# Supplementary material for: Climatic and tectonic controls on shallow-marine and freshwater diatomite deposition throughout the Palaeogene
Source: Copernicus journal article supplement (doi:10.5194/cp-20-2629-2024), 2024-11-28
Supplement: Supplementary file 23 [file cp-20-2629-2024-supplement.zip]

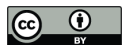

## *Supplement of*

# **Climatic and tectonic controls on shallow-marine and freshwater diatomite deposition throughout the Palaeogene**

**Cécile Figus et al.**

*Correspondence to:* Cécile Figus ([cecile.figus@phd.usz.edu.pl](mailto:cecile.figus@phd.usz.edu.pl))

- [cp-20-2629-2024-supplement-title-page.pdf](#)
- [diatomites\\_db.xls](#)
- [map\\_straume2023\\_GM\\_23.00Ma.pdf](#)
- [map\\_straume2023\\_GM\\_24.00Ma.pdf](#)
- [map\\_straume2023\\_GM\\_25.00Ma.pdf](#)
- [map\\_straume2023\\_GM\\_26.00Ma.pdf](#)
- [map\\_straume2023\\_GM\\_27.00Ma.pdf](#)
- [map\\_straume2023\\_GM\\_28.00Ma.pdf](#)
- [map\\_straume2023\\_GM\\_29.00Ma.pdf](#)
- [map\\_straume2023\\_GM\\_30.00Ma.pdf](#)
- [map\\_straume2023\\_GM\\_31.00Ma.pdf](#)
- [map\\_straume2023\\_GM\\_32.00Ma.pdf](#)
- [map\\_straume2023\\_GM\\_33.00Ma.pdf](#)
- [map\\_straume2023\\_GM\\_34.00Ma.pdf](#)
- [map\\_straume2023\\_GM\\_35.00Ma.pdf](#)
- [map\\_straume2023\\_GM\\_36.00Ma.pdf](#)
- [map\\_straume2023\\_GM\\_37.00Ma.pdf](#)
- [map\\_straume2023\\_GM\\_38.00Ma.pdf](#)
- [map\\_straume2023\\_GM\\_39.00Ma.pdf](#)
- [map\\_straume2023\\_GM\\_40.00Ma.pdf](#)

- map\_straume2023\_GM\_41.00Ma.pdf
- map\_straume2023\_GM\_42.00Ma.pdf
- map\_straume2023\_GM\_43.00Ma.pdf
- map\_straume2023\_GM\_44.00Ma.pdf
- map\_straume2023\_GM\_45.00Ma.pdf
- map\_straume2023\_GM\_46.00Ma.pdf
- map\_straume2023\_GM\_47.00Ma.pdf
- map\_straume2023\_GM\_48.00Ma.pdf
- map\_straume2023\_GM\_49.00Ma.pdf
- map\_straume2023\_GM\_50.00Ma.pdf
- map\_straume2023\_GM\_51.00Ma.pdf
- map\_straume2023\_GM\_52.00Ma.pdf
- map\_straume2023\_GM\_53.00Ma.pdf
- map\_straume2023\_GM\_54.00Ma.pdf
- map\_straume2023\_GM\_55.00Ma.pdf
- map\_straume2023\_GM\_56.00Ma.pdf
- map\_straume2023\_GM\_57.00Ma.pdf
- map\_straume2023\_GM\_58.00Ma.pdf
- map\_straume2023\_GM\_59.00Ma.pdf
- map\_straume2023\_GM\_60.00Ma.pdf
- map\_straume2023\_GM\_61.00Ma.pdf
- map\_straume2023\_GM\_62.00Ma.pdf
- map\_straume2023\_GM\_63.00Ma.pdf
- map\_straume2023\_GM\_64.00Ma.pdf
- map\_straume2023\_GM\_65.00Ma.pdf

The copyright of individual parts of the supplement might differ from the article licence.
