# Supplementary figures and images for: Climatic and tectonic controls on shallow-marine and freshwater diatomite deposition throughout the Palaeogene
Source: Copernicus journal article supplement (doi:10.5194/cp-20-2629-2024), 2024-11-28

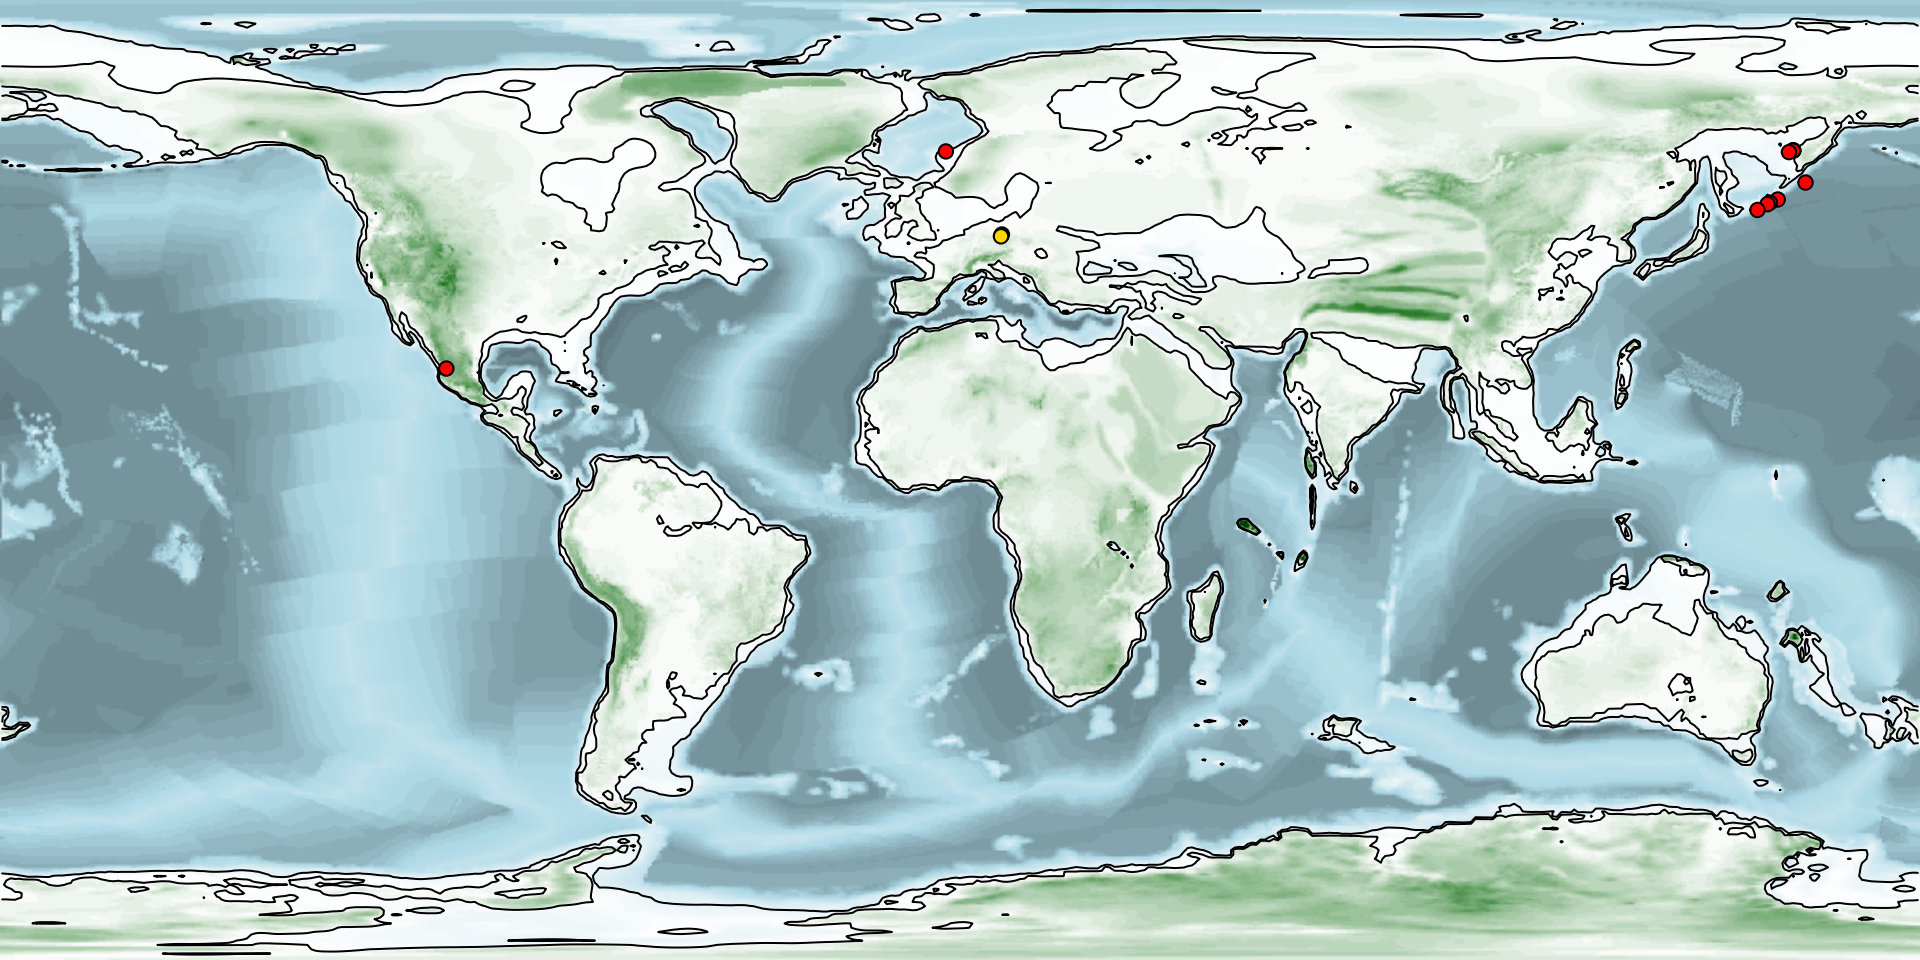

Supplement: Supplementary file 1 [file cp-20-2629-2024-supplement.zip]

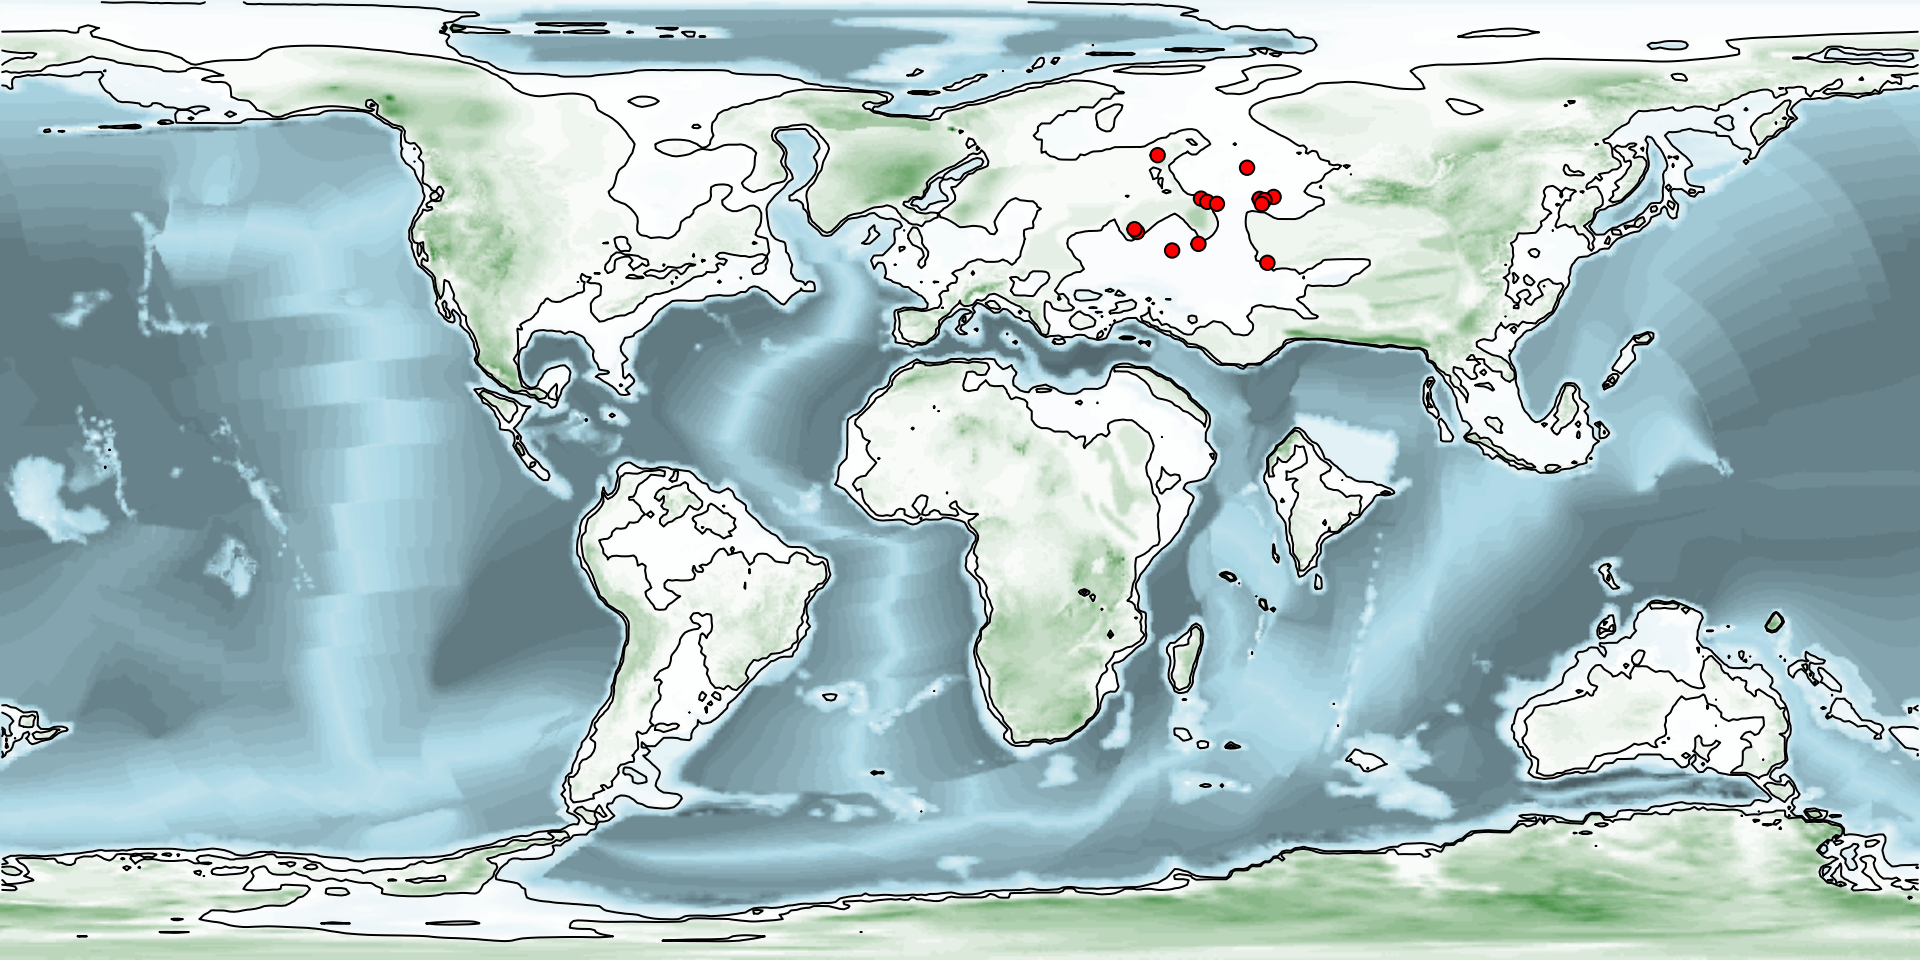

Supplement: Supplementary file 2 [file cp-20-2629-2024-supplement.zip]

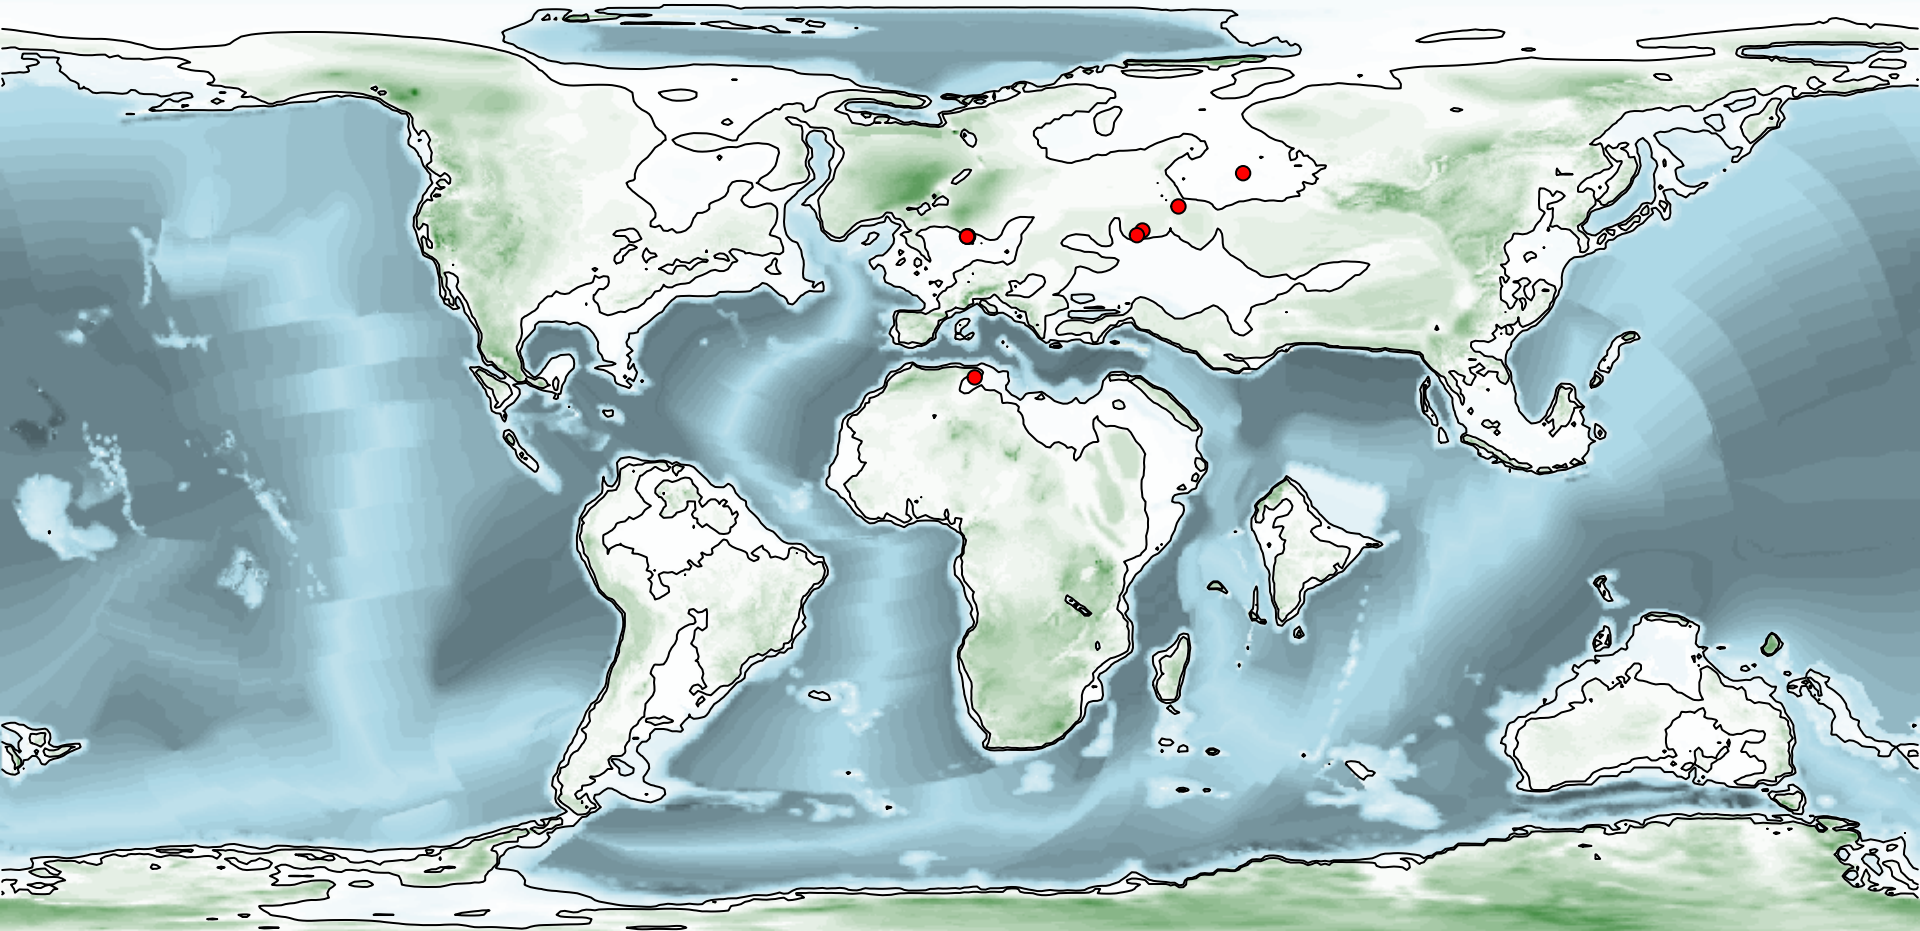

Supplement: Supplementary file 3 [file cp-20-2629-2024-supplement.zip]

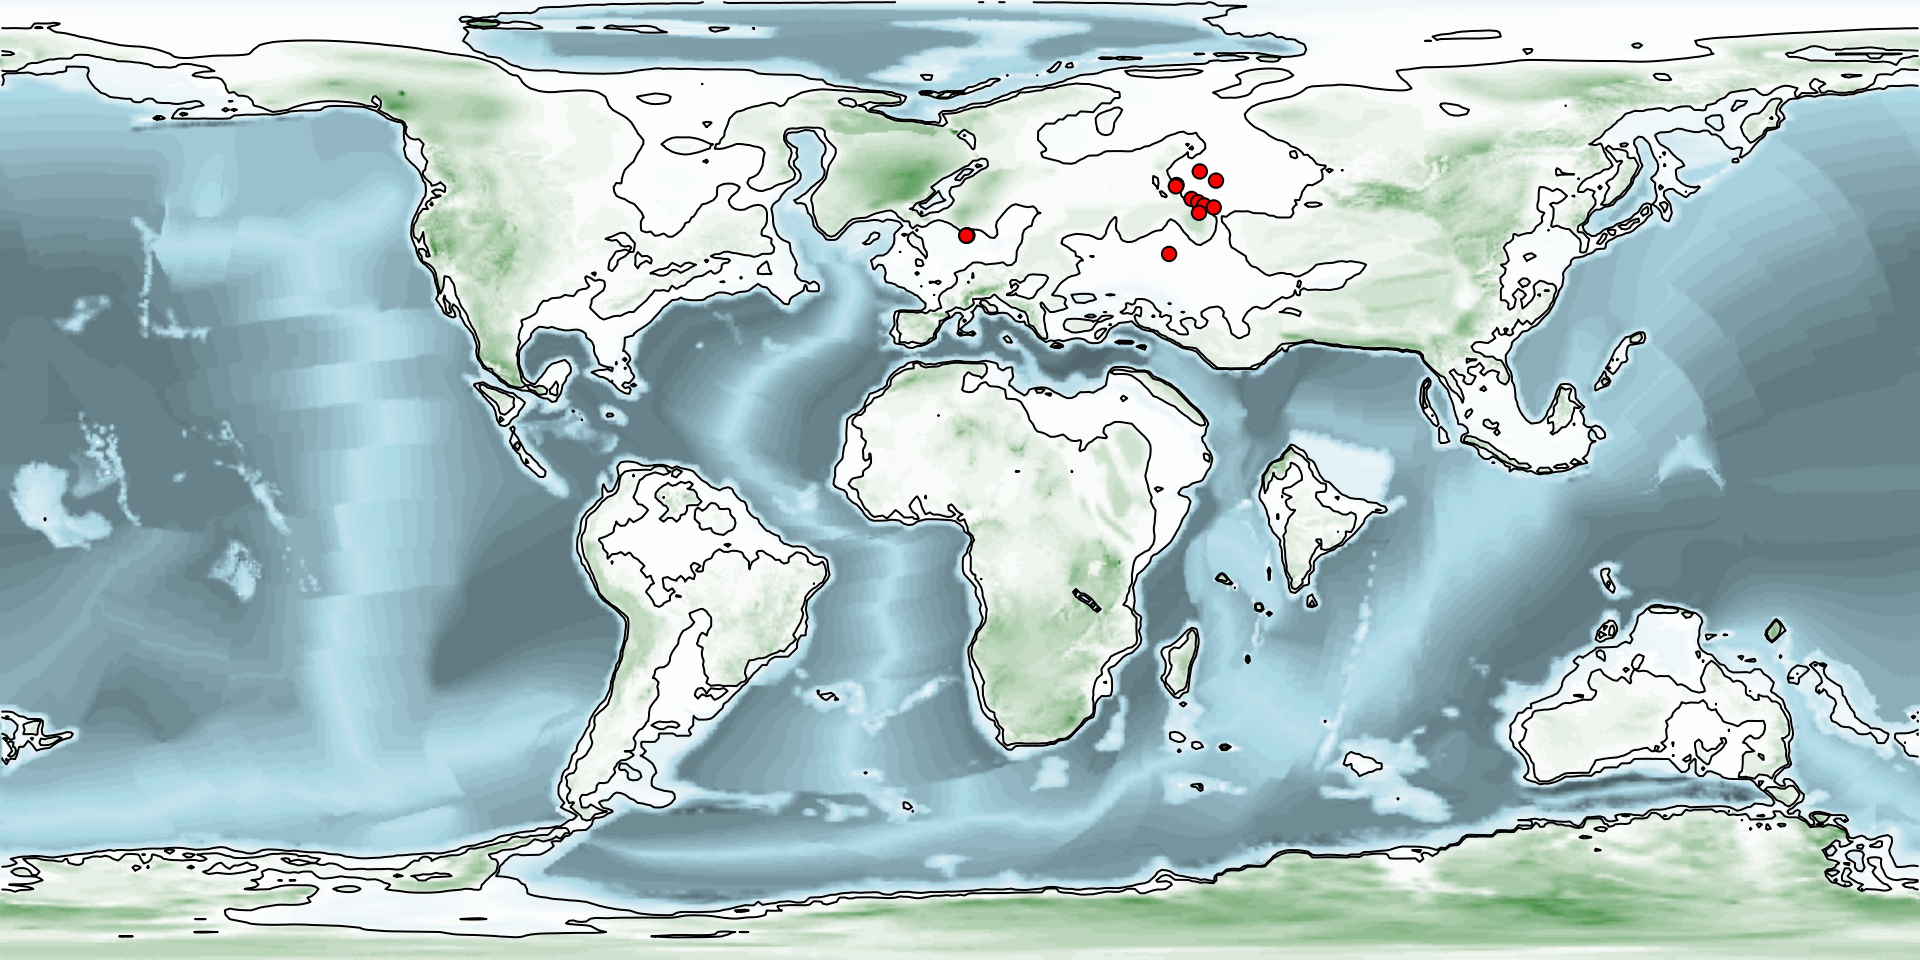

Supplement: Supplementary file 4 [file cp-20-2629-2024-supplement.zip]

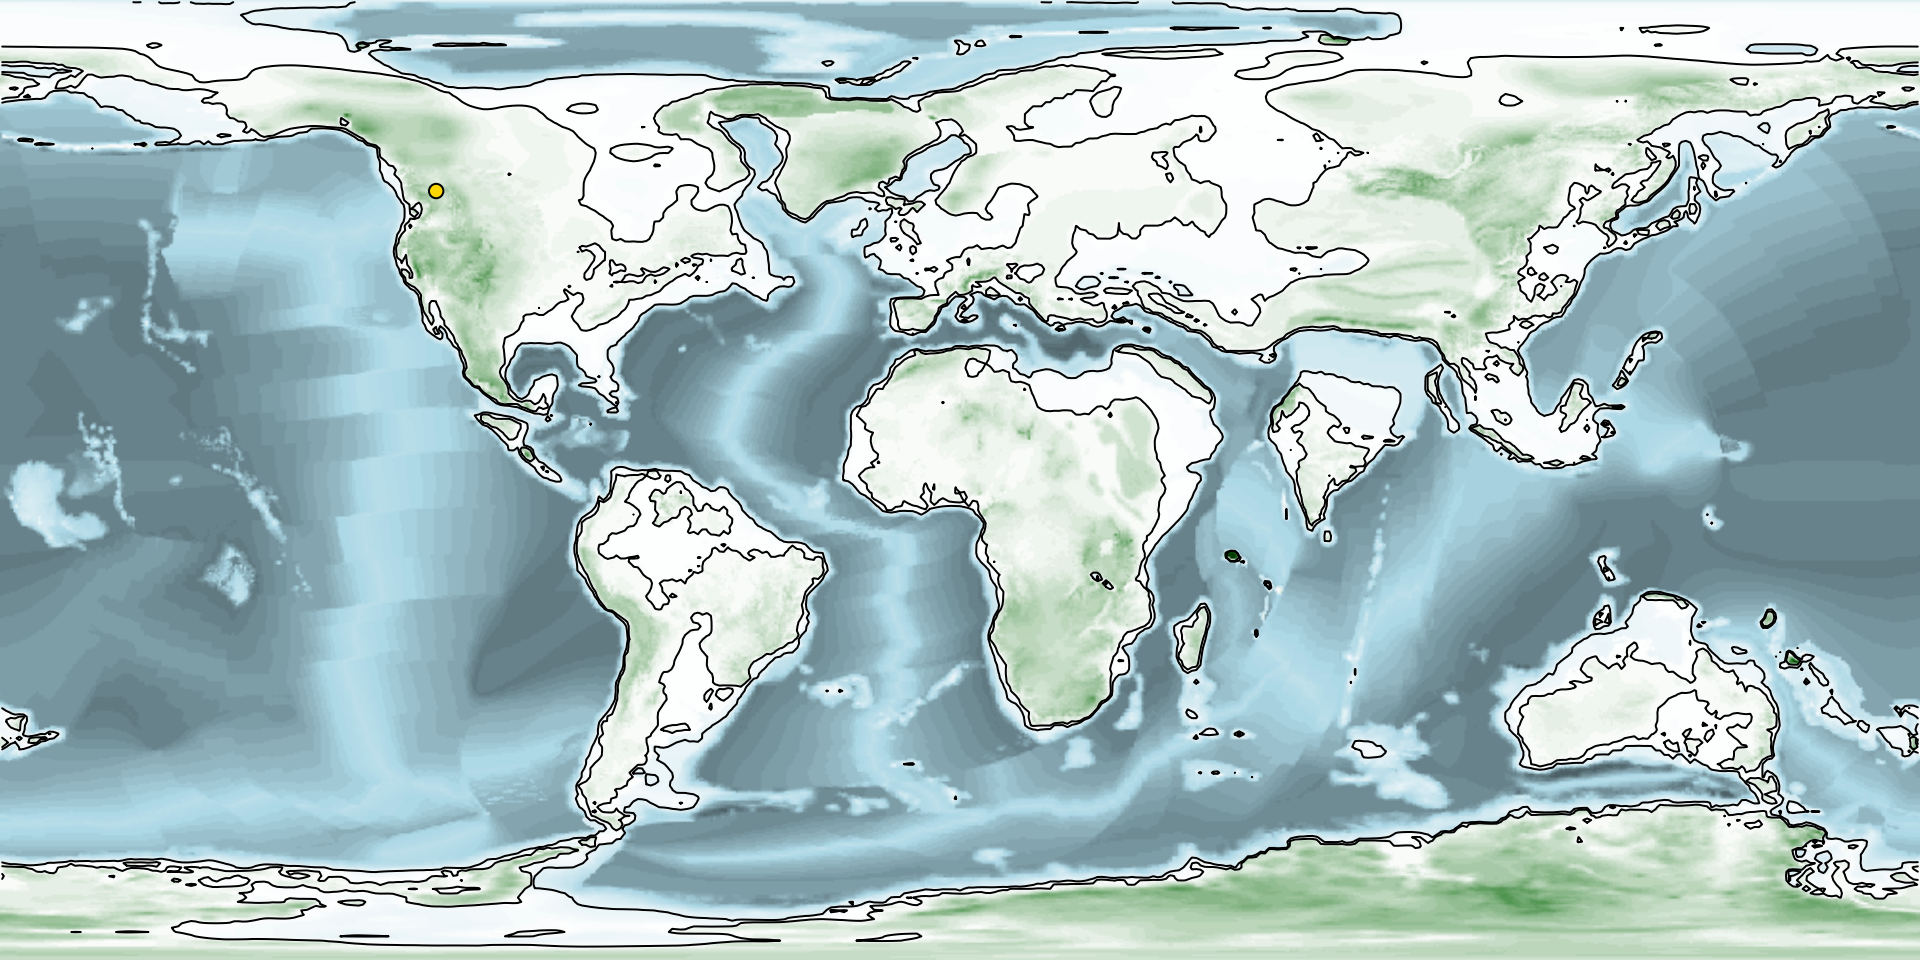

Supplement: Supplementary file 5 [file cp-20-2629-2024-supplement.zip]

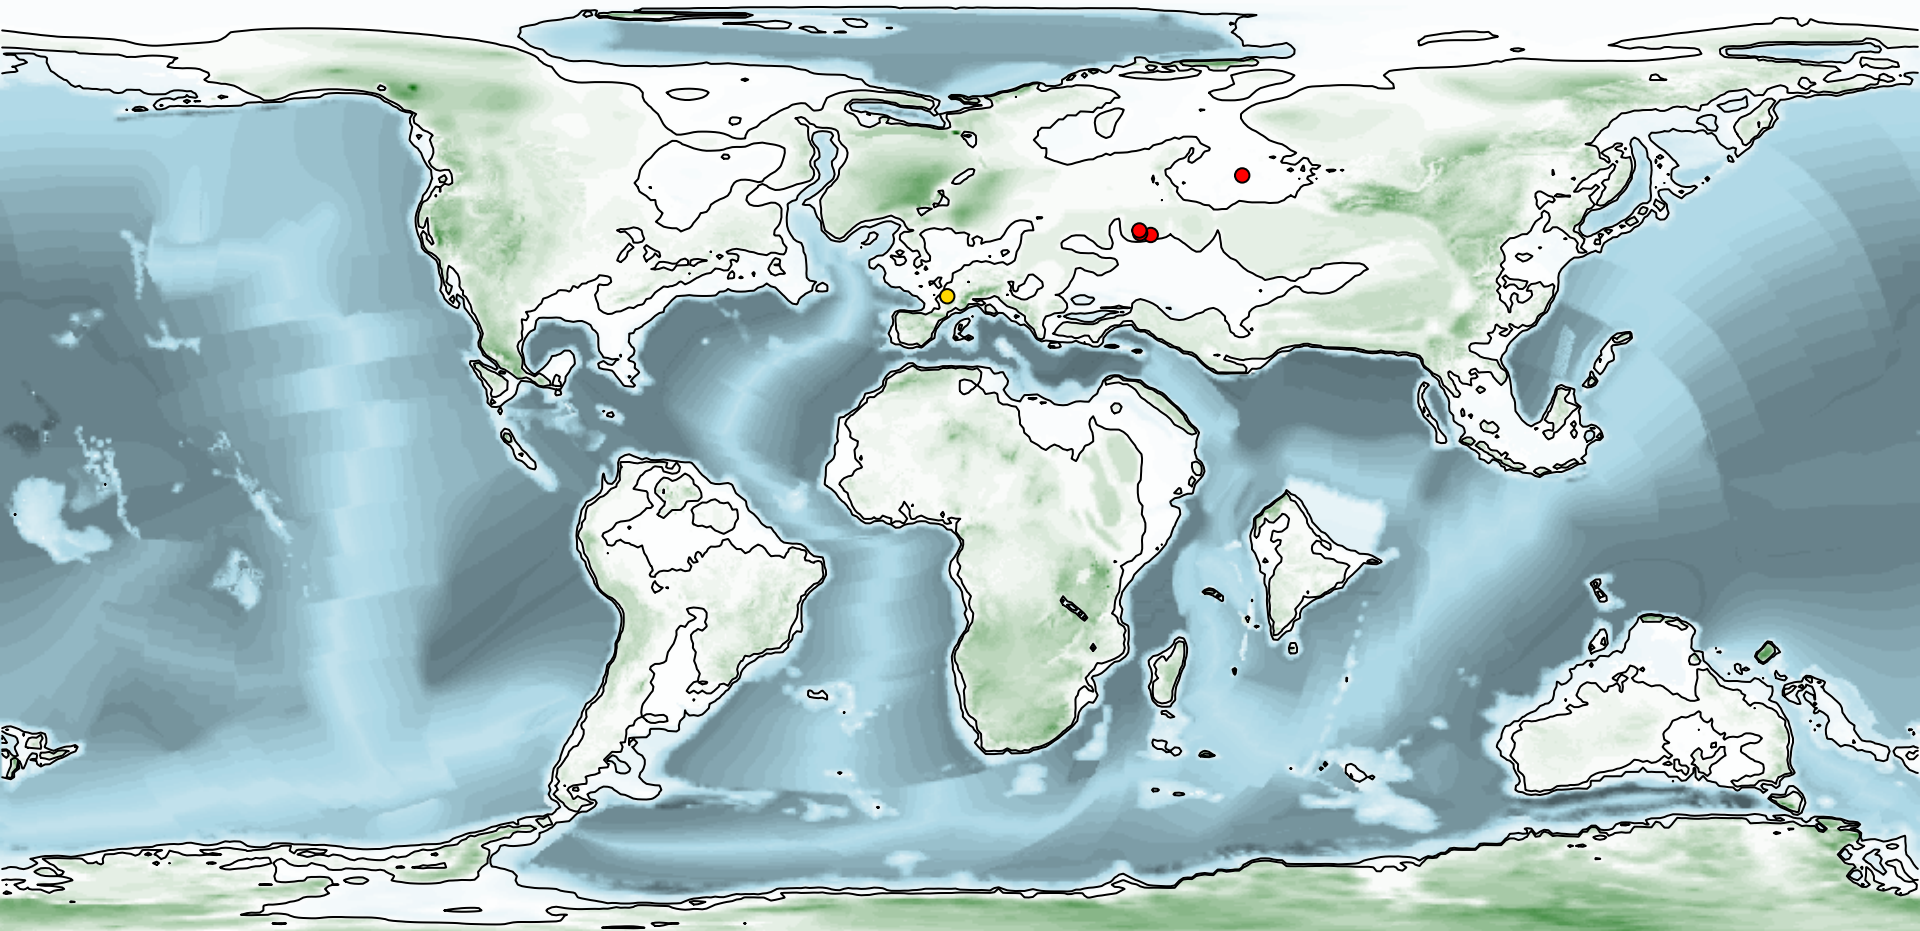

Supplement: Supplementary file 6 [file cp-20-2629-2024-supplement.zip]

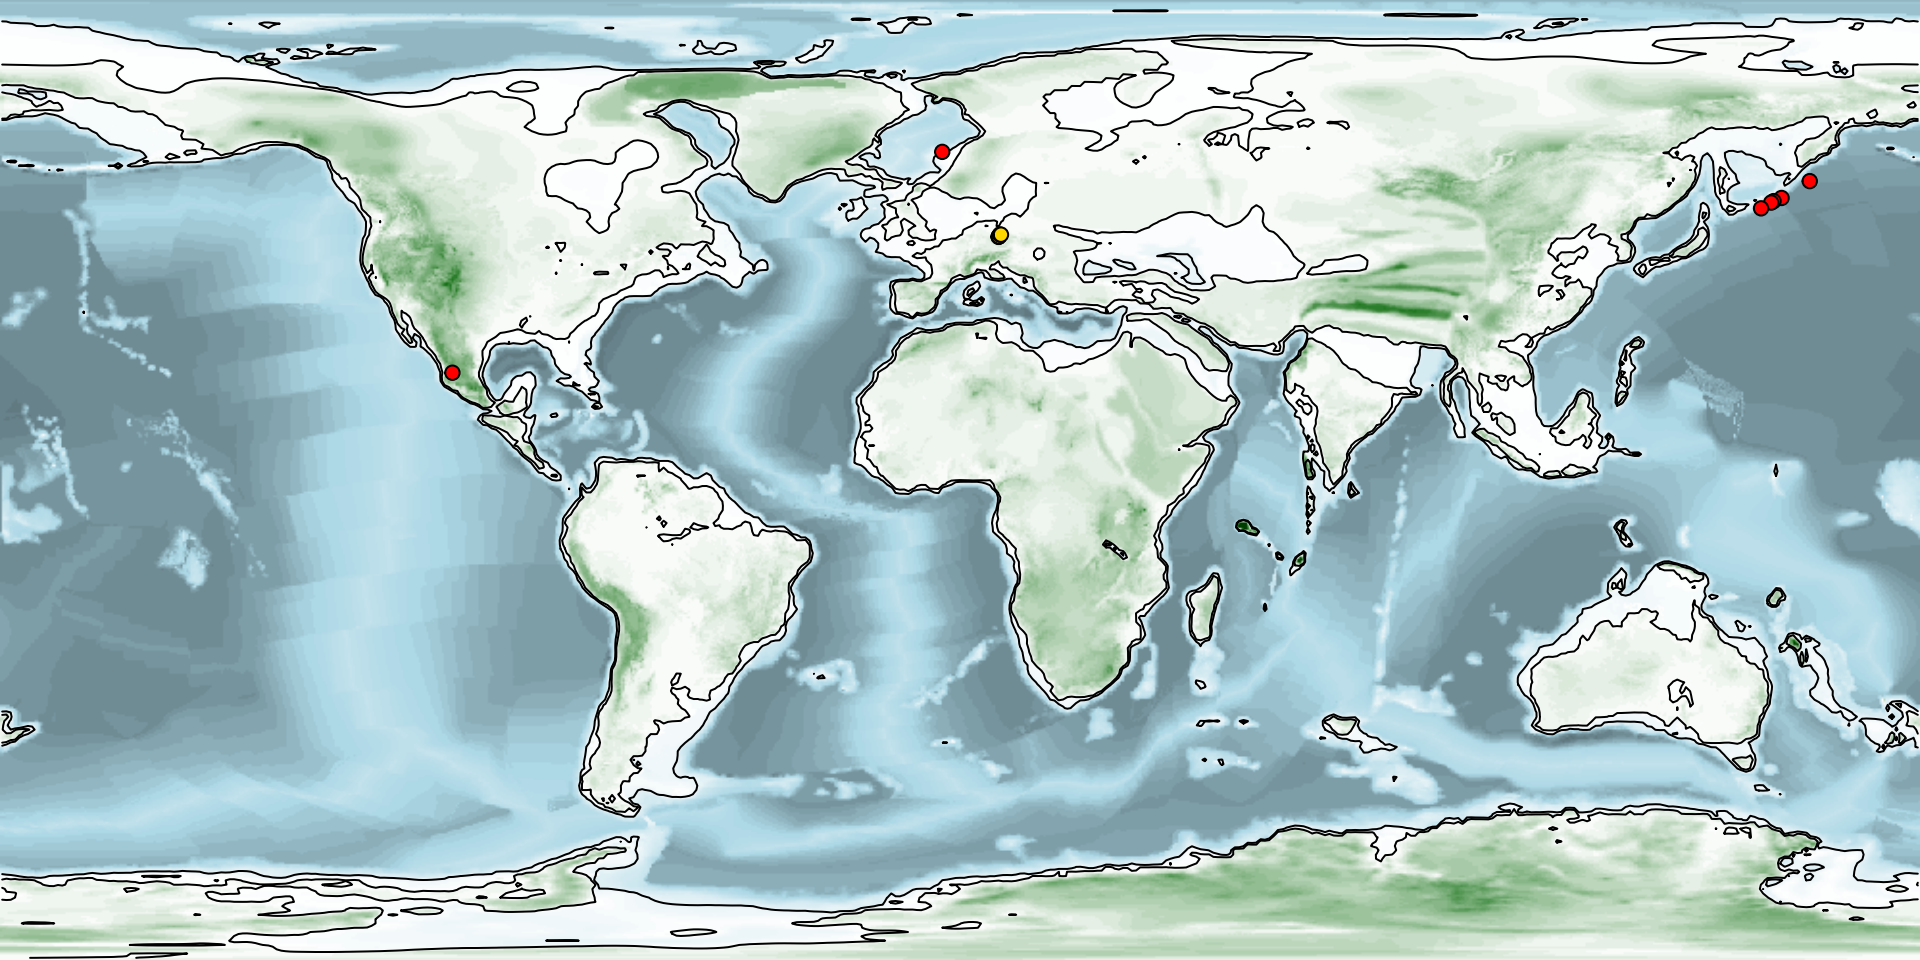

Supplement: Supplementary file 7 [file cp-20-2629-2024-supplement.zip]

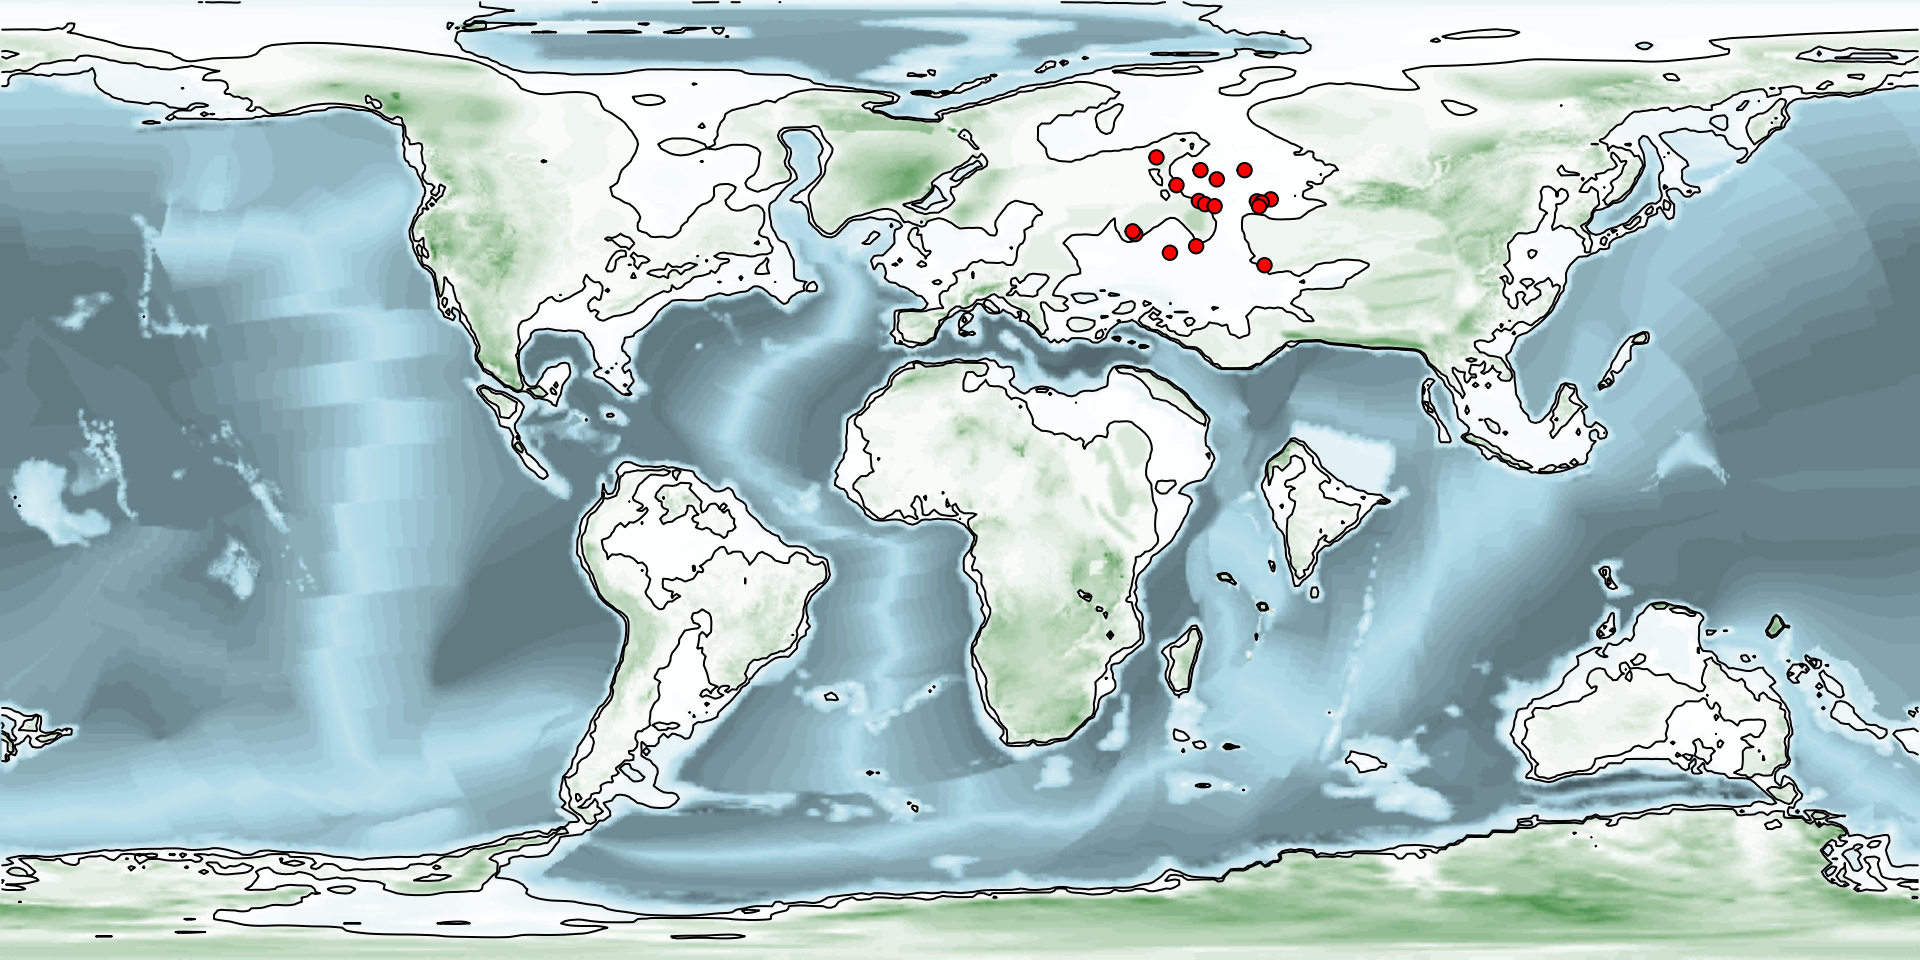

Supplement: Supplementary file 8 [file cp-20-2629-2024-supplement.zip]

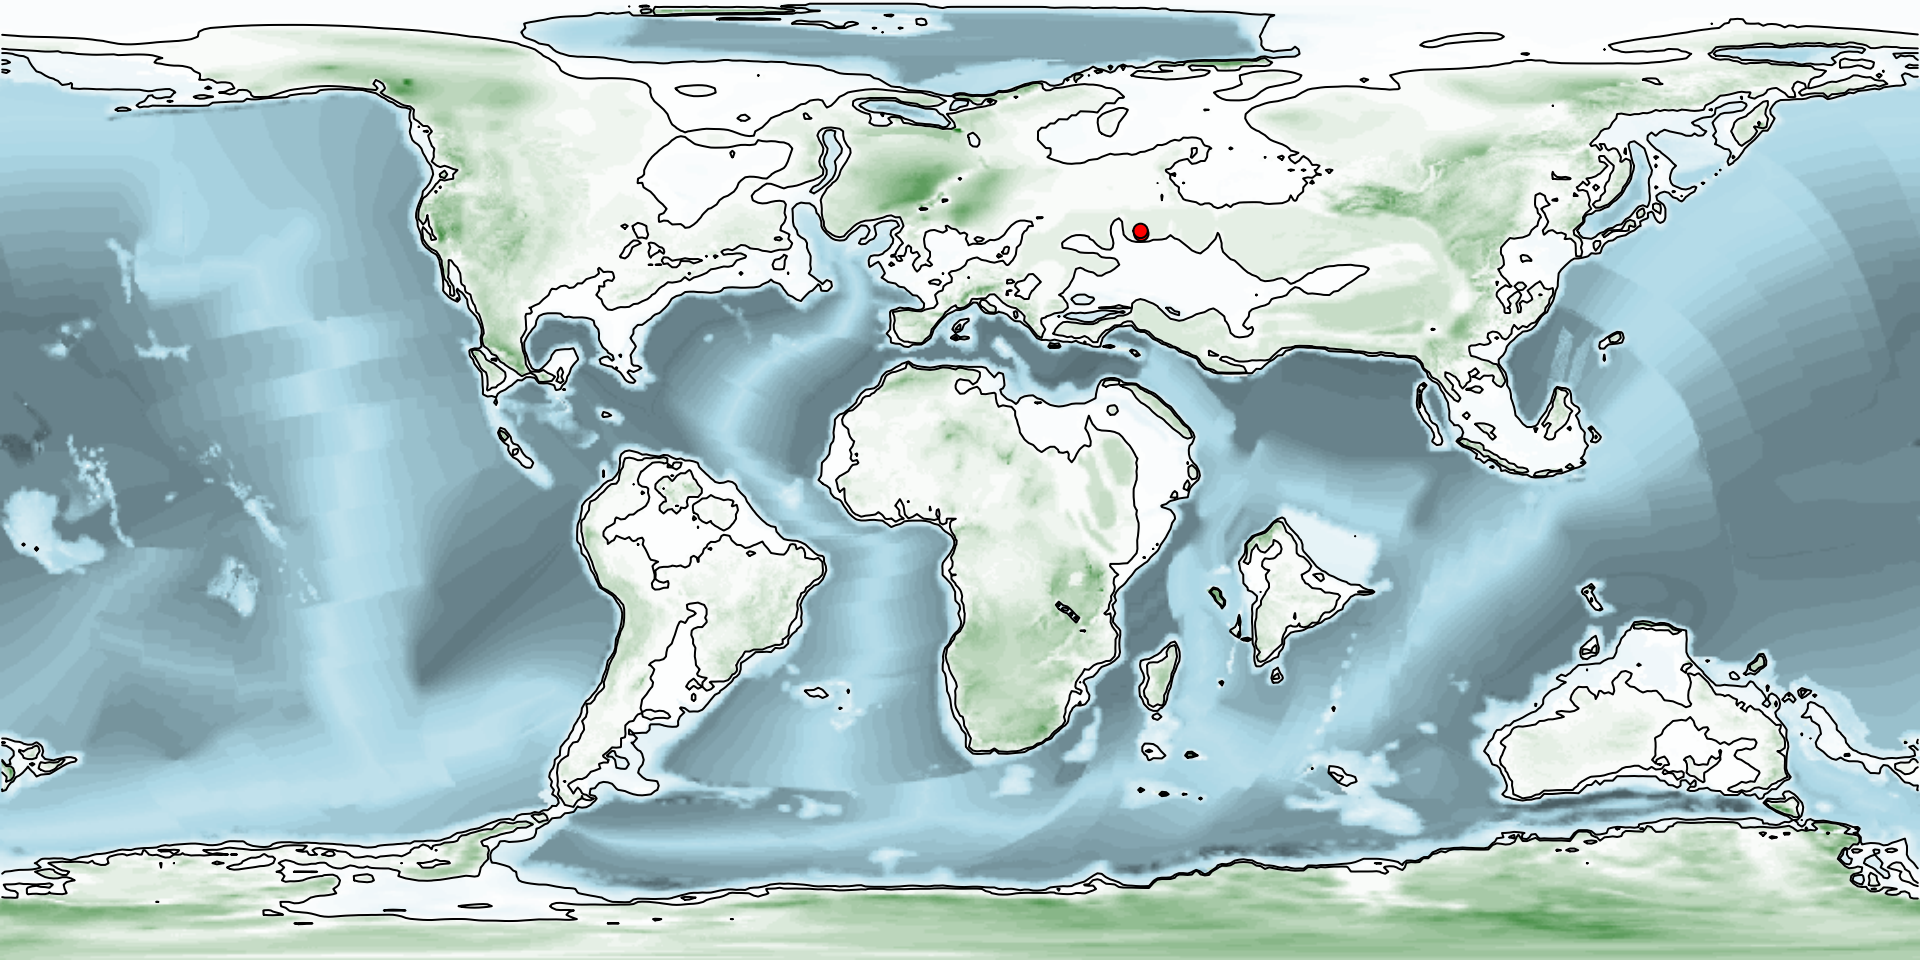

Supplement: Supplementary file 9 [file cp-20-2629-2024-supplement.zip]

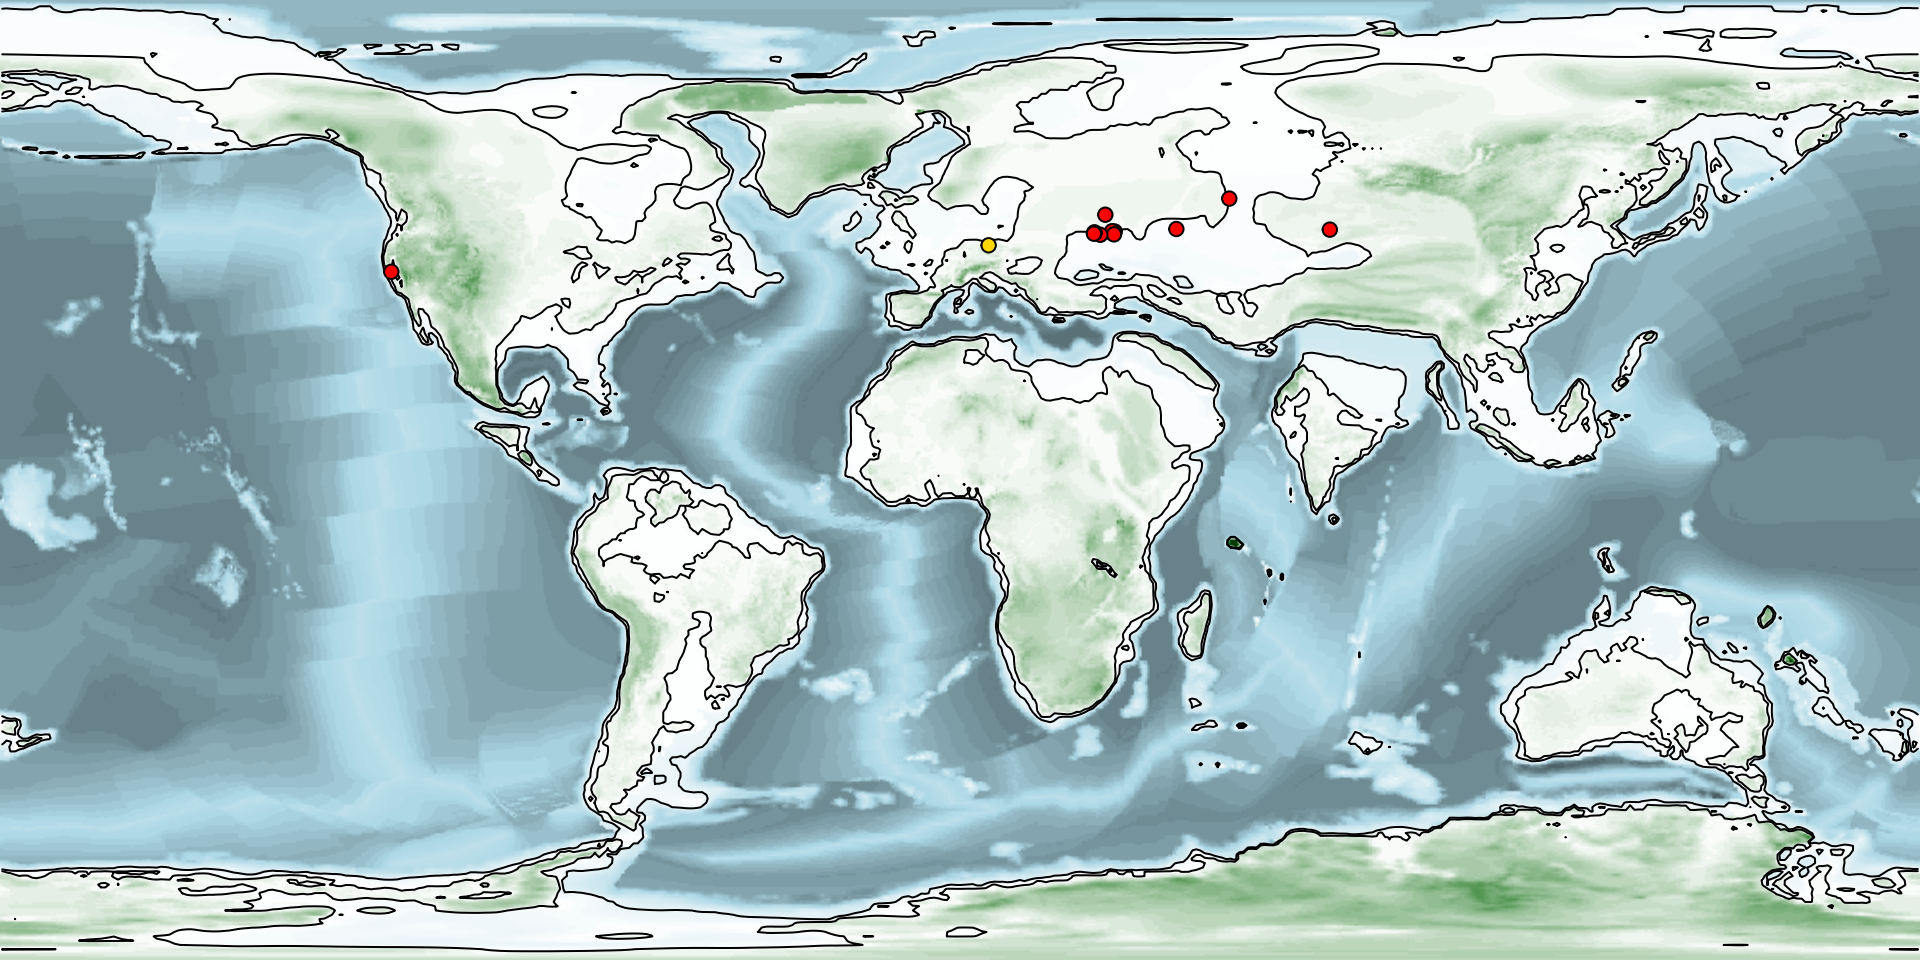

Supplement: Supplementary file 10 [file cp-20-2629-2024-supplement.zip]

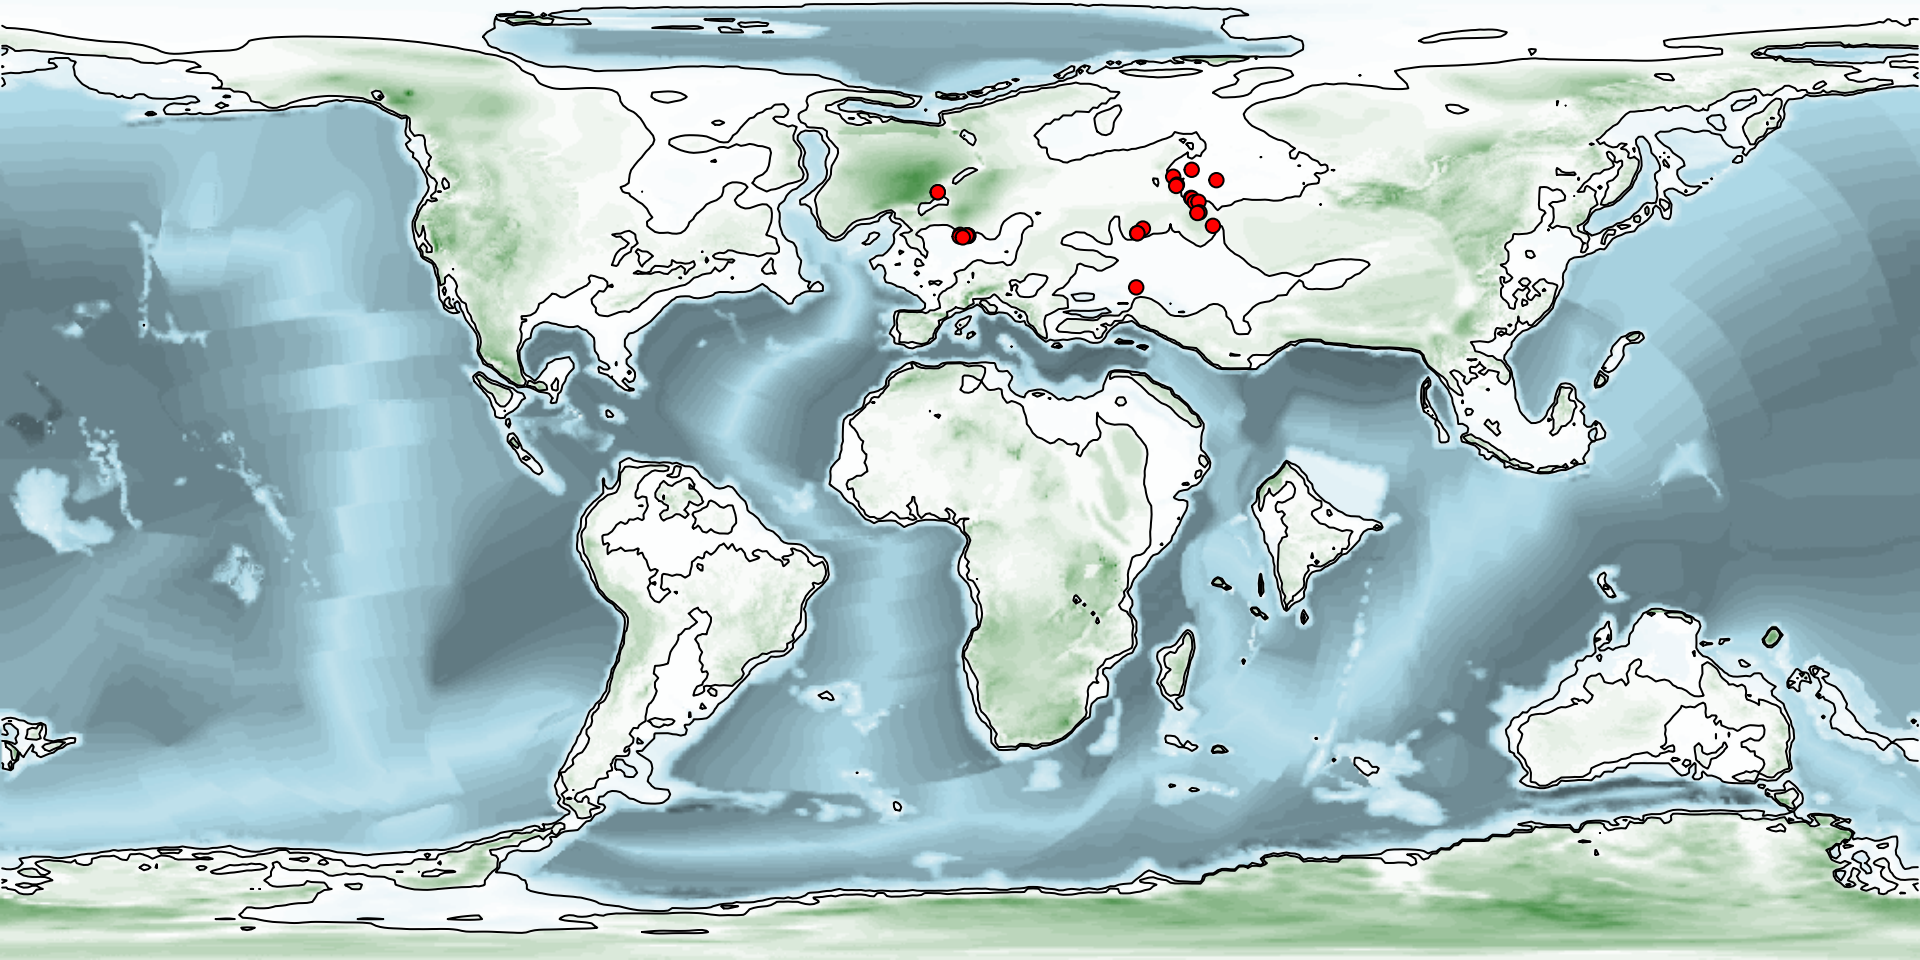

Supplement: Supplementary file 11 [file cp-20-2629-2024-supplement.zip]

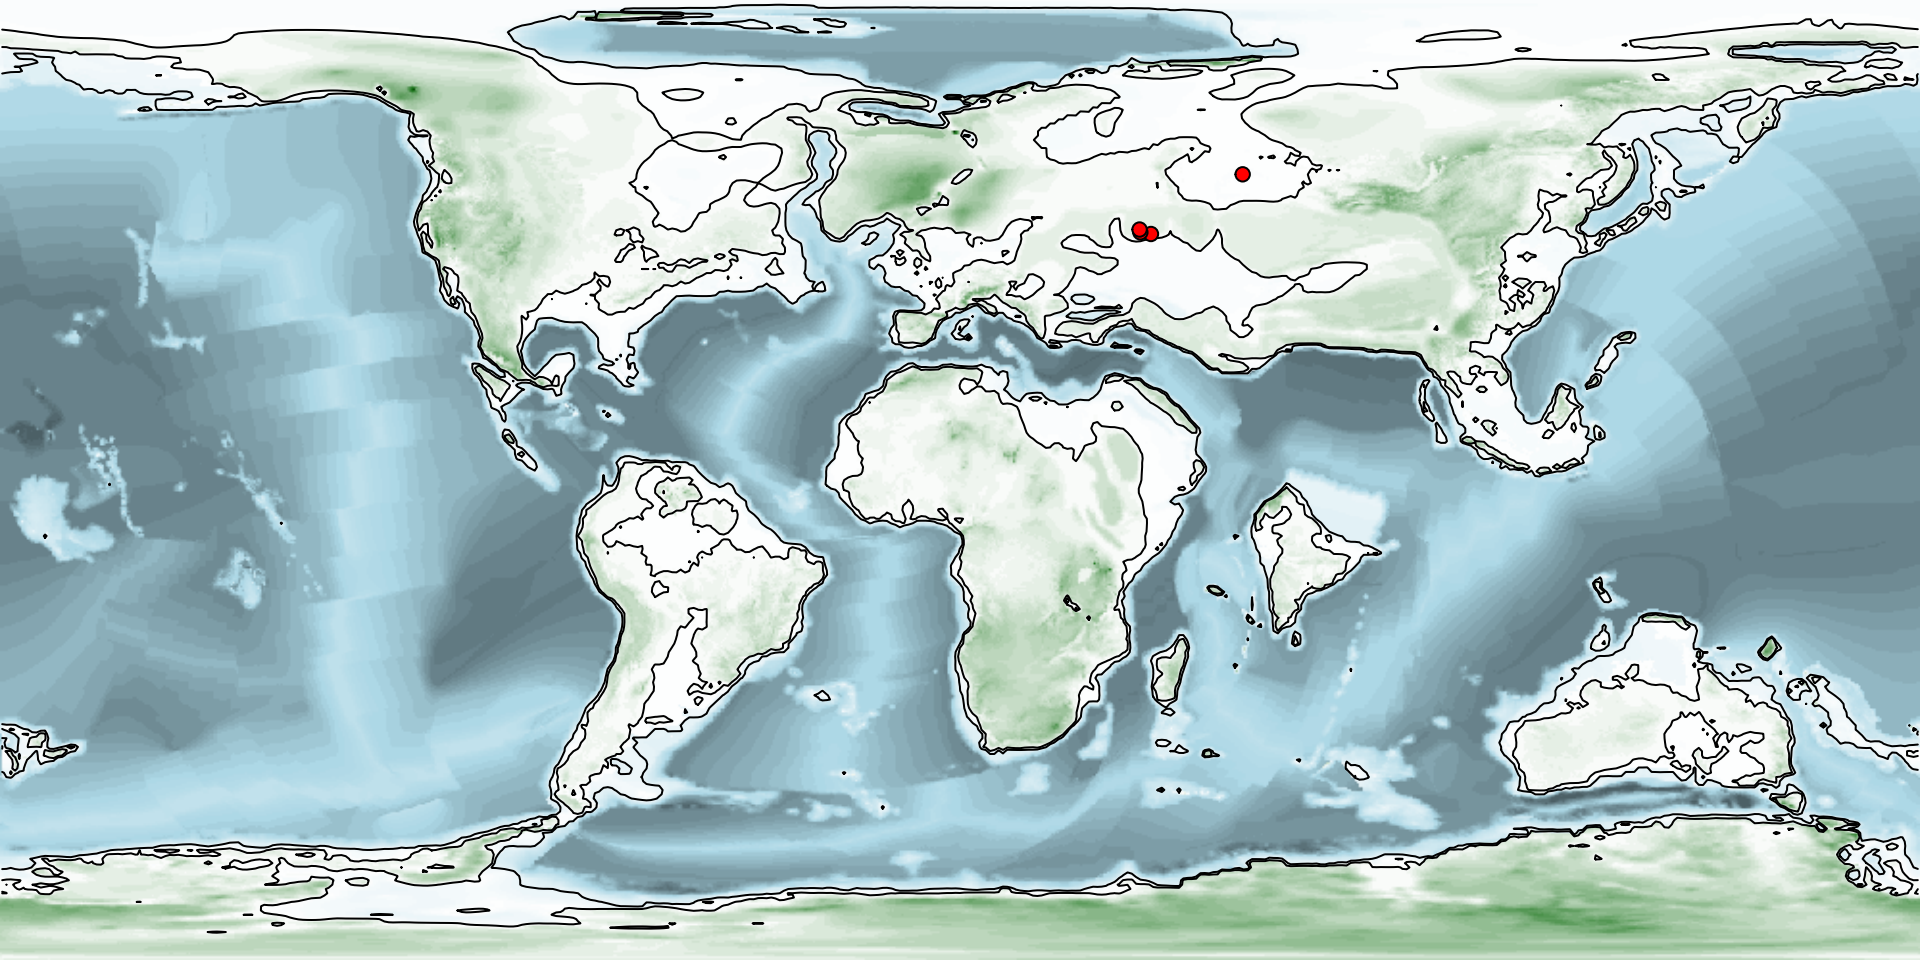

Supplement: Supplementary file 12 [file cp-20-2629-2024-supplement.zip]

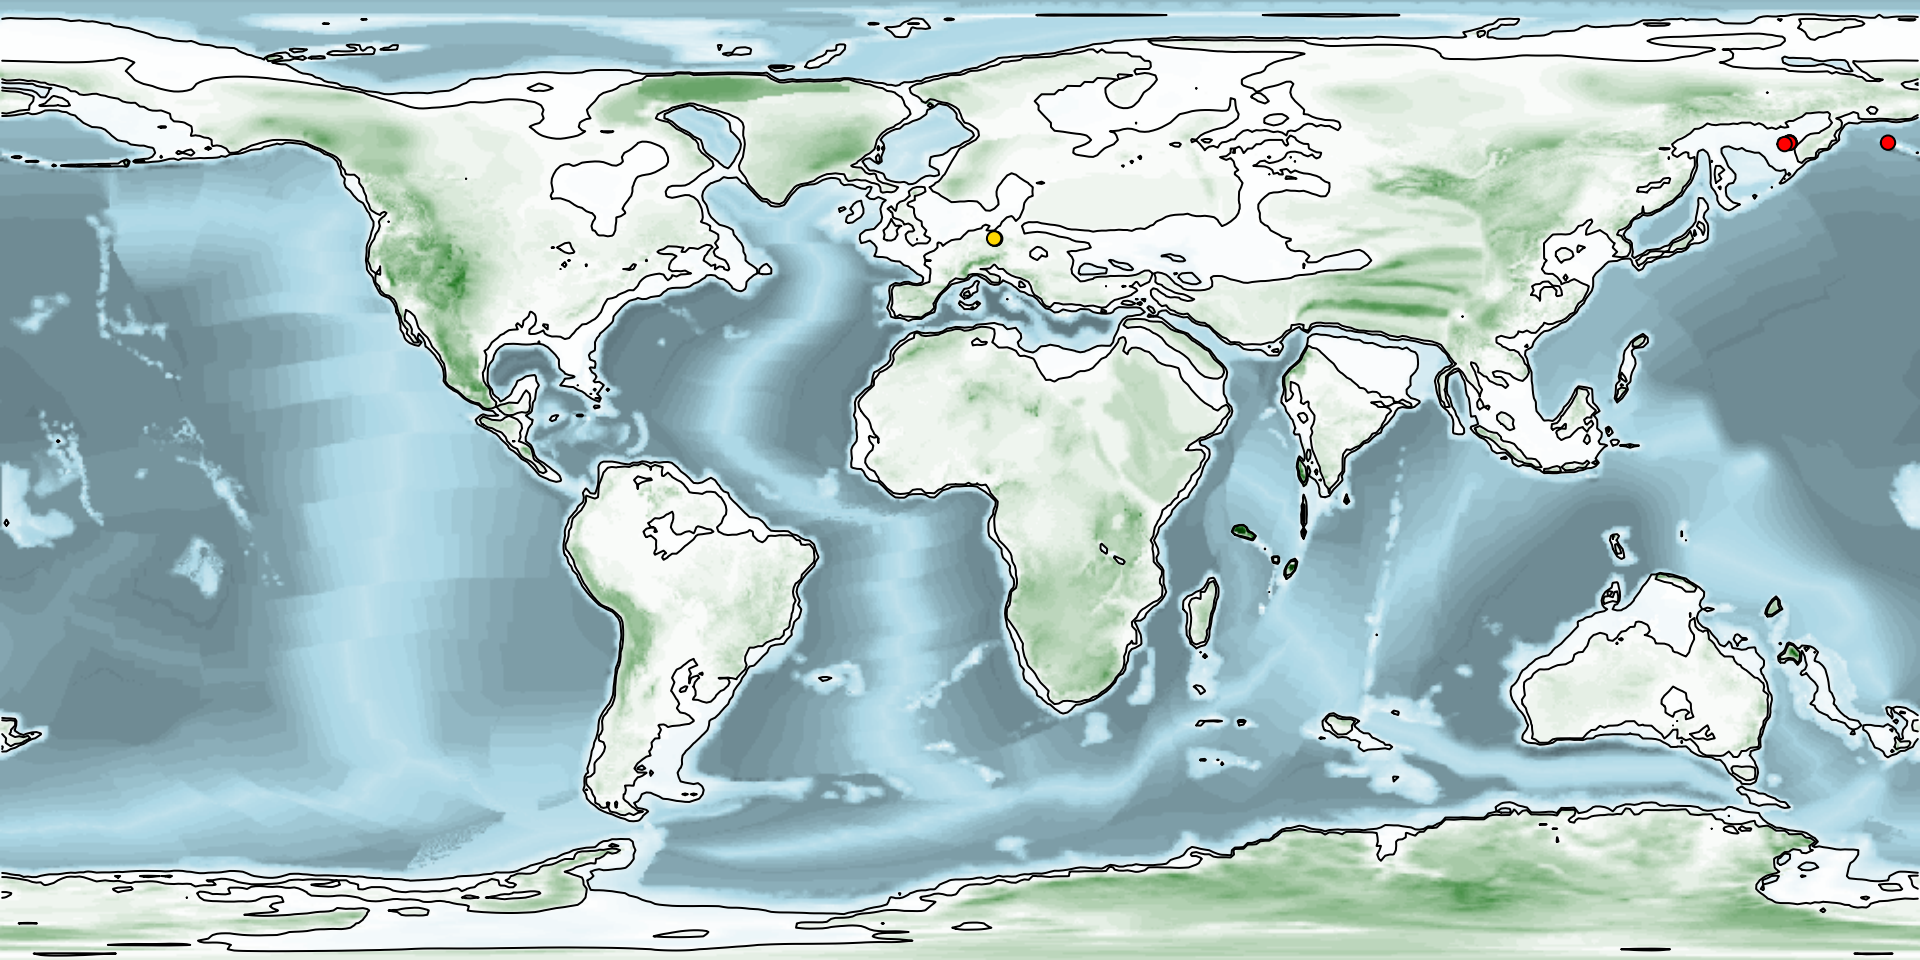

Supplement: Supplementary file 13 [file cp-20-2629-2024-supplement.zip]

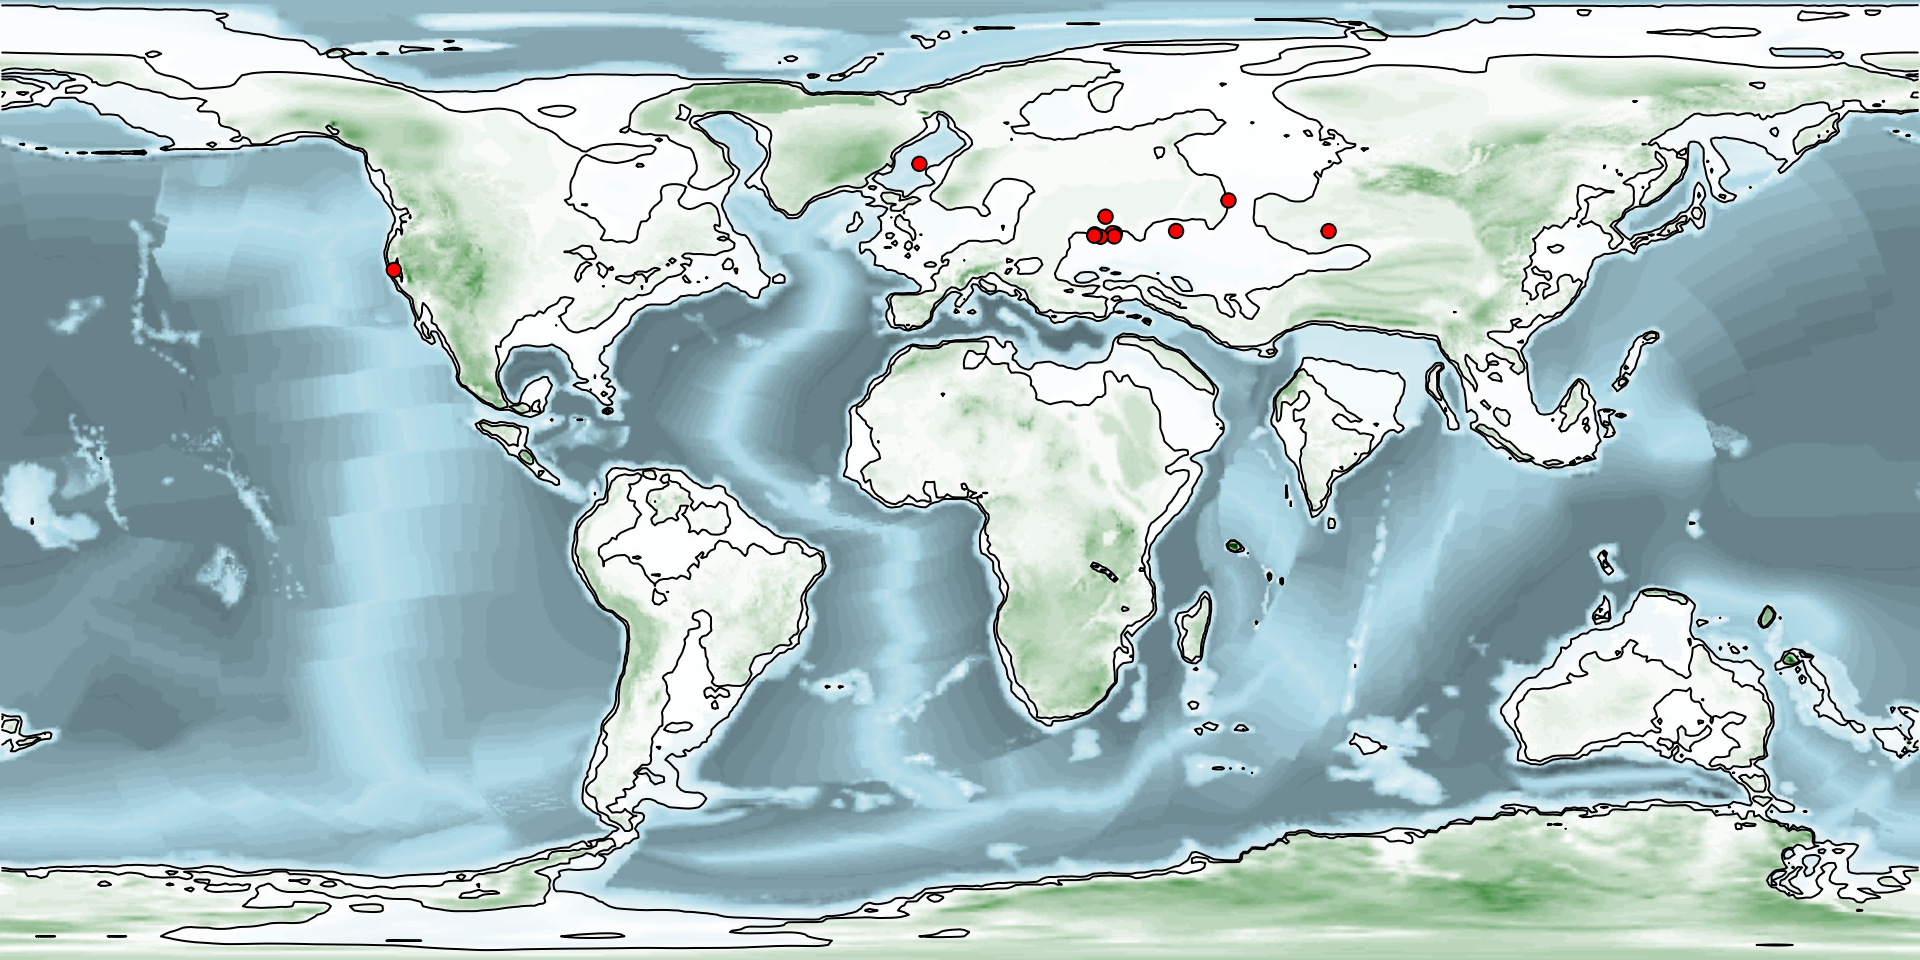

Supplement: Supplementary file 14 [file cp-20-2629-2024-supplement.zip]

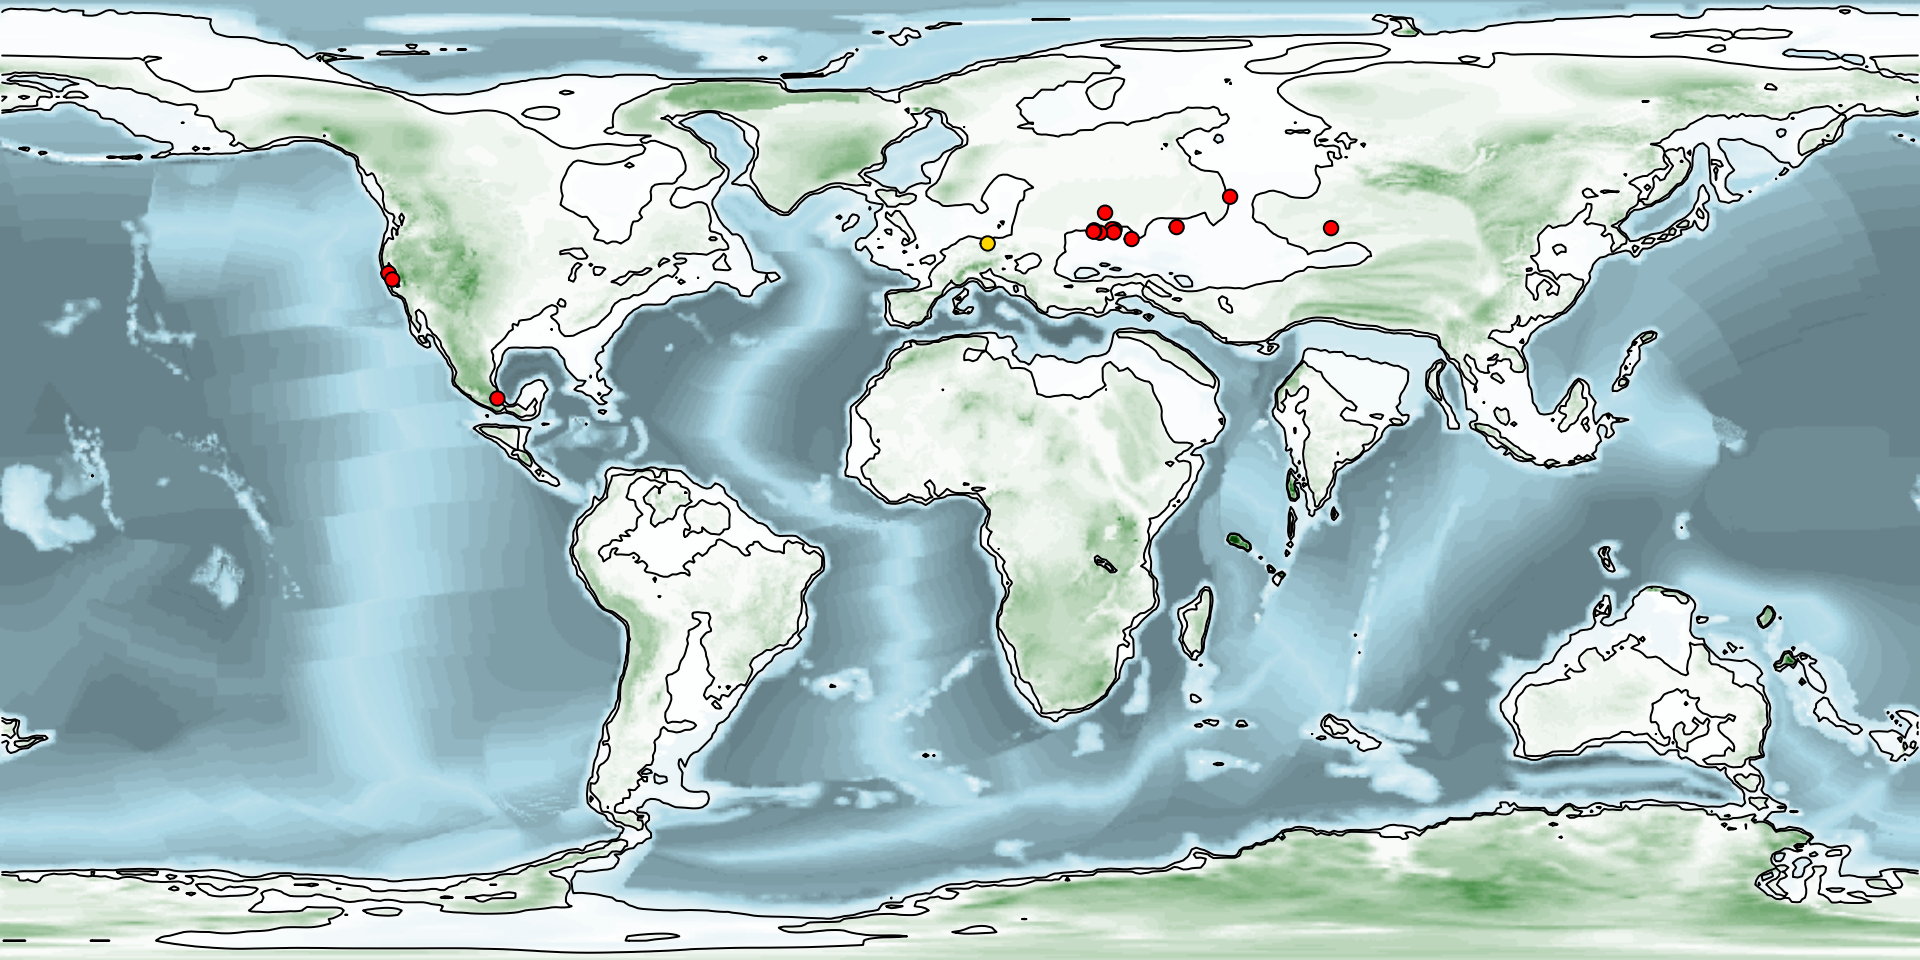

Supplement: Supplementary file 15 [file cp-20-2629-2024-supplement.zip]

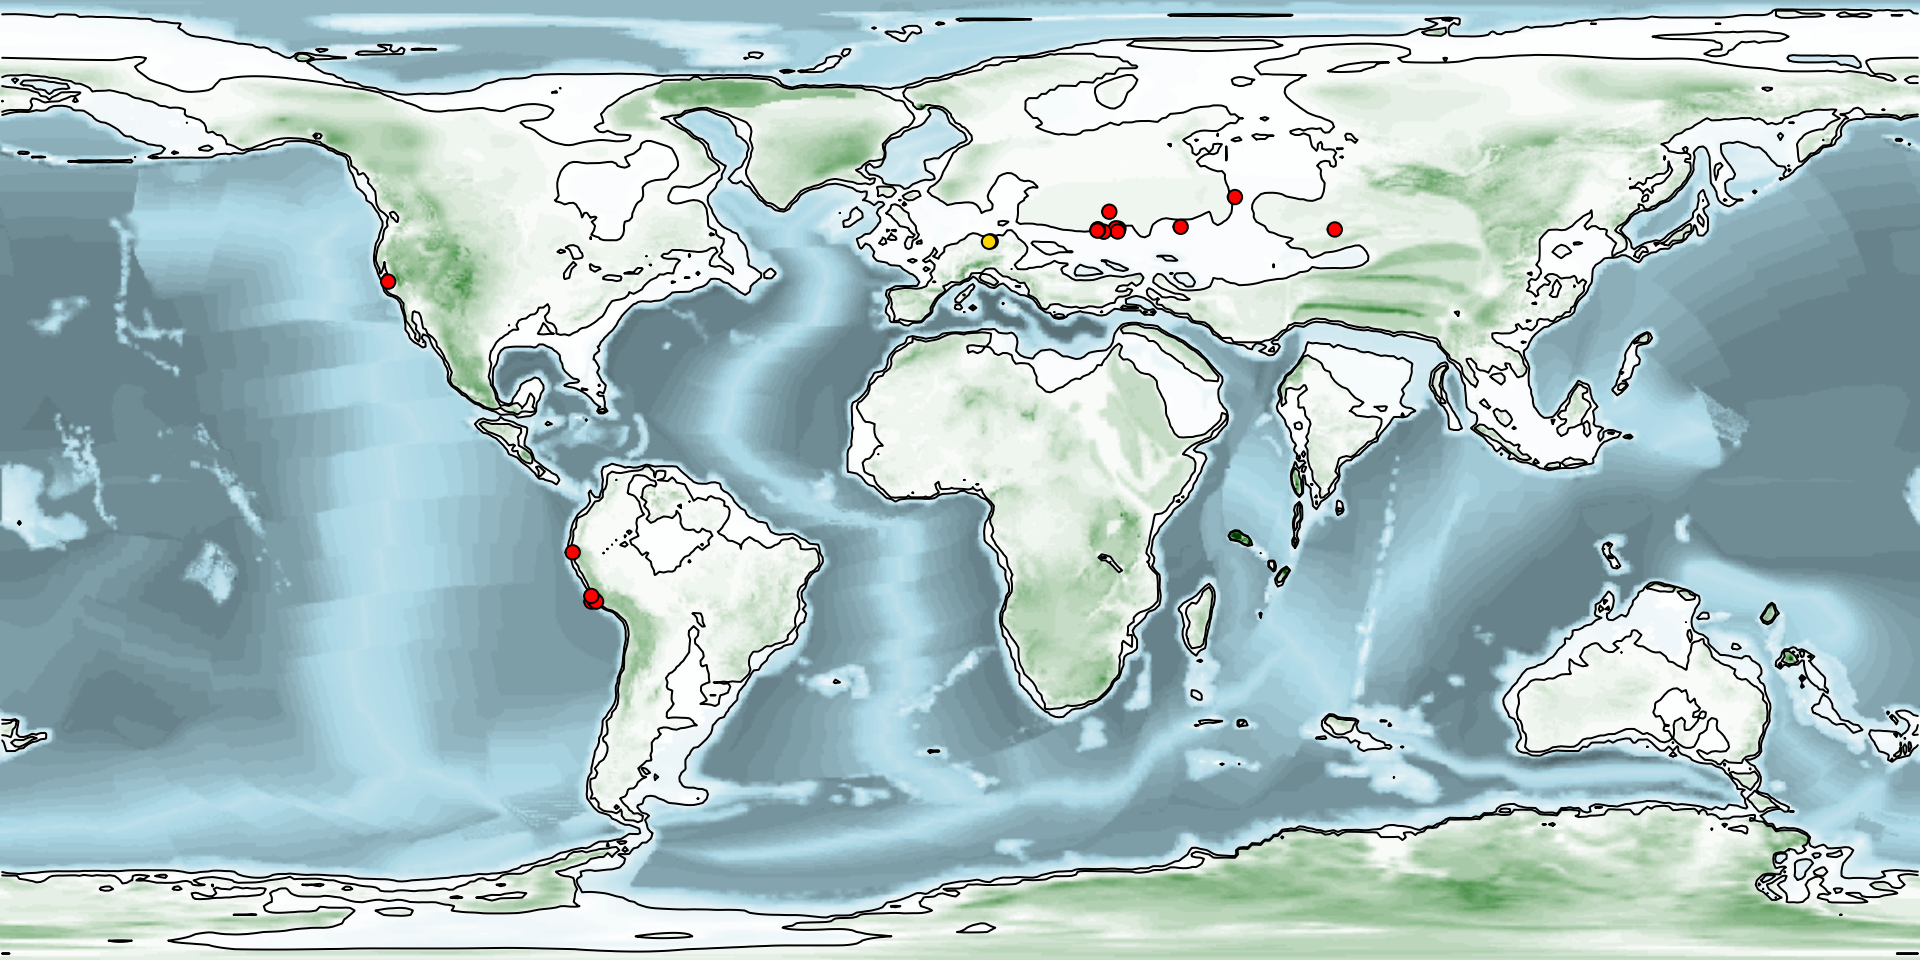

Supplement: Supplementary file 16 [file cp-20-2629-2024-supplement.zip]

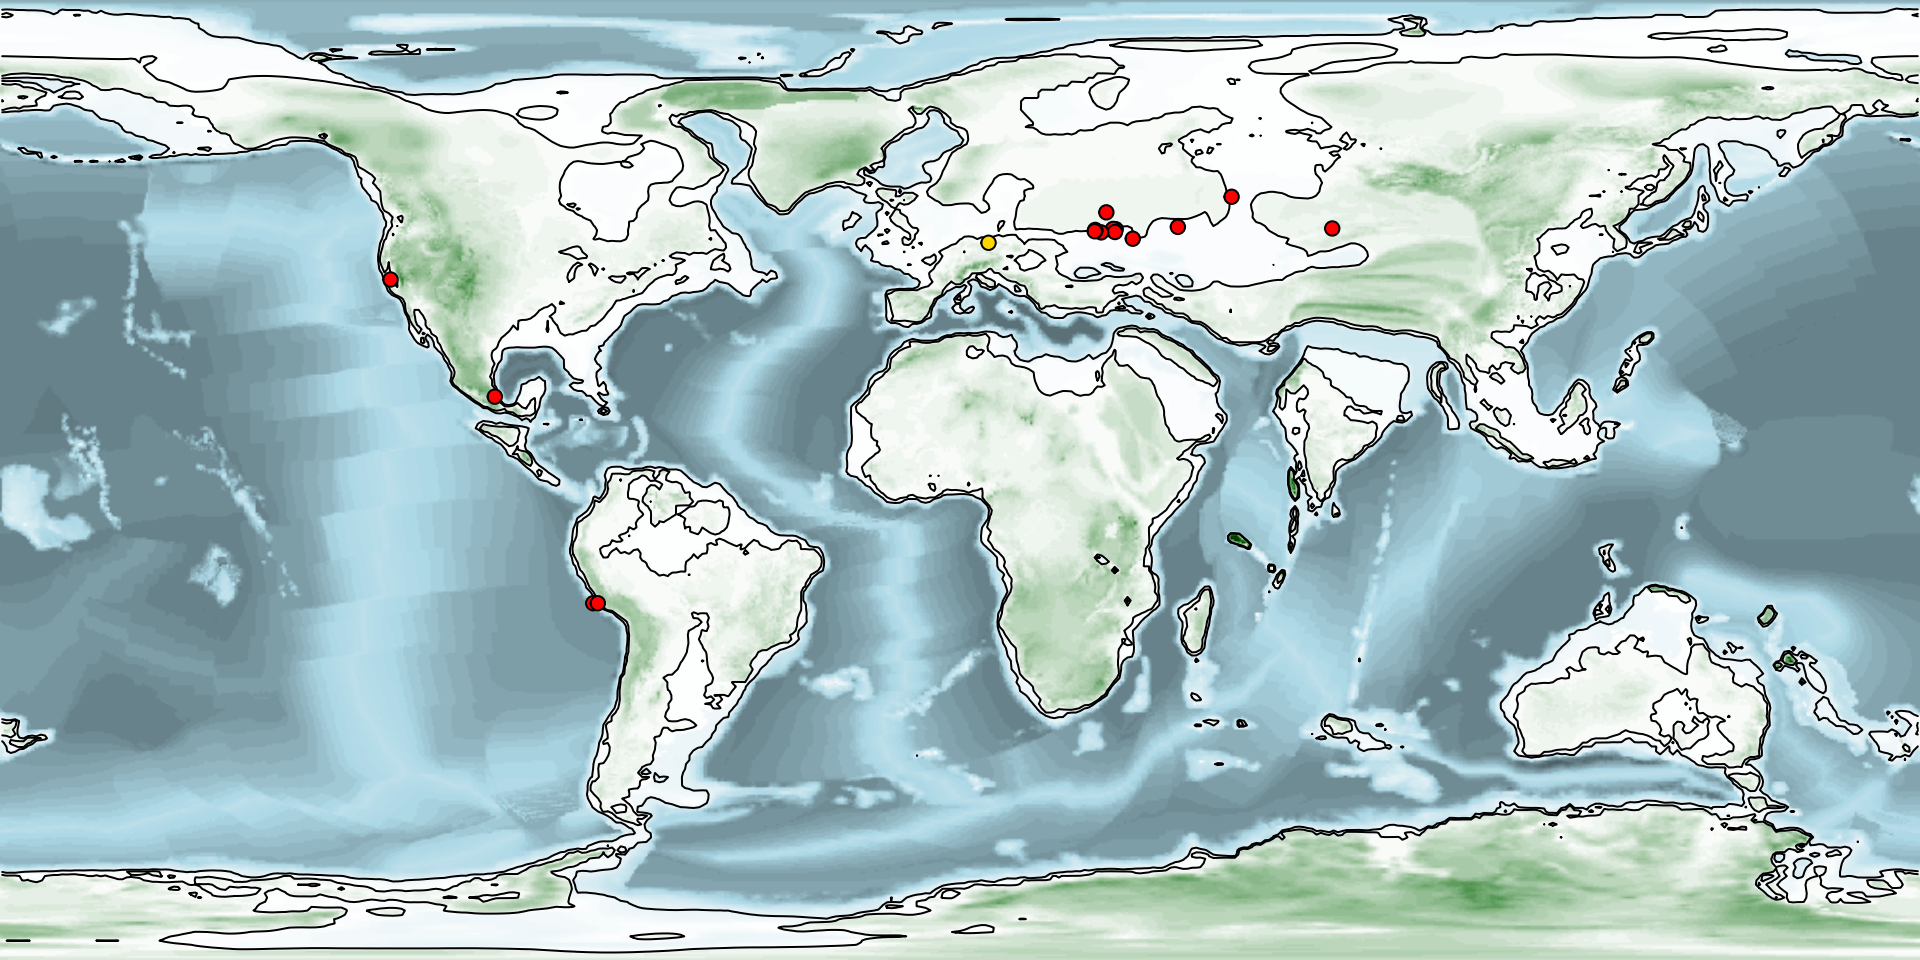

Supplement: Supplementary file 17 [file cp-20-2629-2024-supplement.zip]

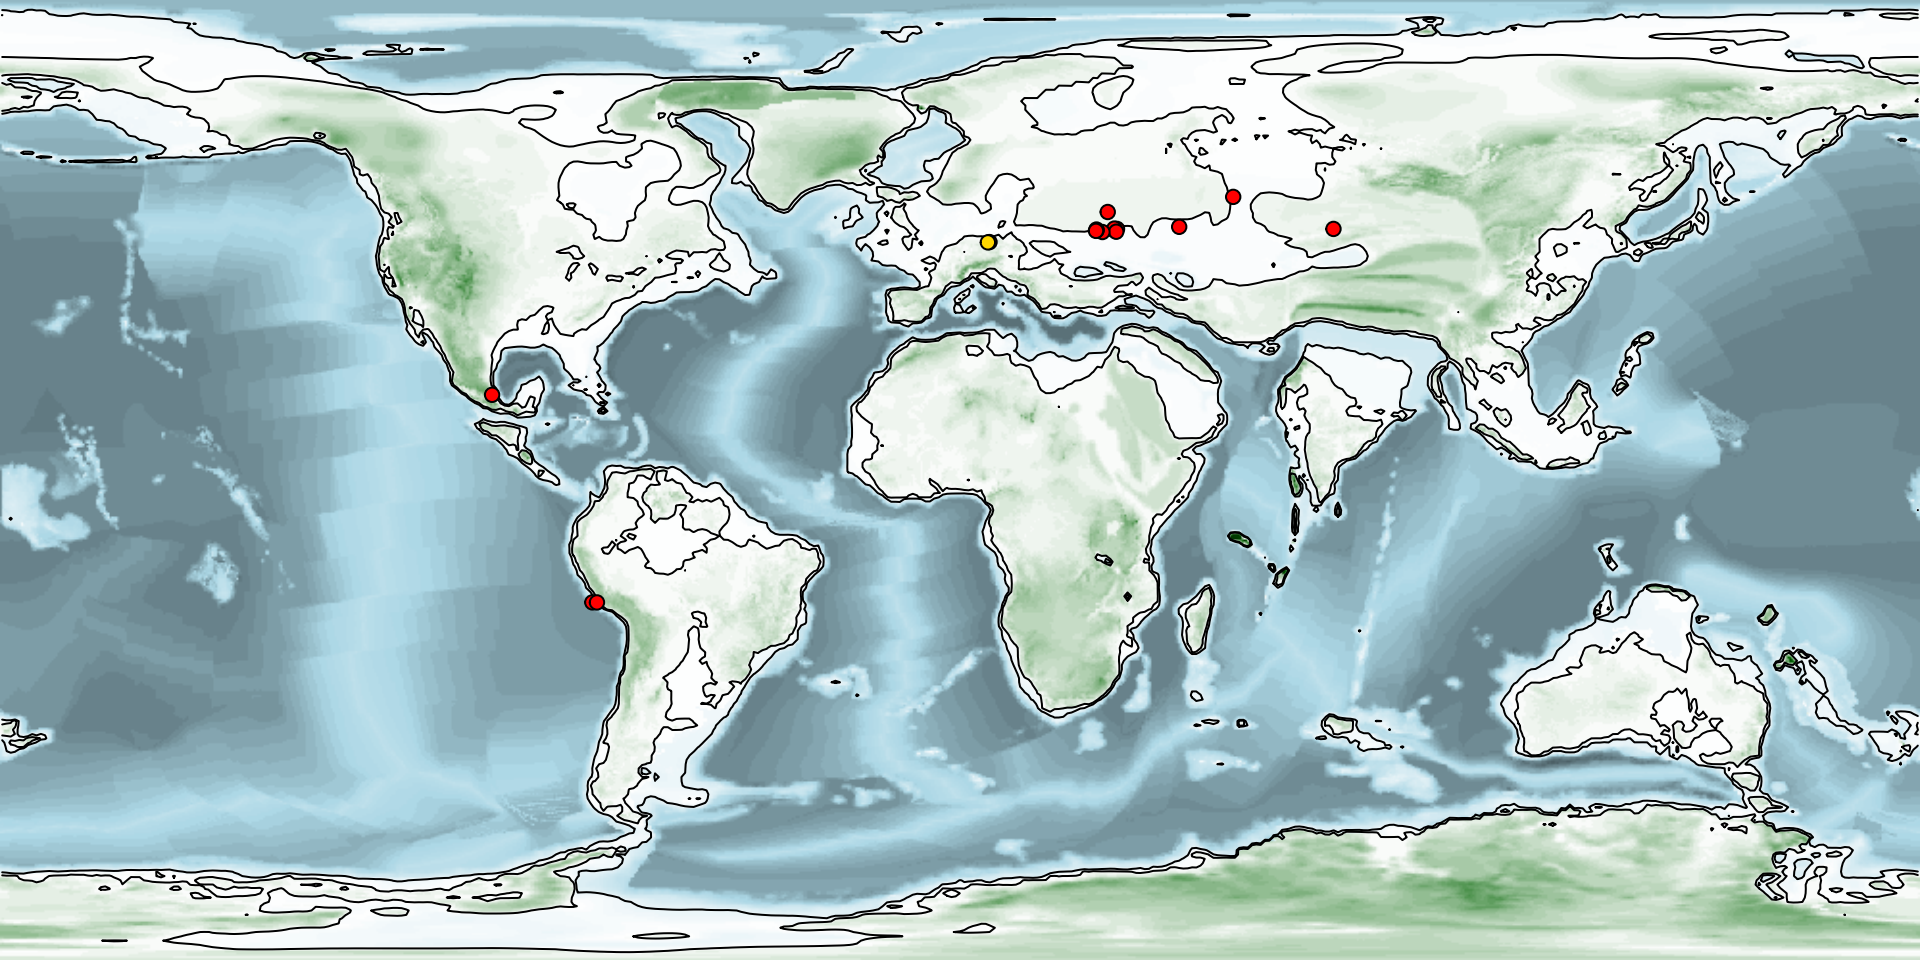

Supplement: Supplementary file 18 [file cp-20-2629-2024-supplement.zip]

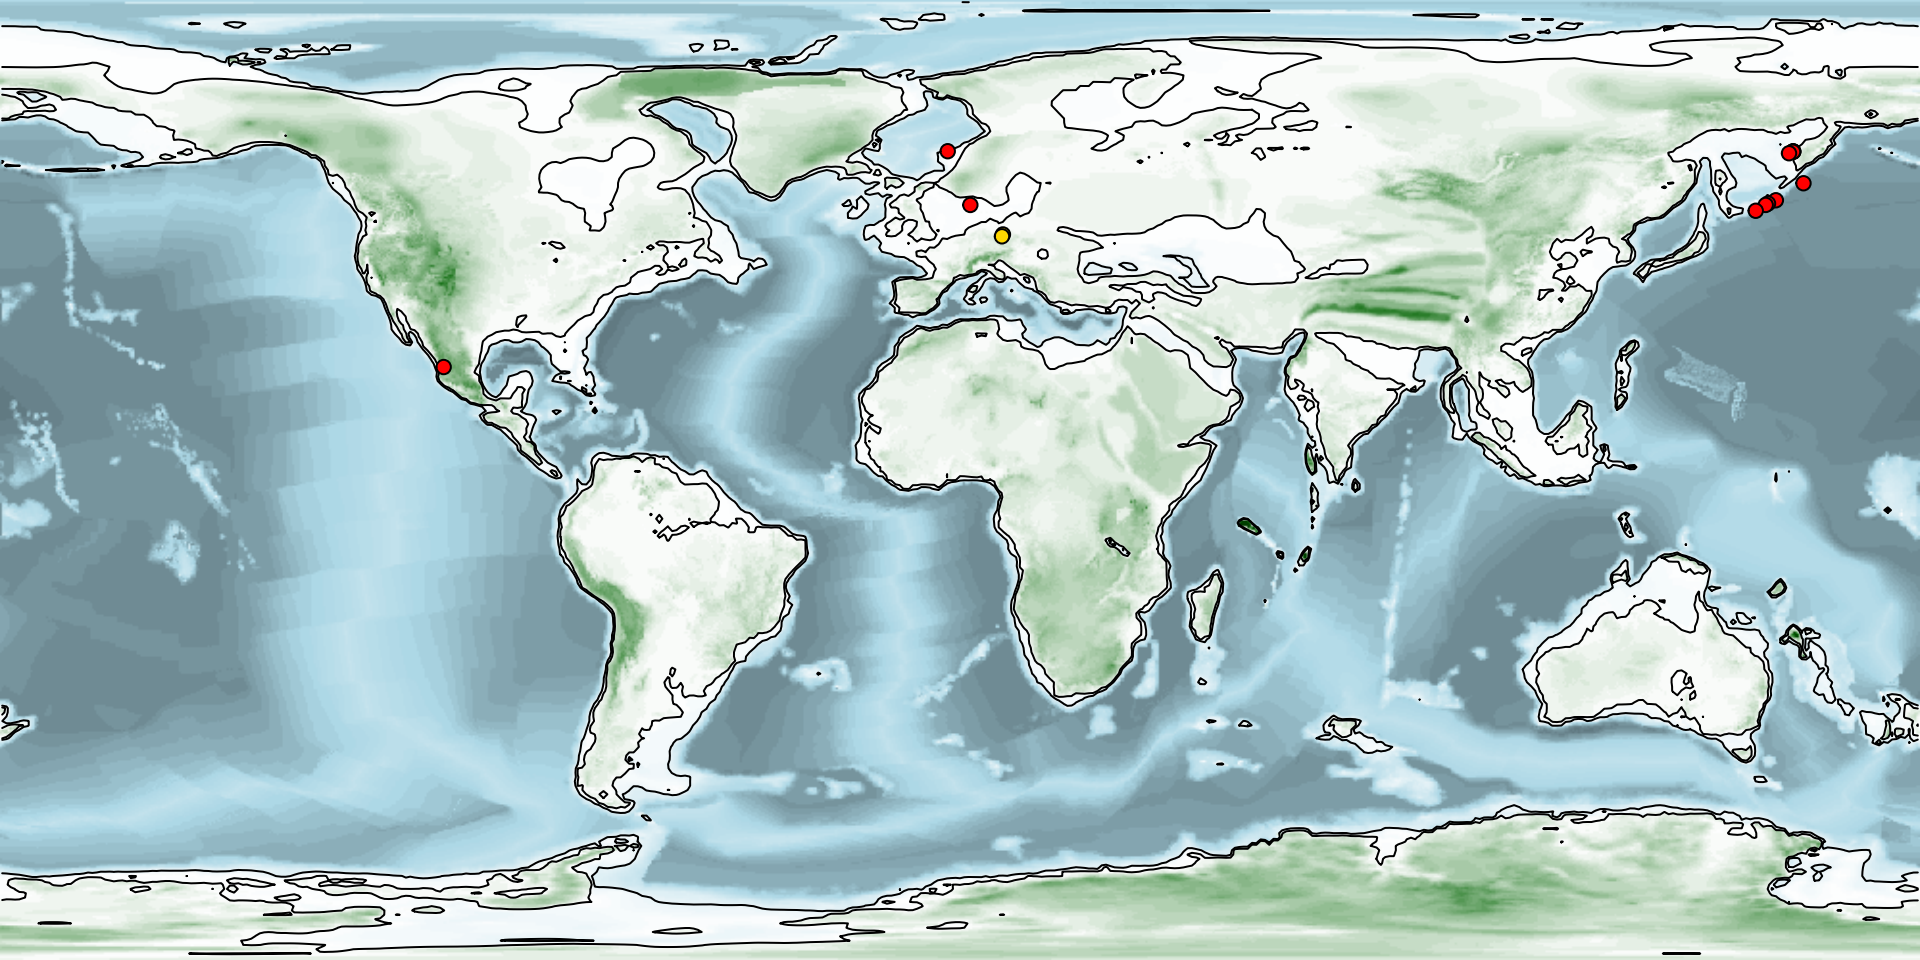

Supplement: Supplementary file 19 [file cp-20-2629-2024-supplement.zip]

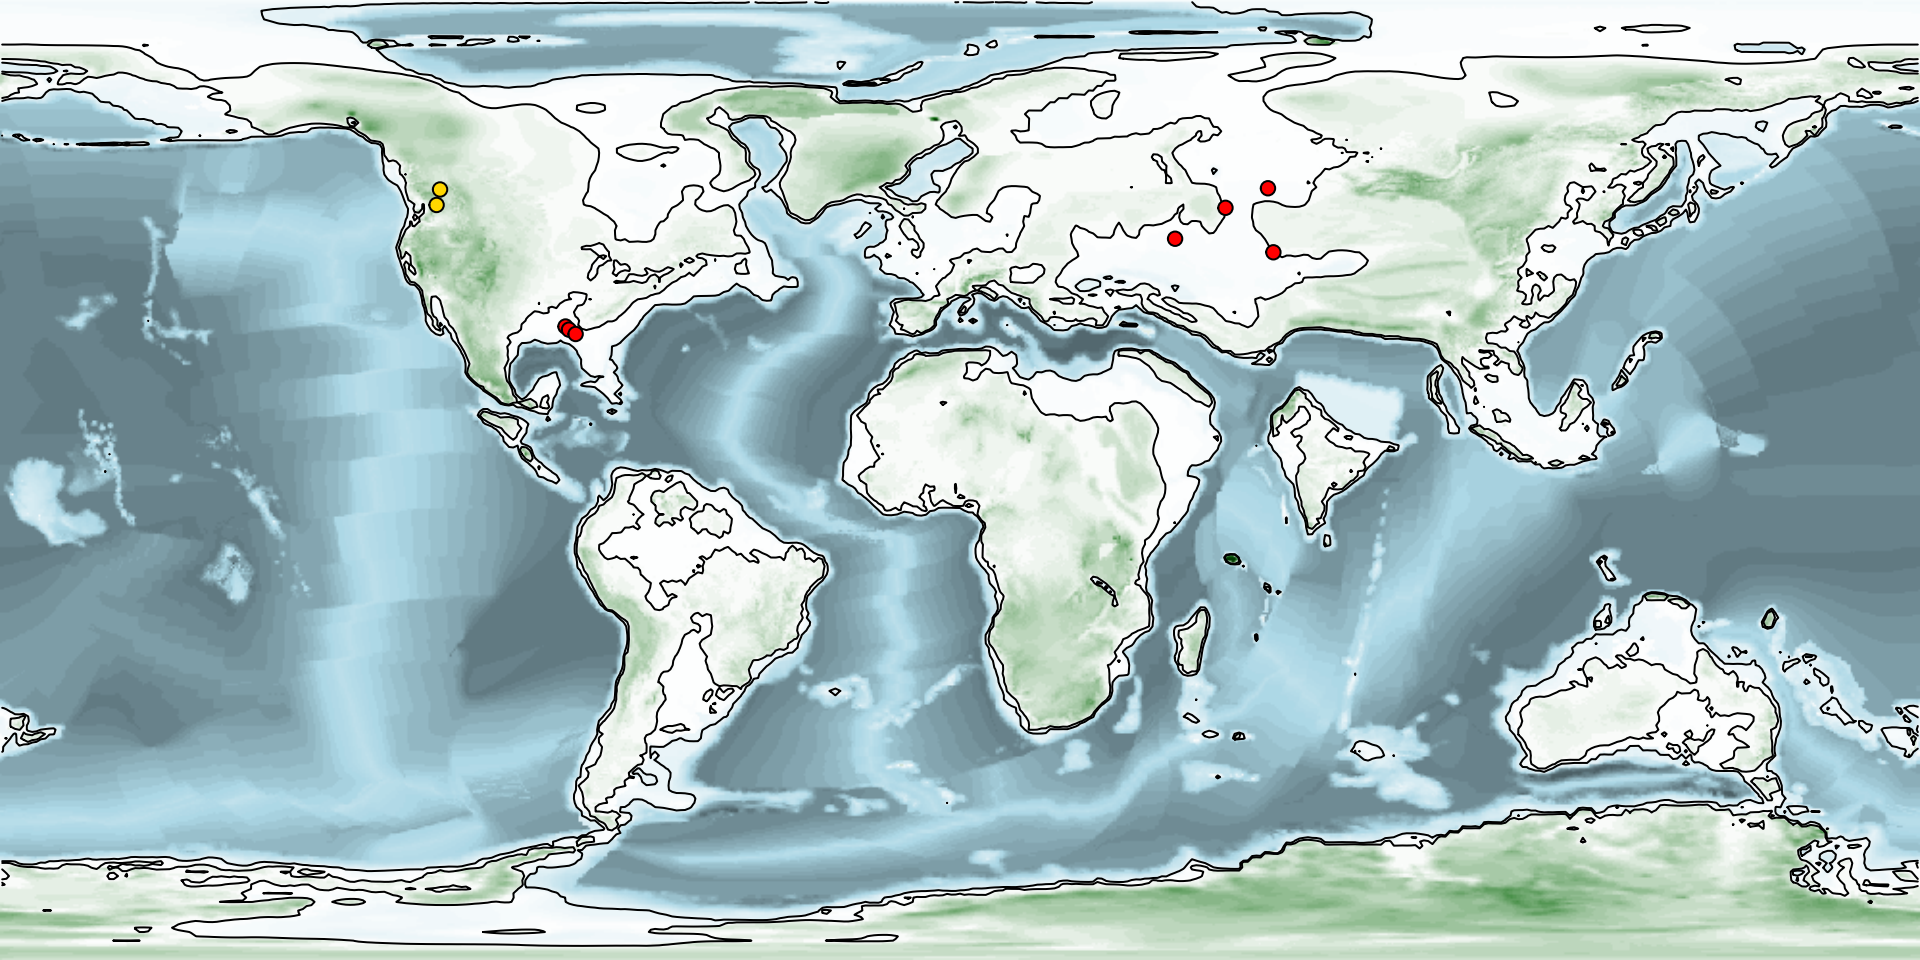

Supplement: Supplementary file 20 [file cp-20-2629-2024-supplement.zip]

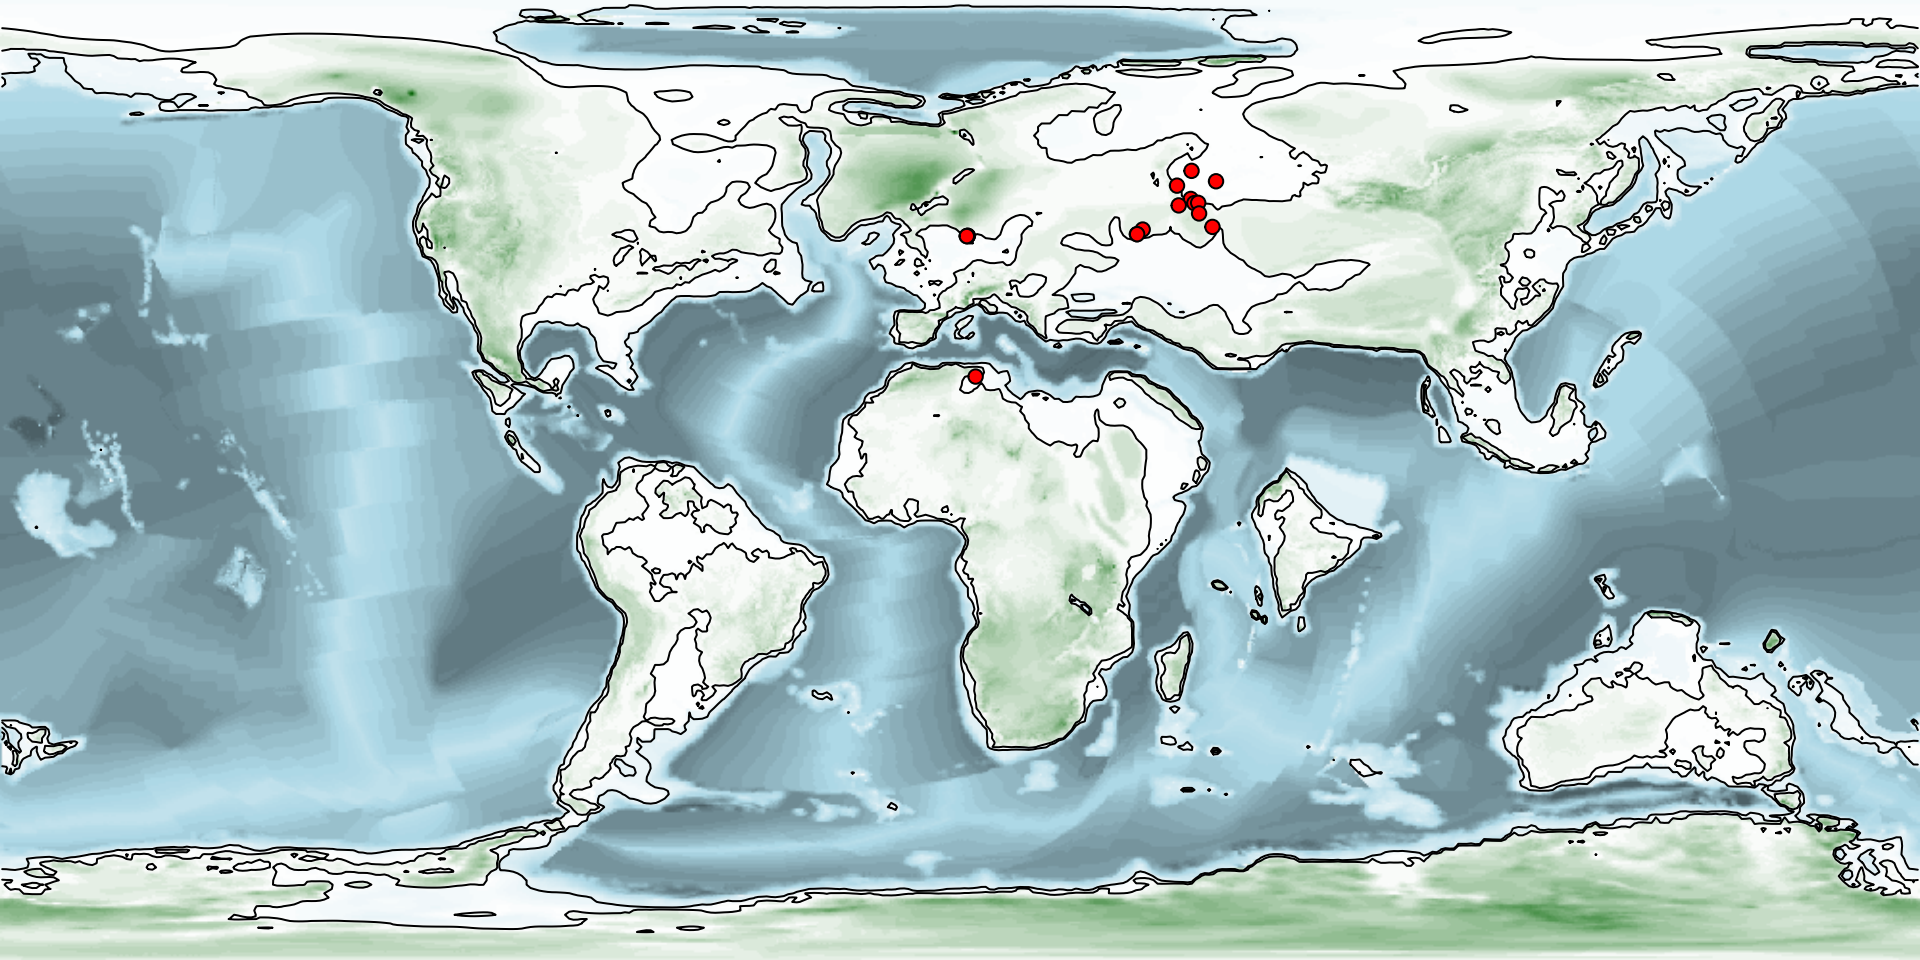

Supplement: Supplementary file 21 [file cp-20-2629-2024-supplement.zip]

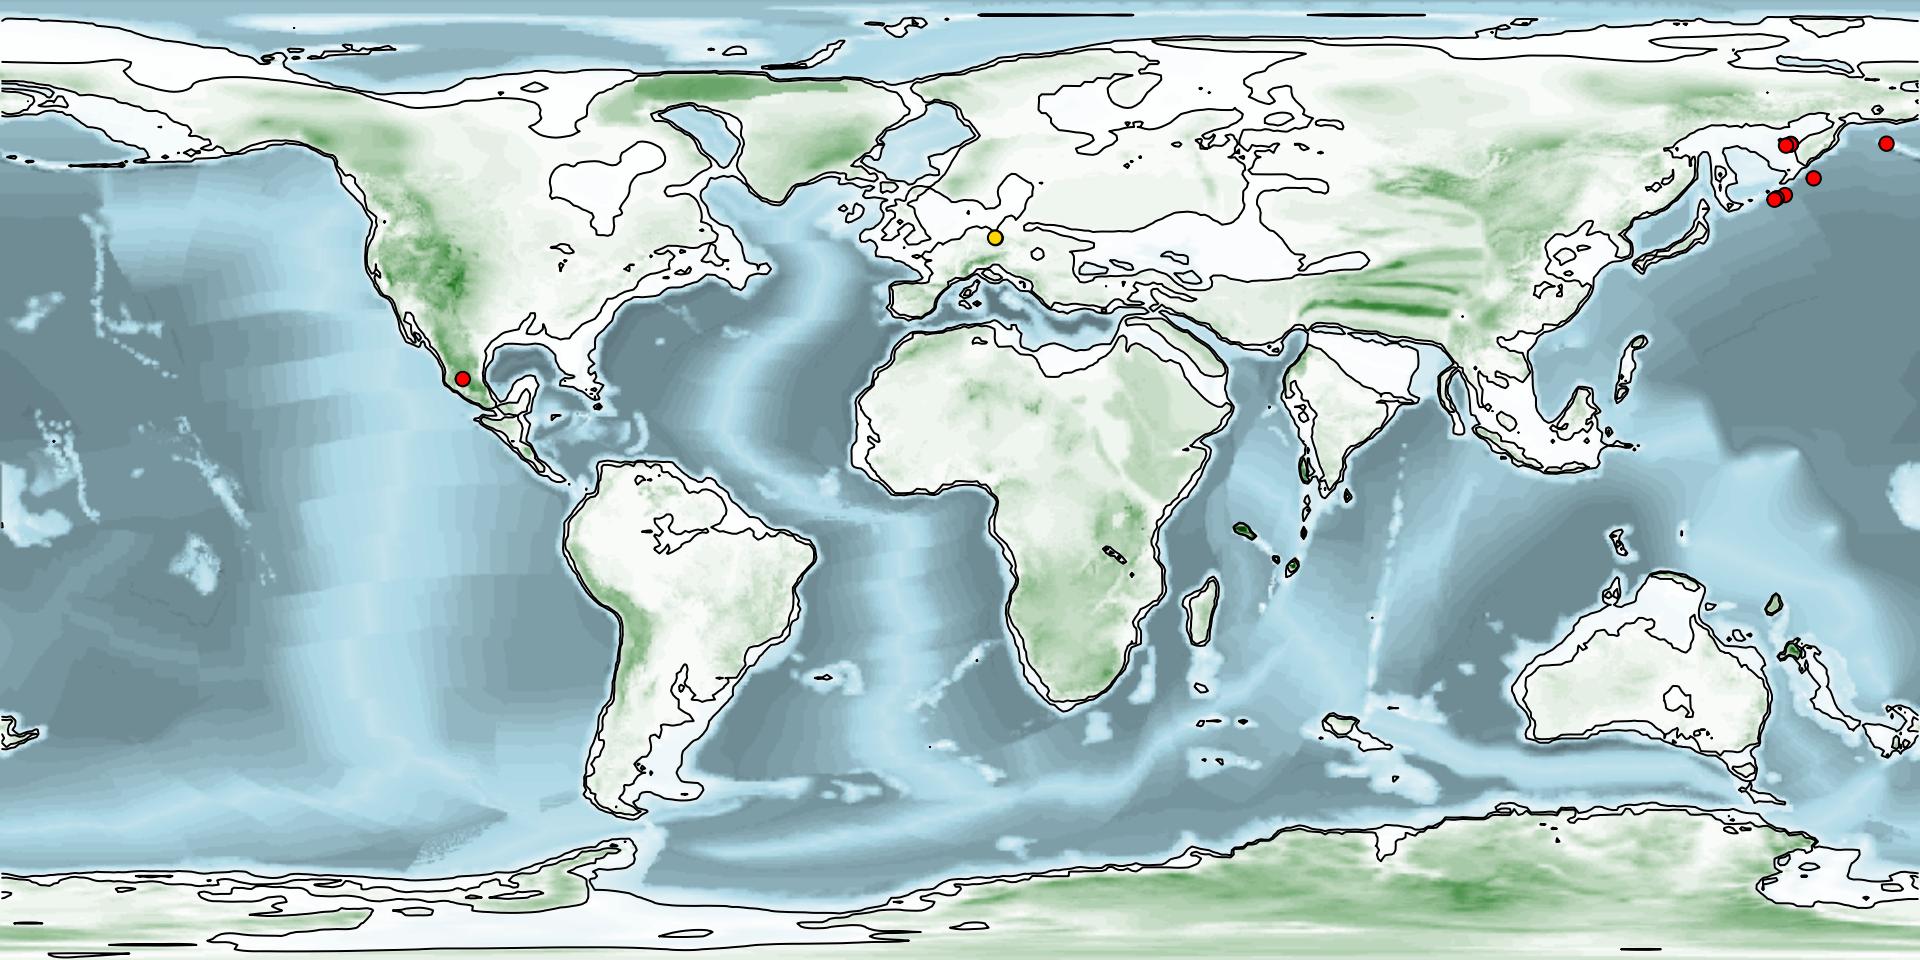

Supplement: Supplementary file 22 [file cp-20-2629-2024-supplement.zip]

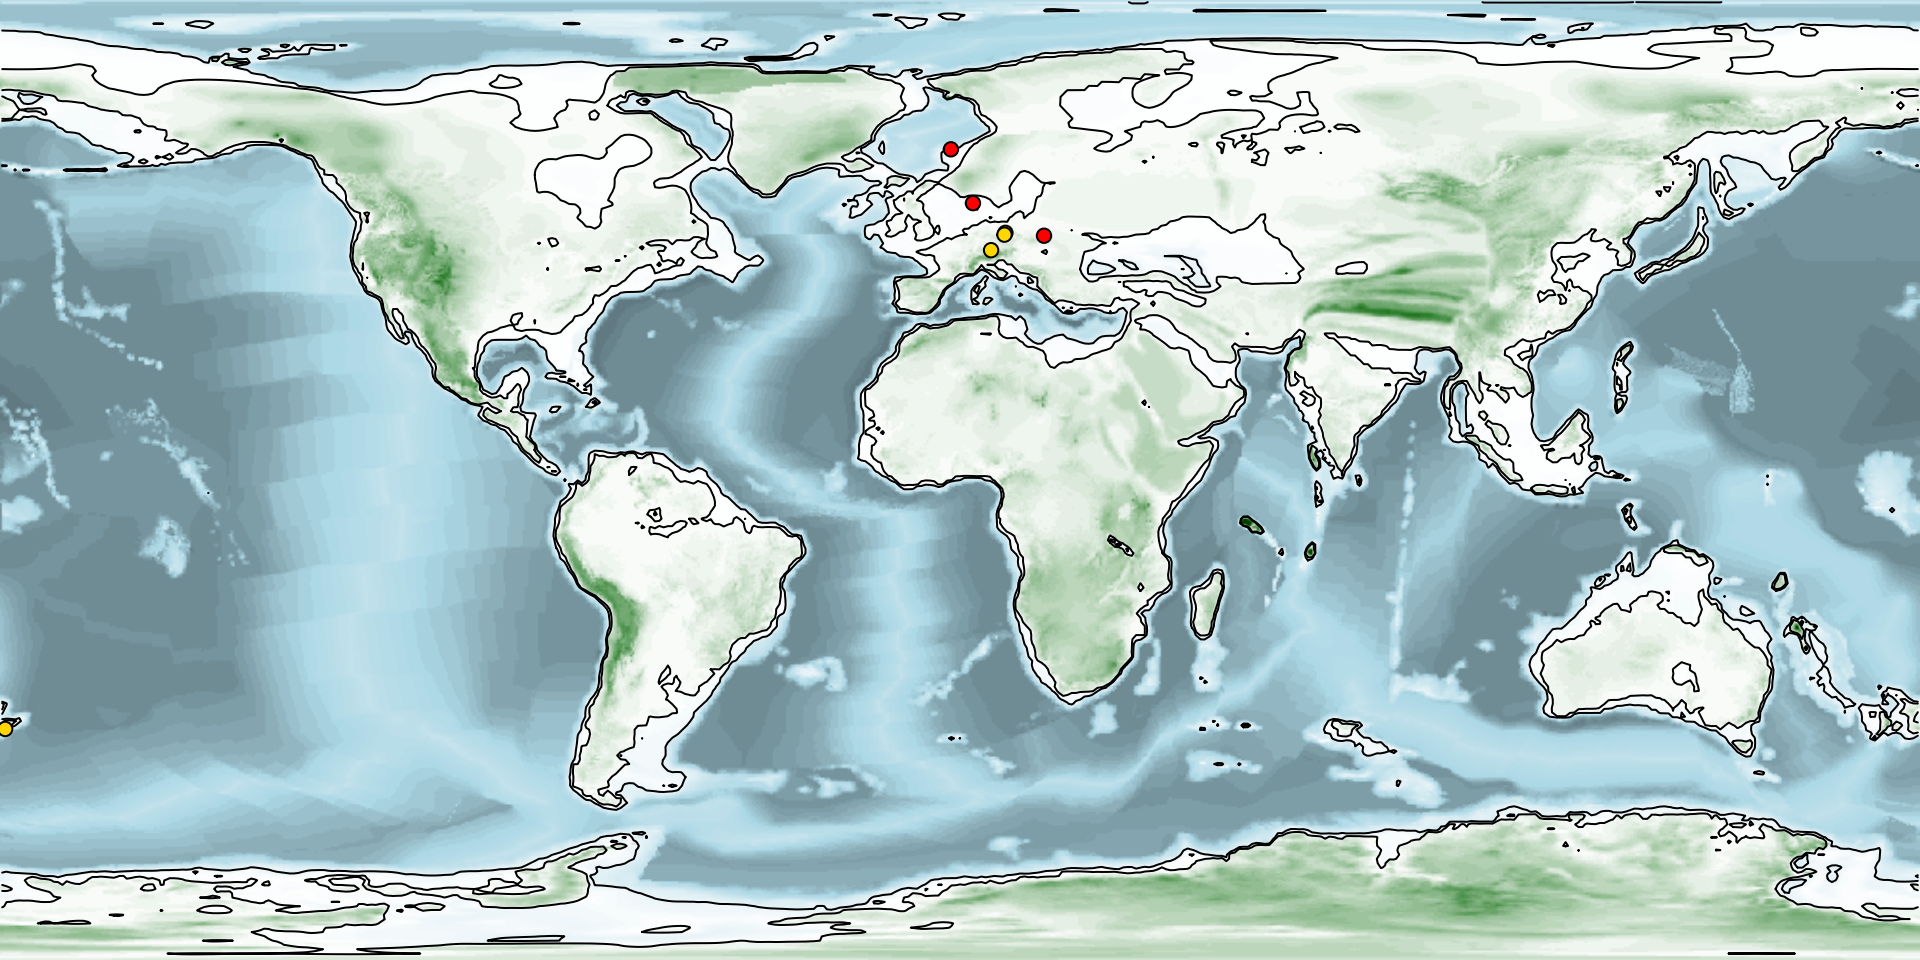

Supplement: Supplementary file 24 [file cp-20-2629-2024-supplement.zip]

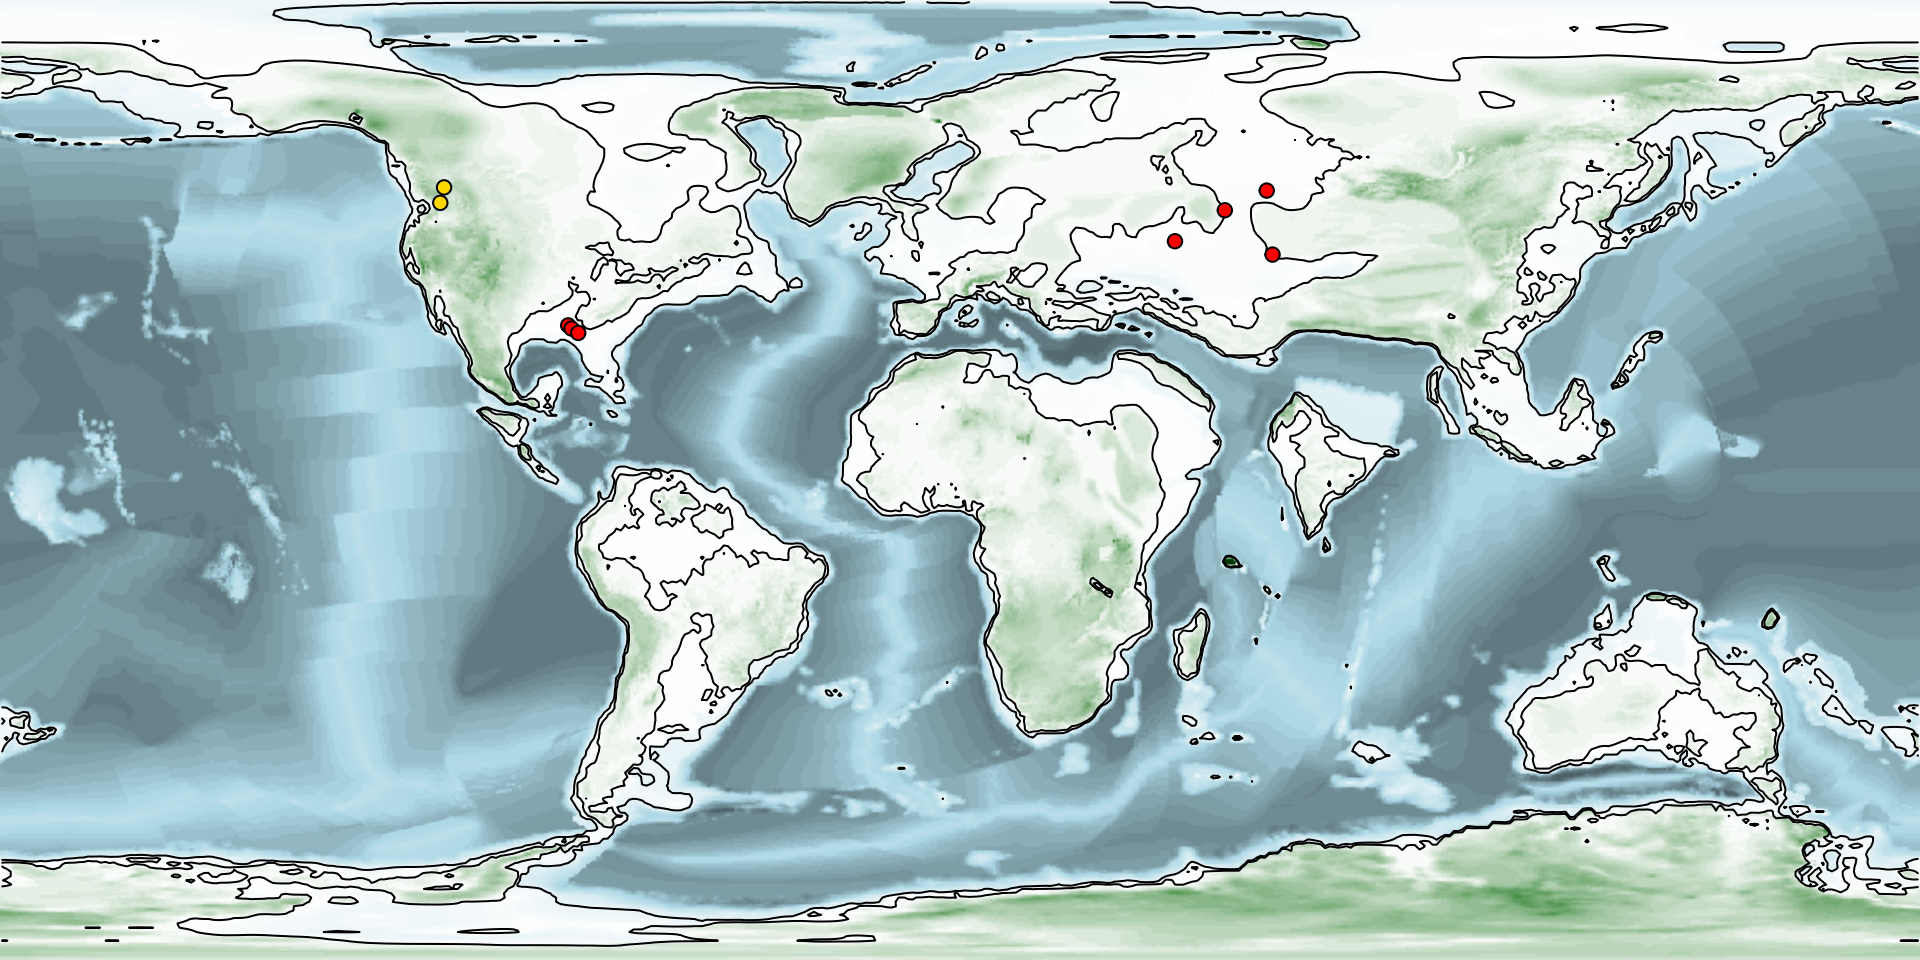

Supplement: Supplementary file 25 [file cp-20-2629-2024-supplement.zip]

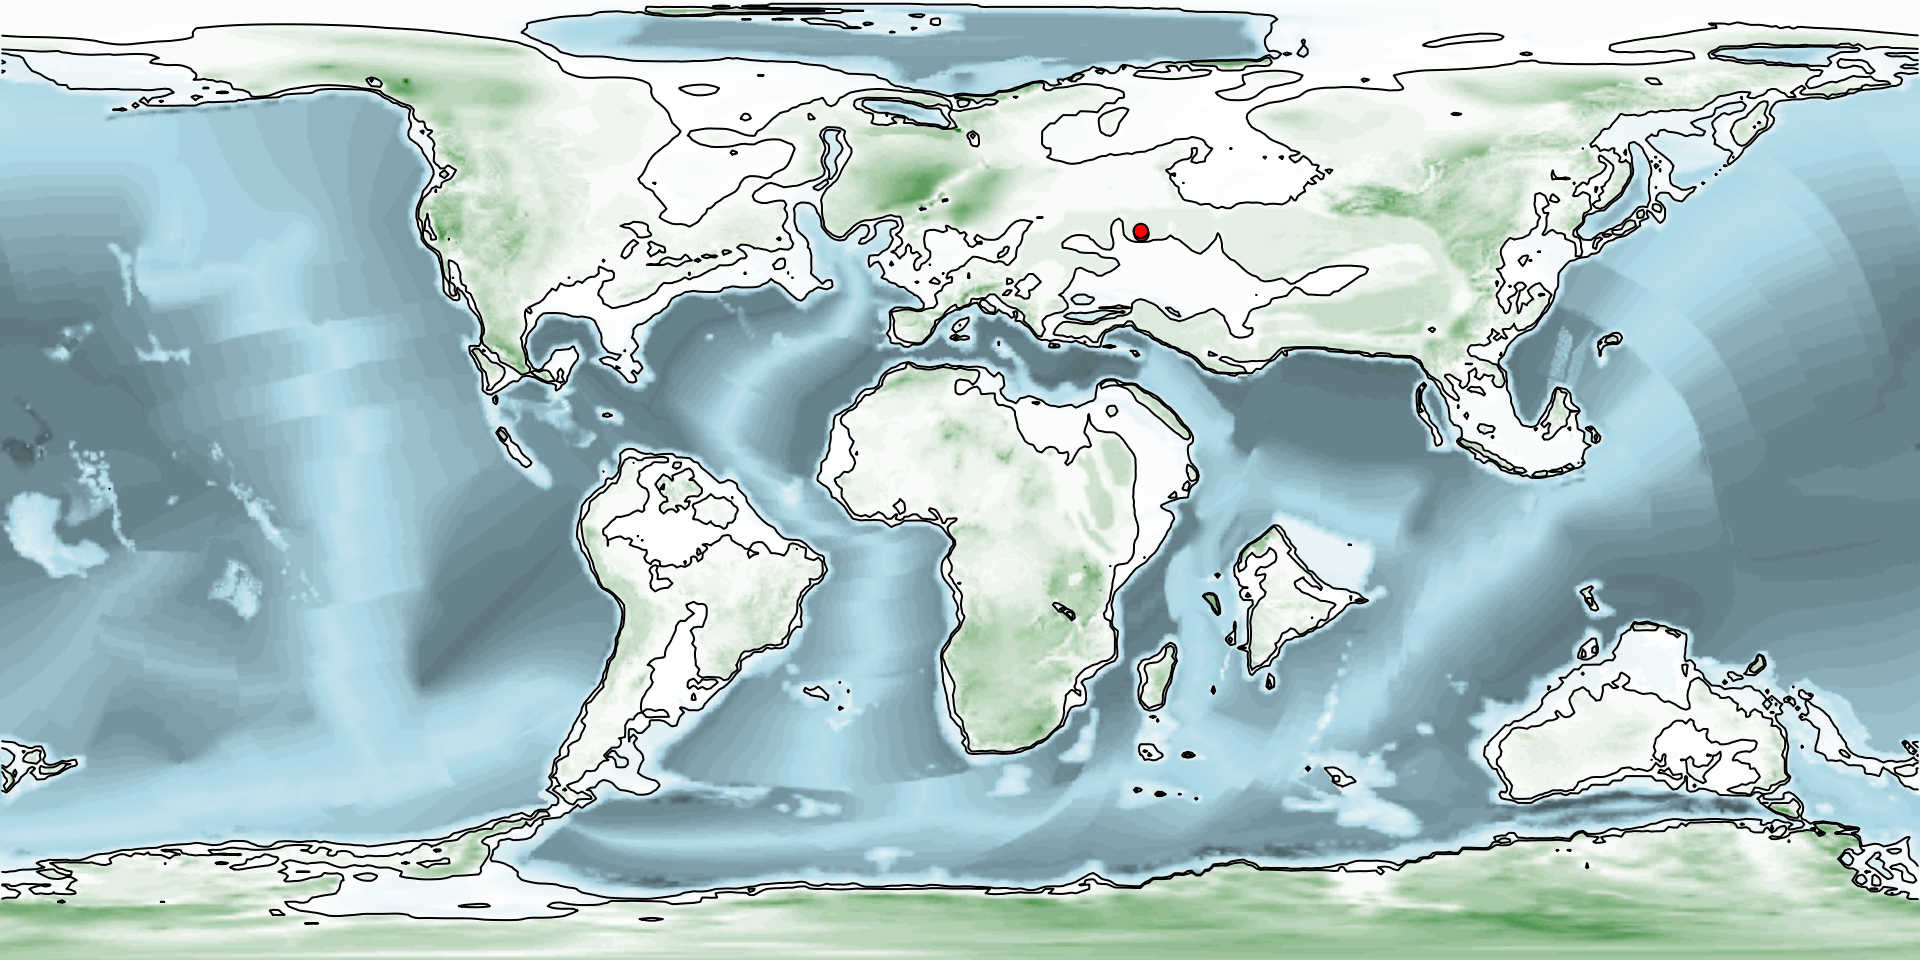

Supplement: Supplementary file 26 [file cp-20-2629-2024-supplement.zip]

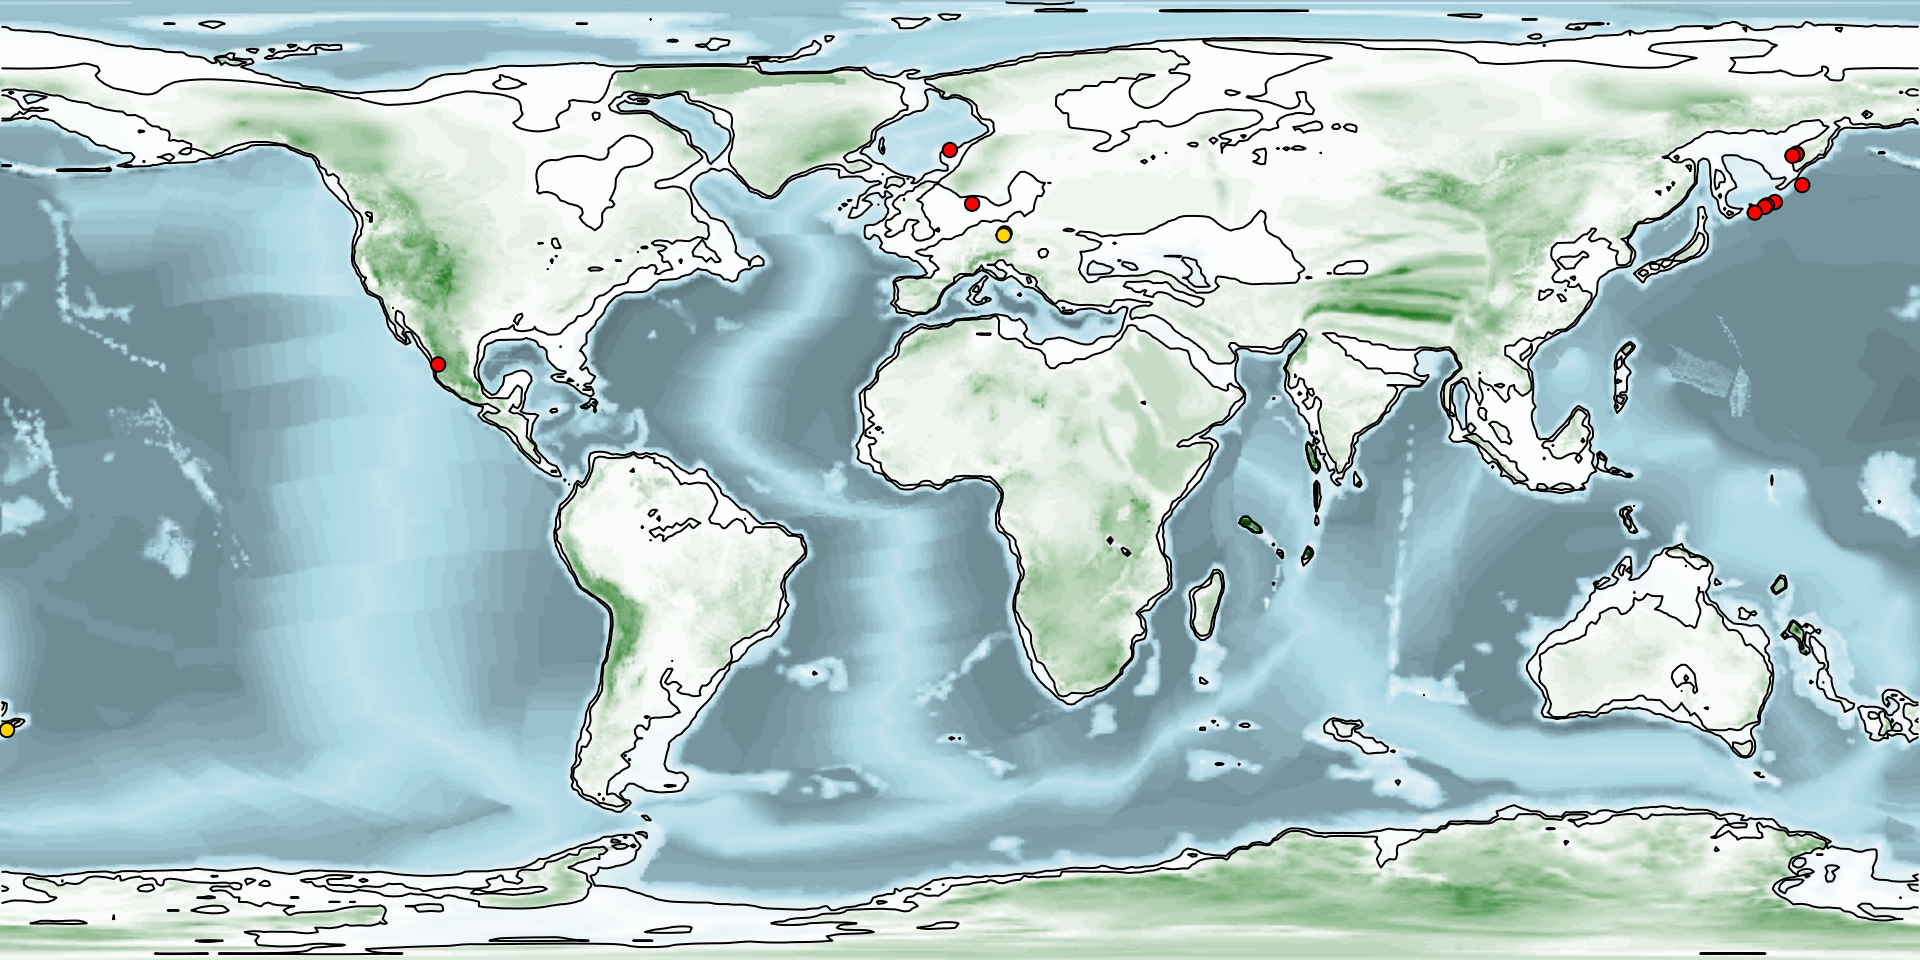

Supplement: Supplementary file 27 [file cp-20-2629-2024-supplement.zip]

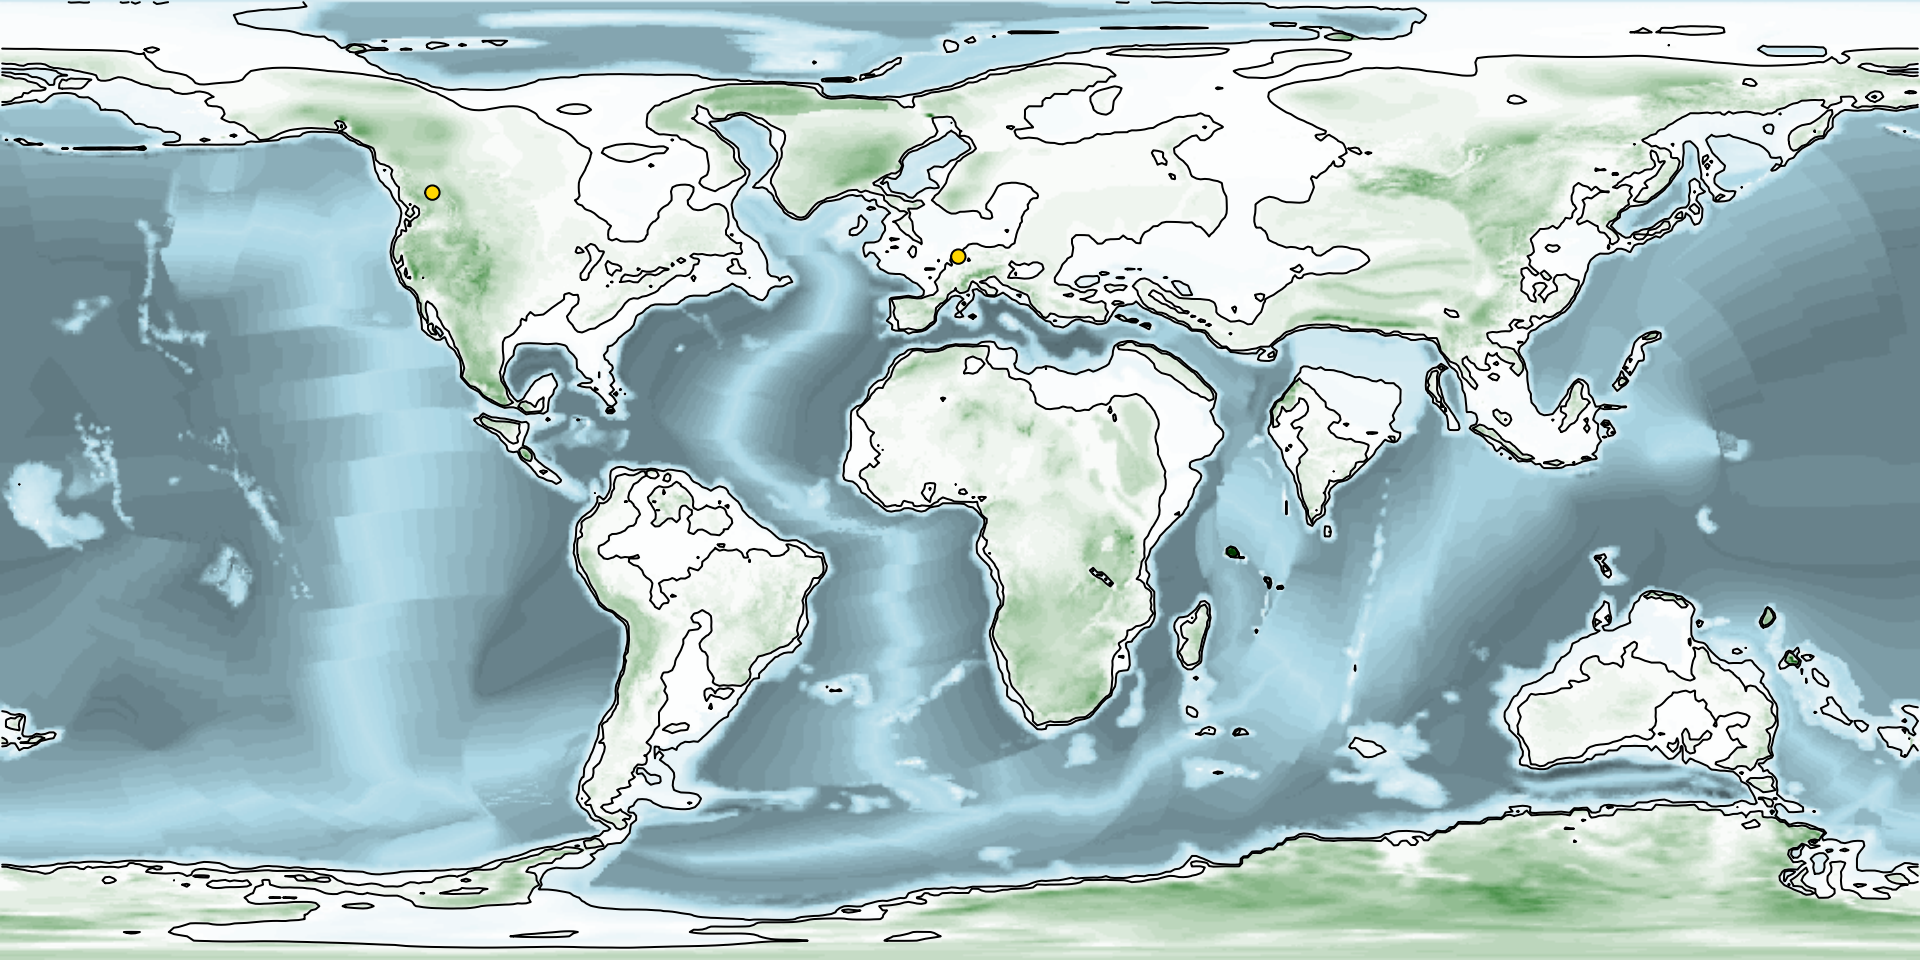

Supplement: Supplementary file 28 [file cp-20-2629-2024-supplement.zip]

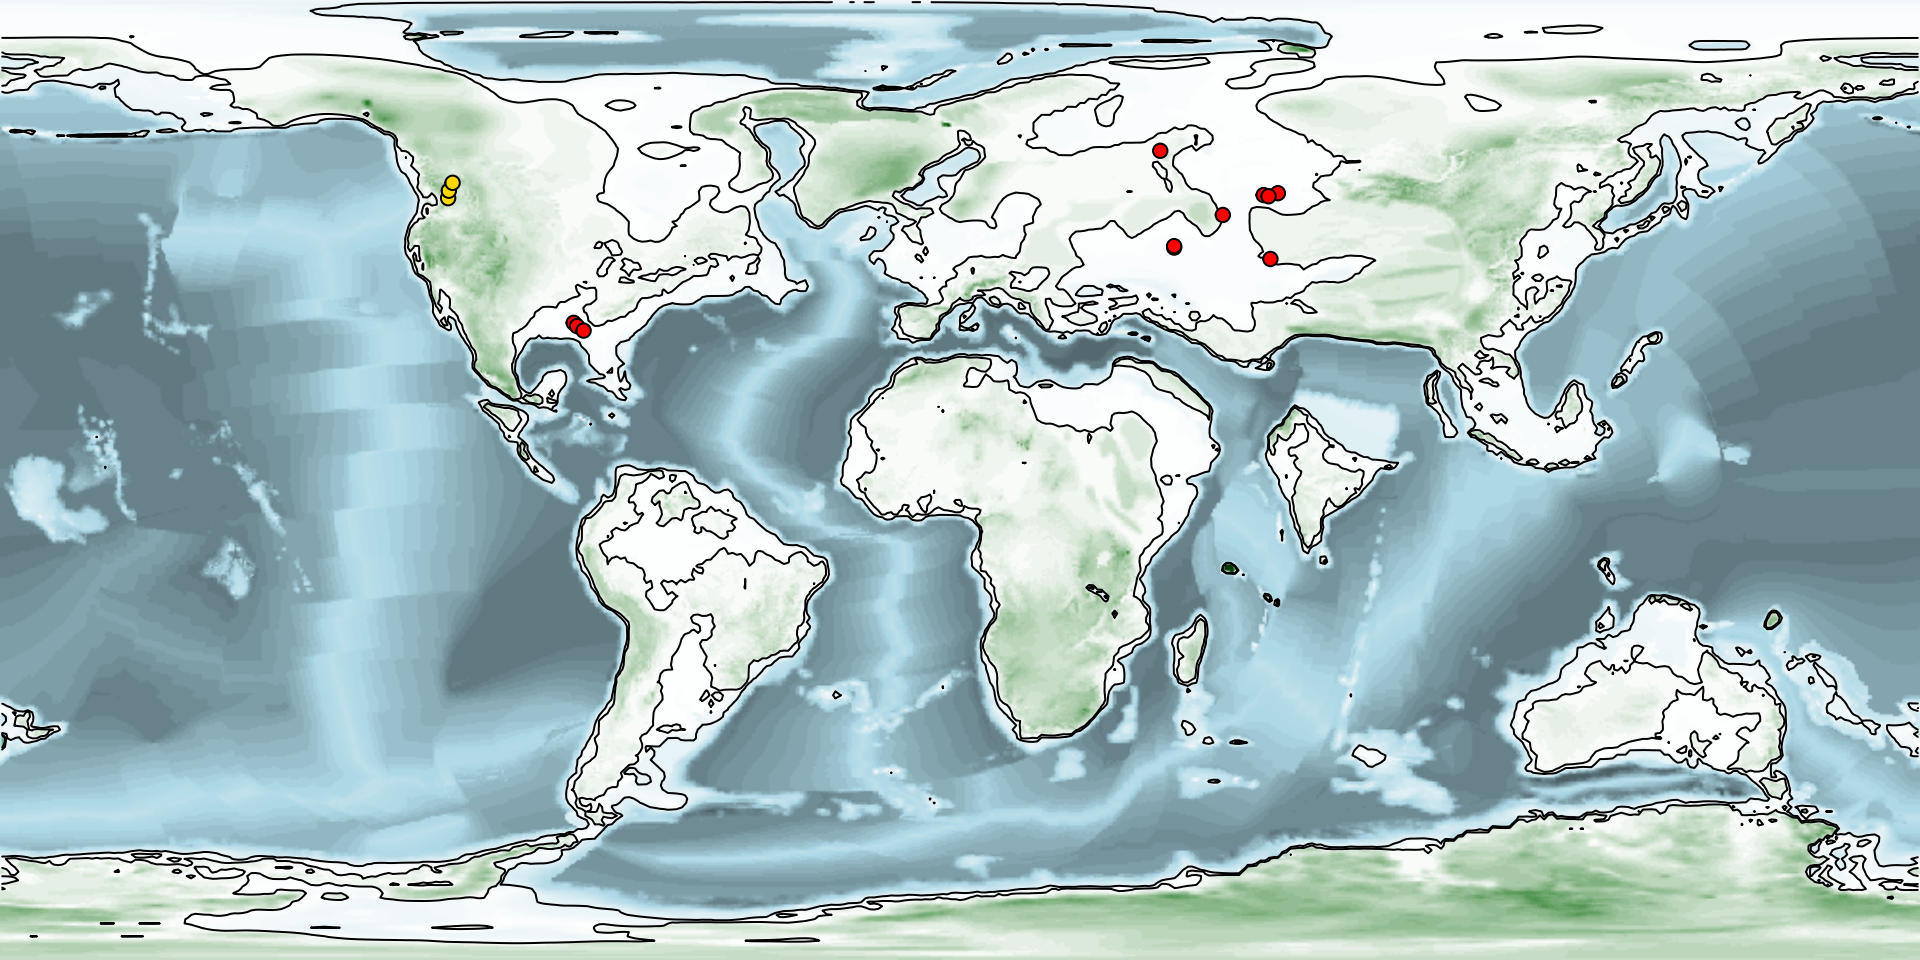

Supplement: Supplementary file 29 [file cp-20-2629-2024-supplement.zip]

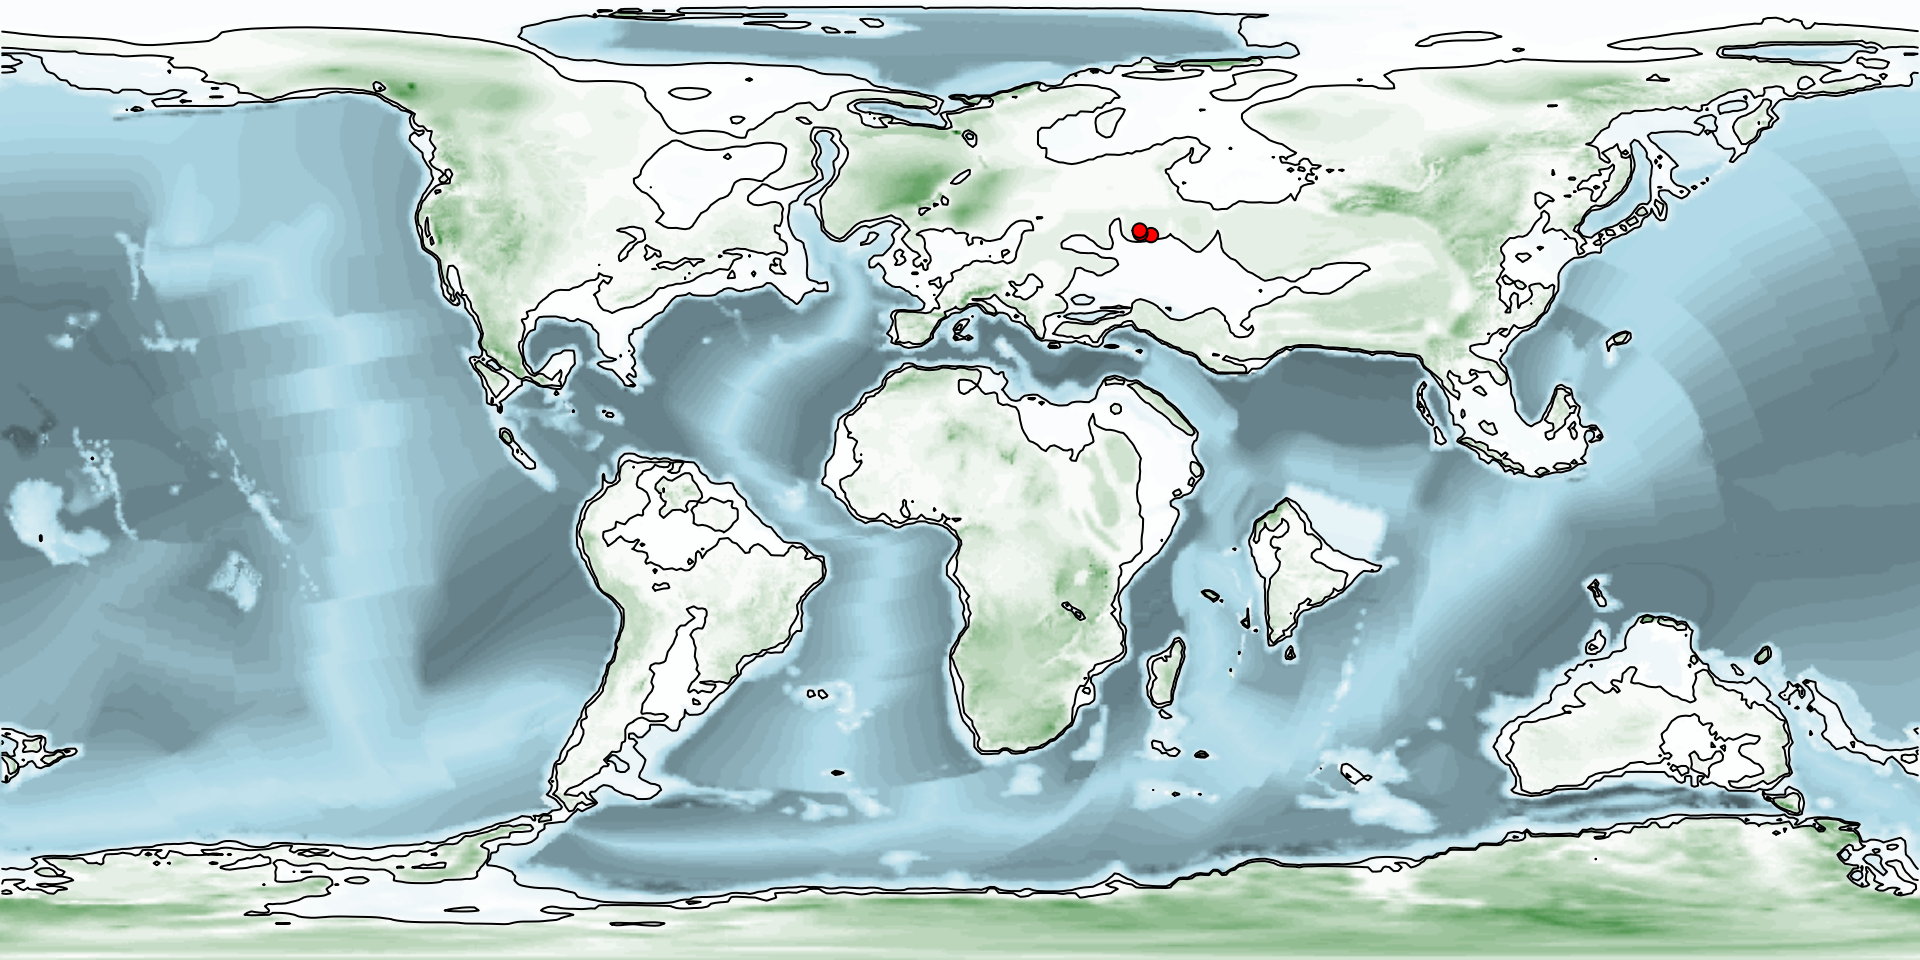

Supplement: Supplementary file 30 [file cp-20-2629-2024-supplement.zip]

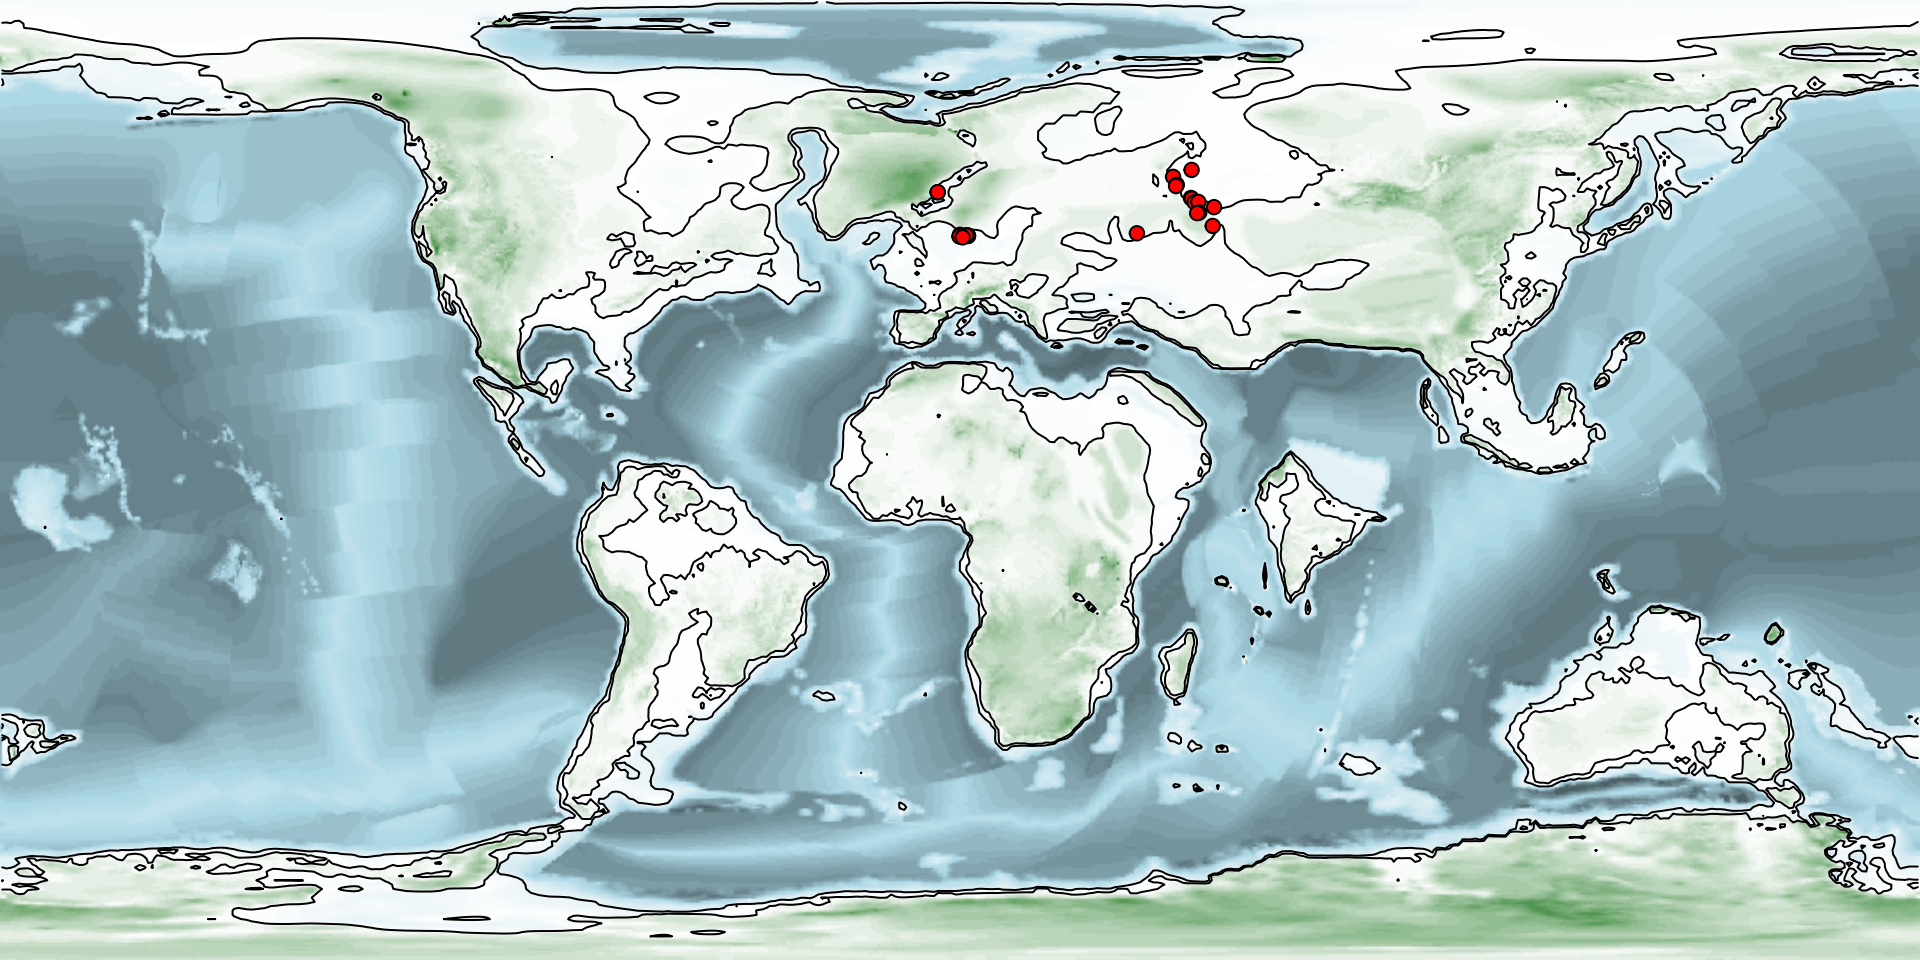

Supplement: Supplementary file 31 [file cp-20-2629-2024-supplement.zip]

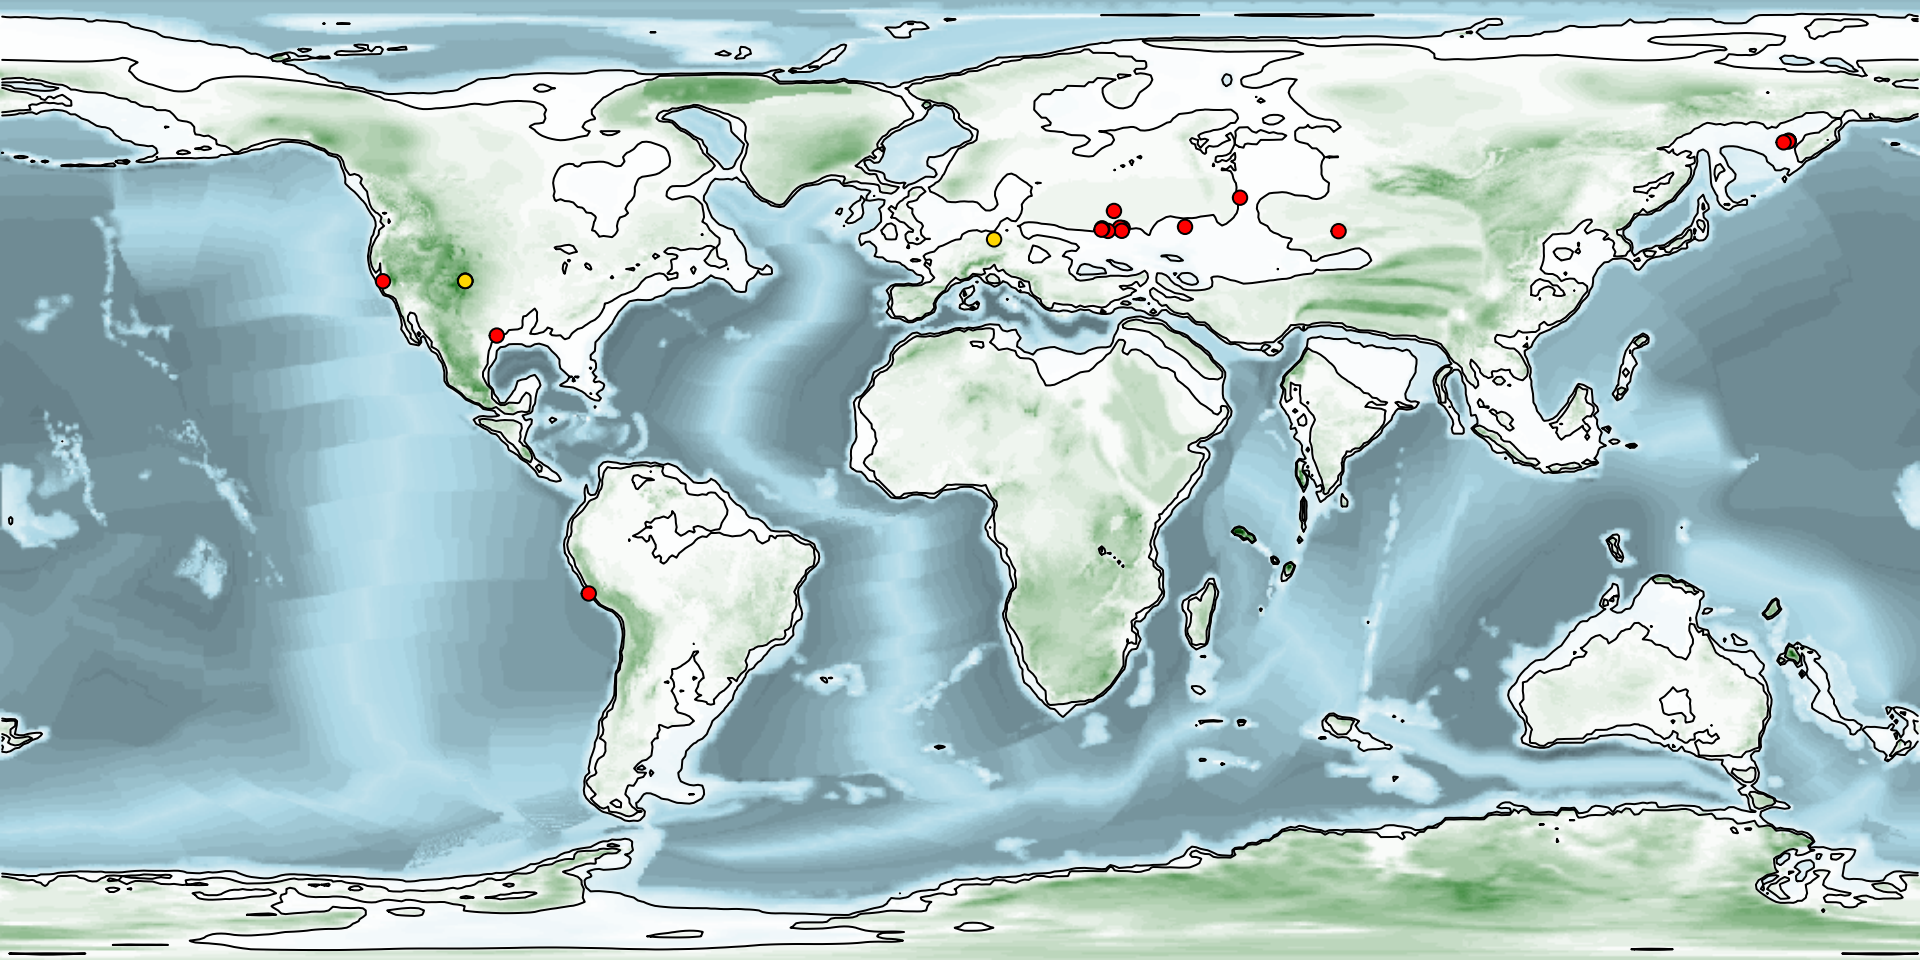

Supplement: Supplementary file 32 [file cp-20-2629-2024-supplement.zip]

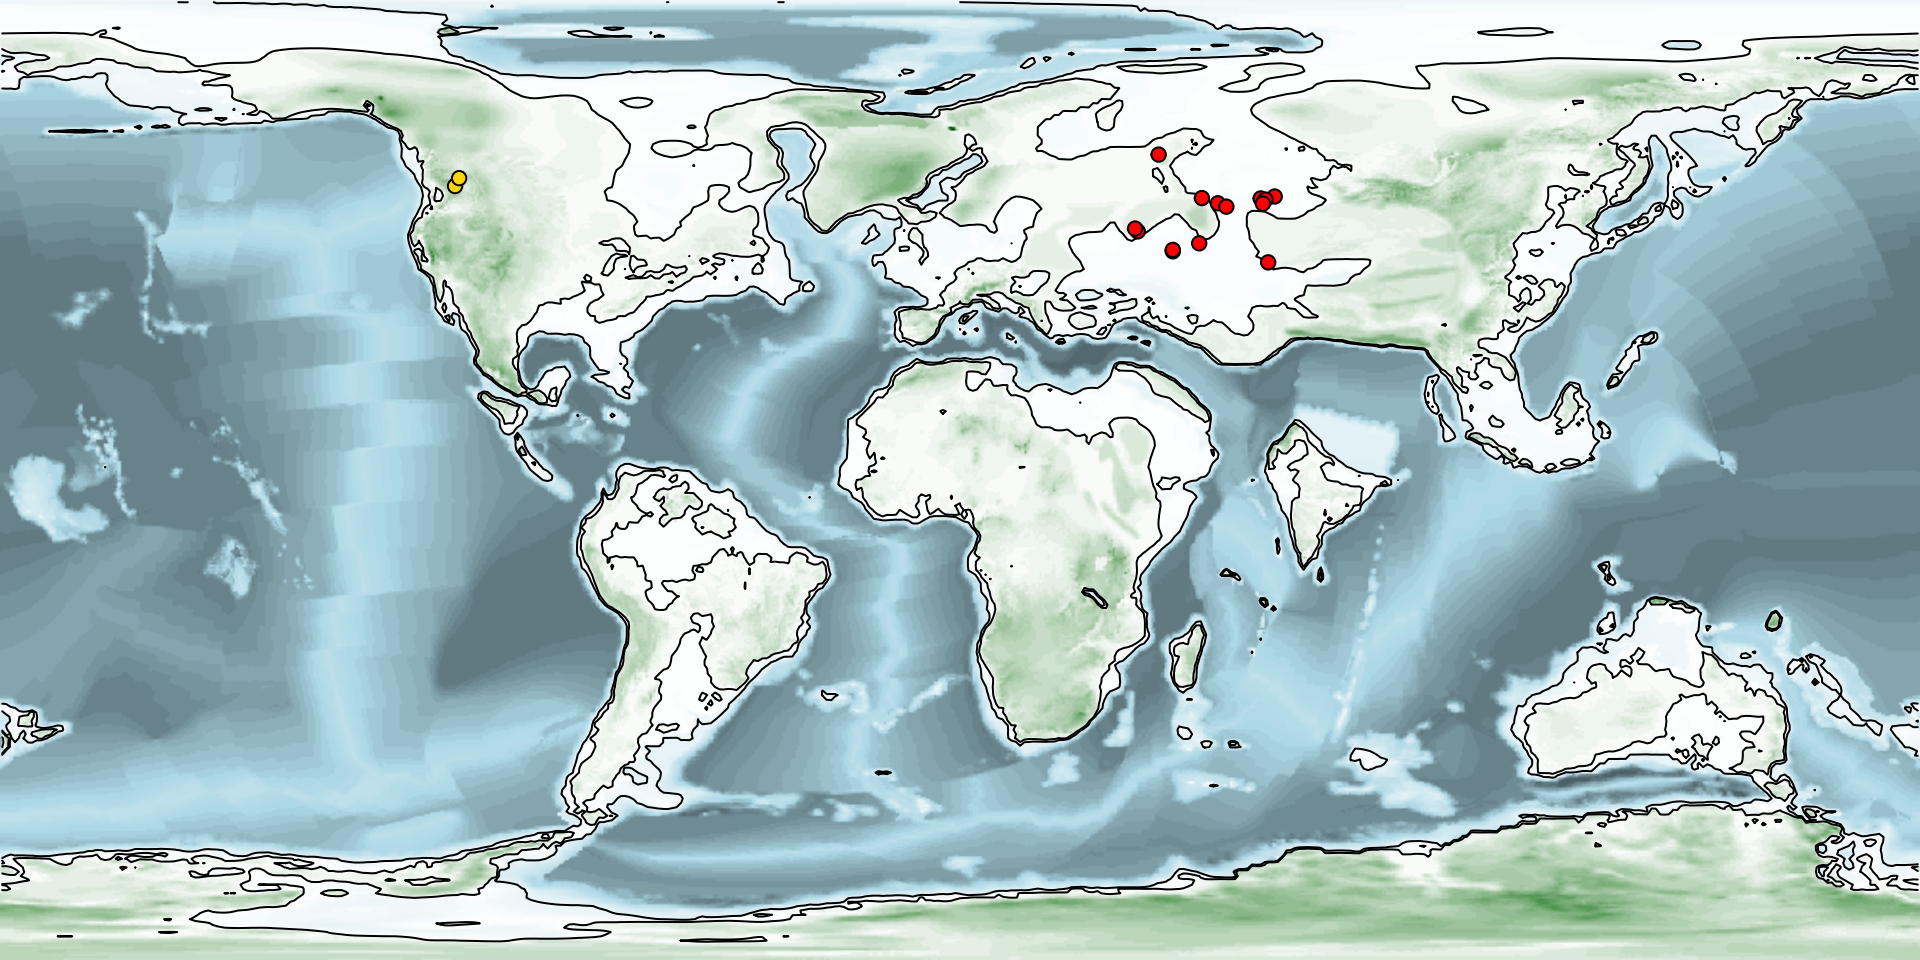

Supplement: Supplementary file 33 [file cp-20-2629-2024-supplement.zip]

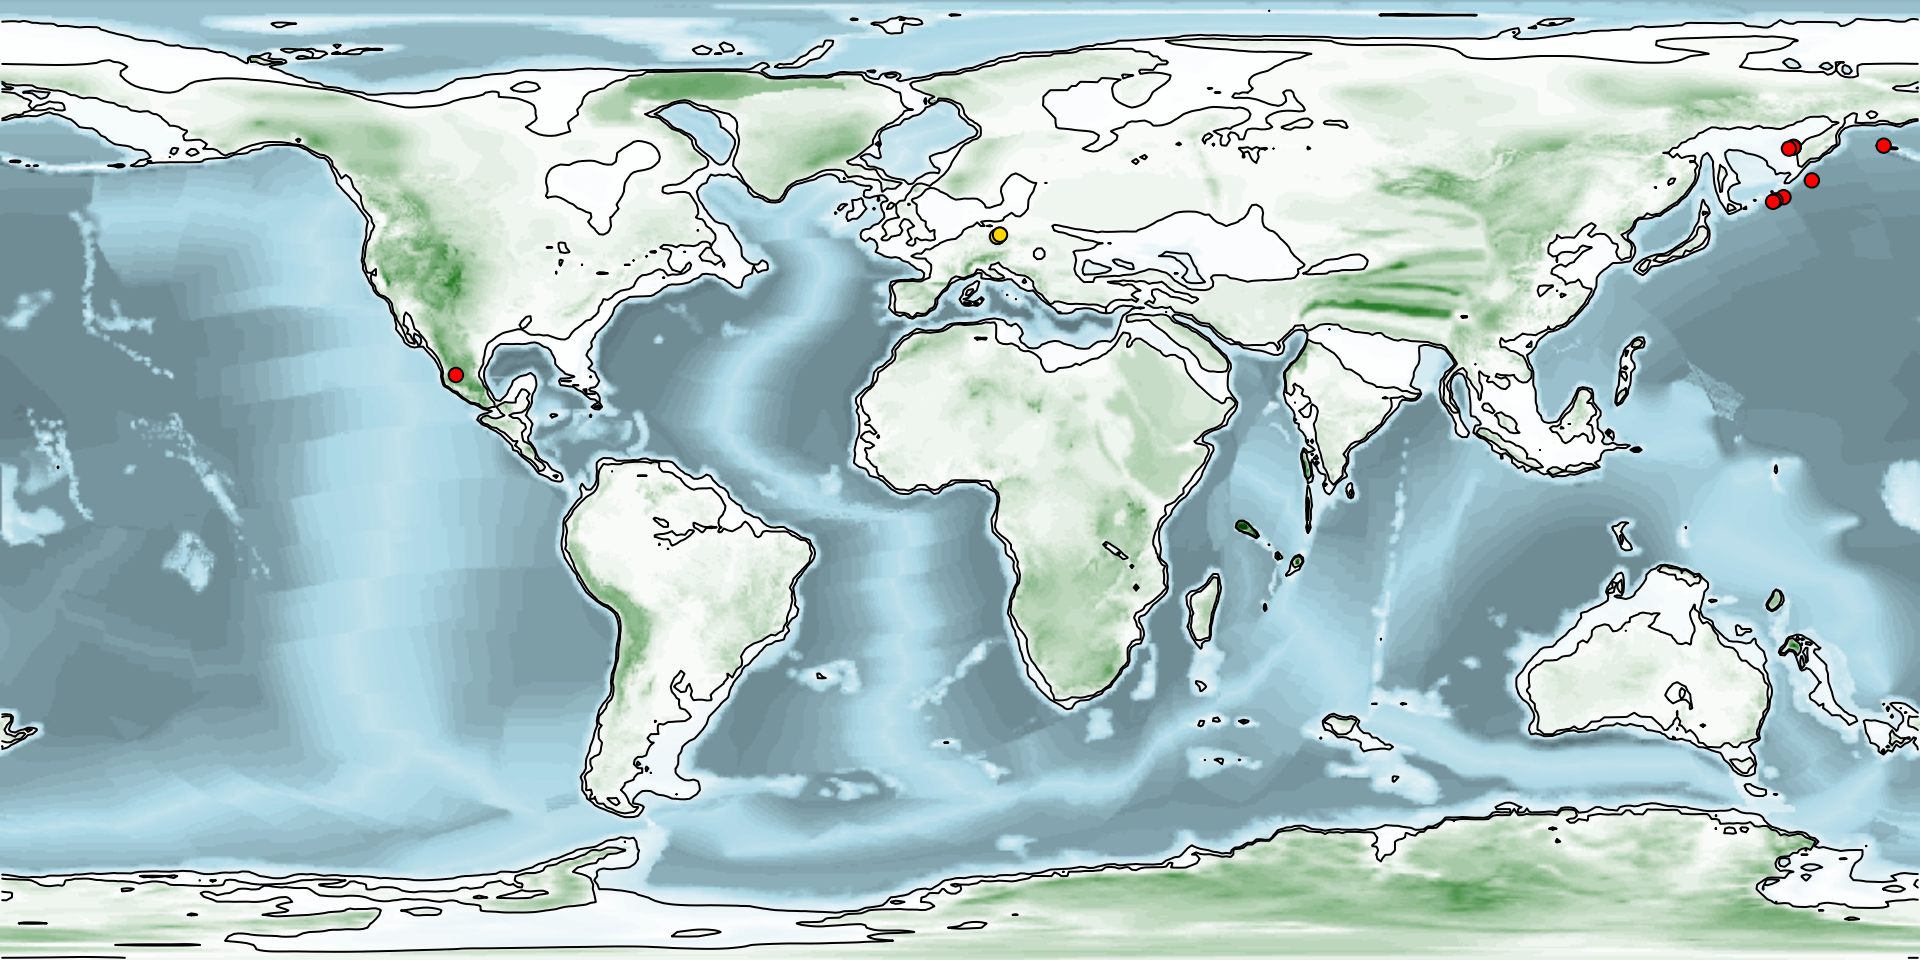

Supplement: Supplementary file 34 [file cp-20-2629-2024-supplement.zip]

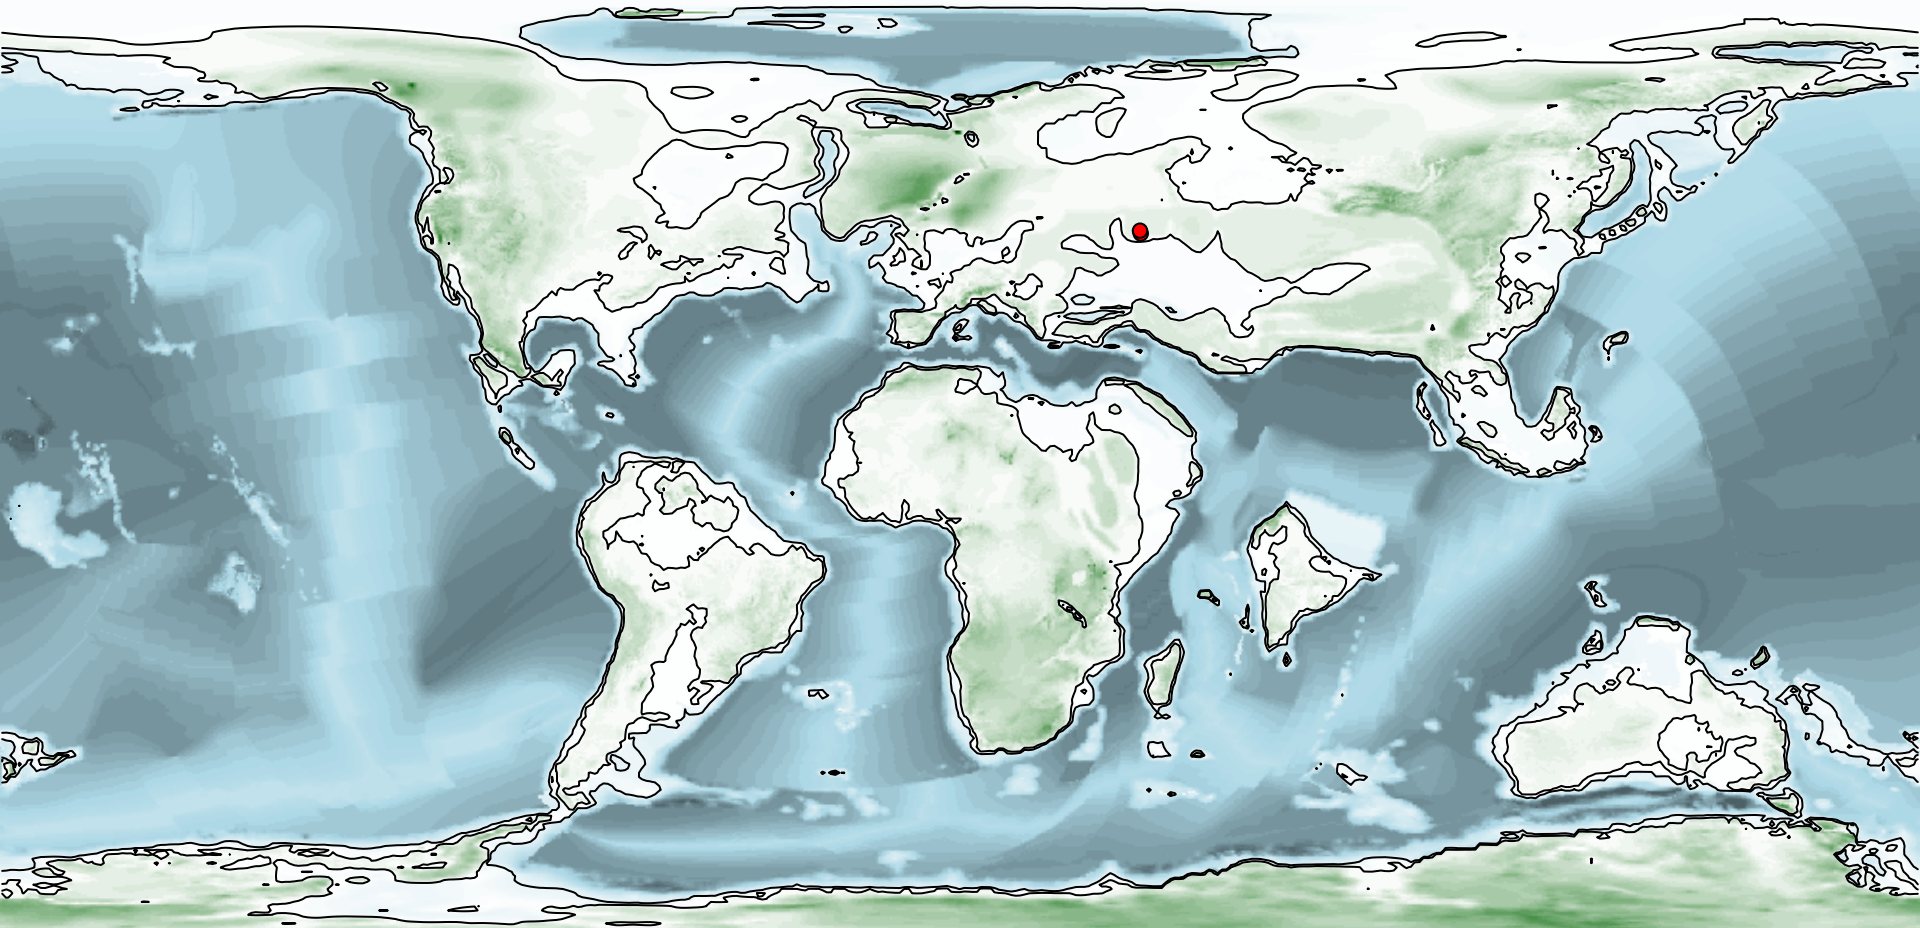

Supplement: Supplementary file 35 [file cp-20-2629-2024-supplement.zip]

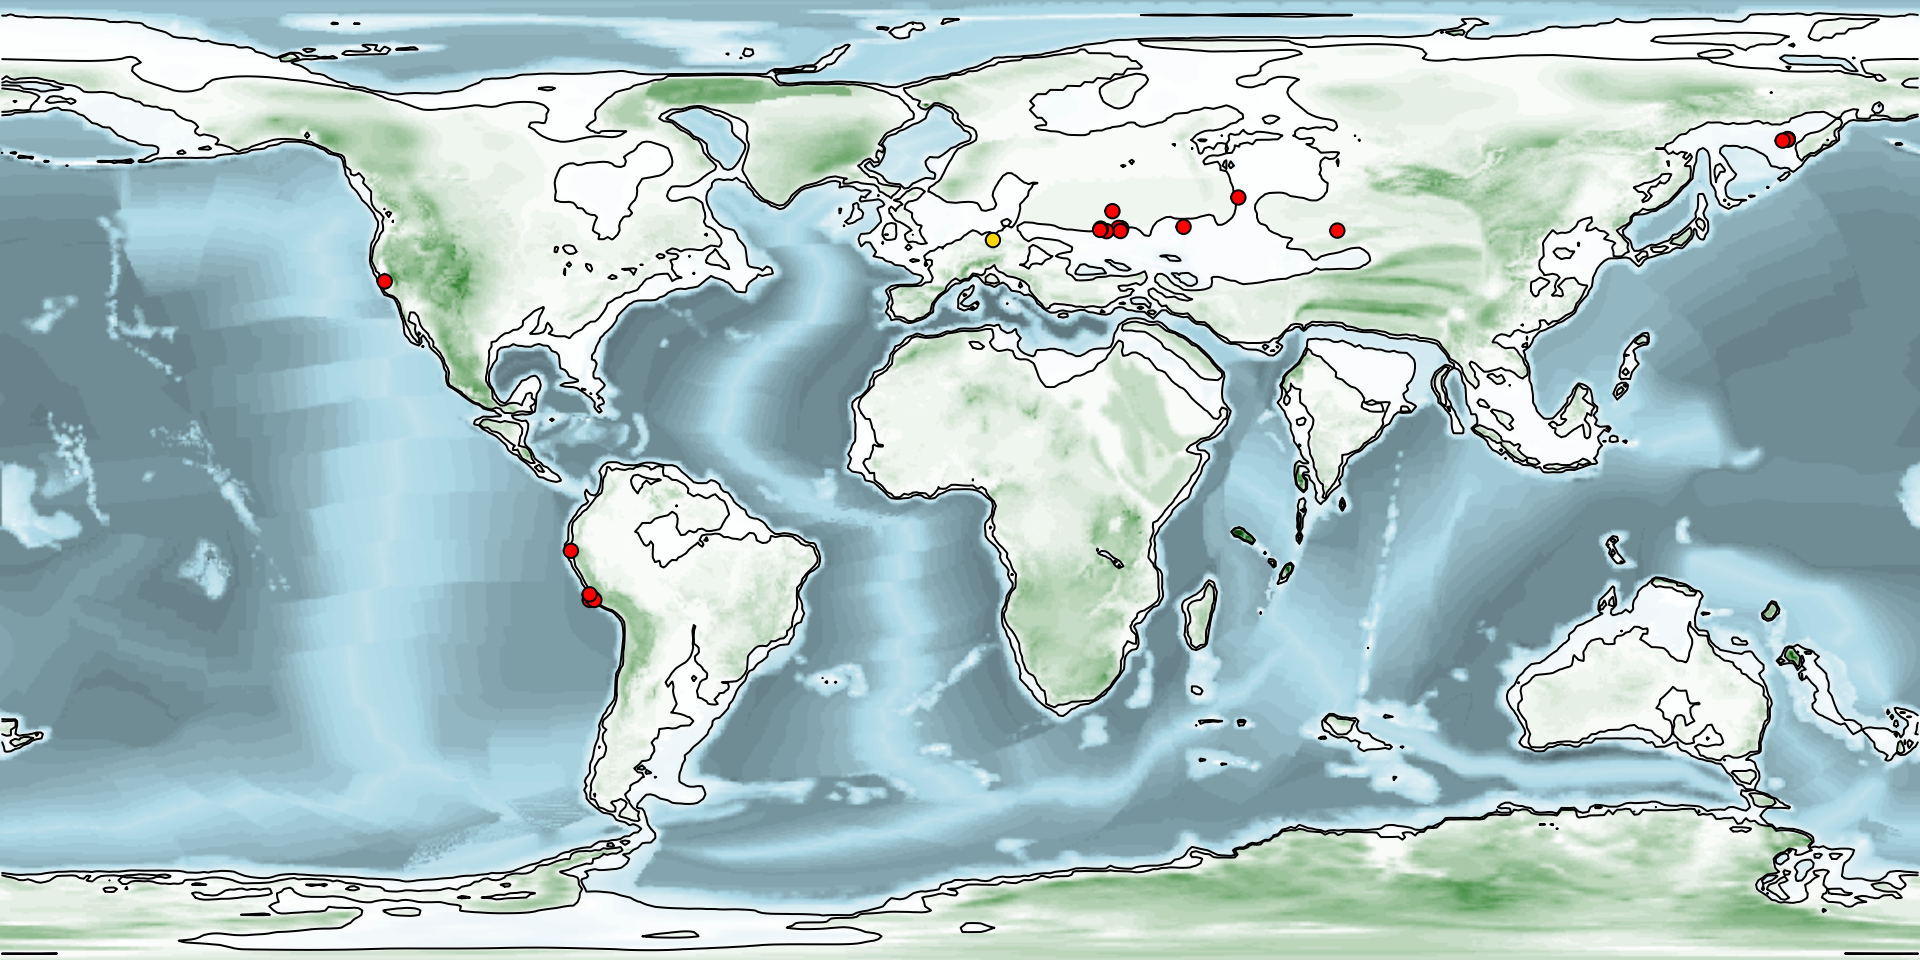

Supplement: Supplementary file 36 [file cp-20-2629-2024-supplement.zip]

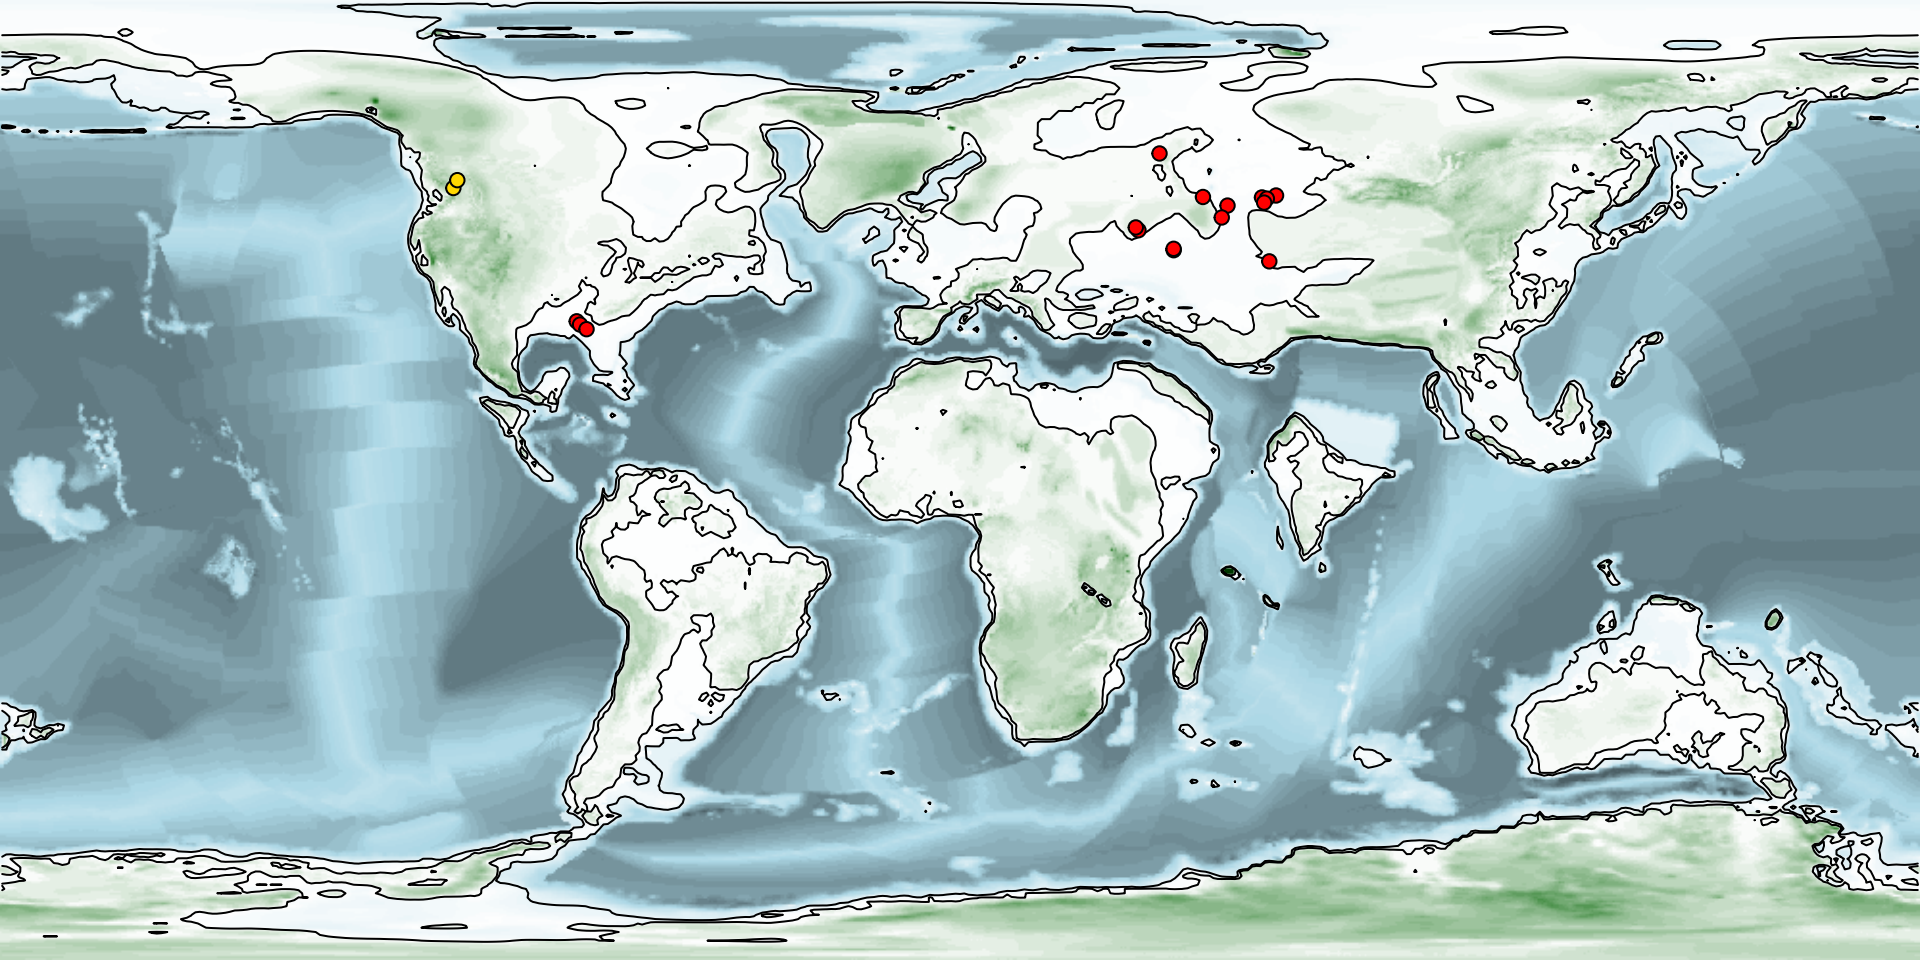

Supplement: Supplementary file 37 [file cp-20-2629-2024-supplement.zip]

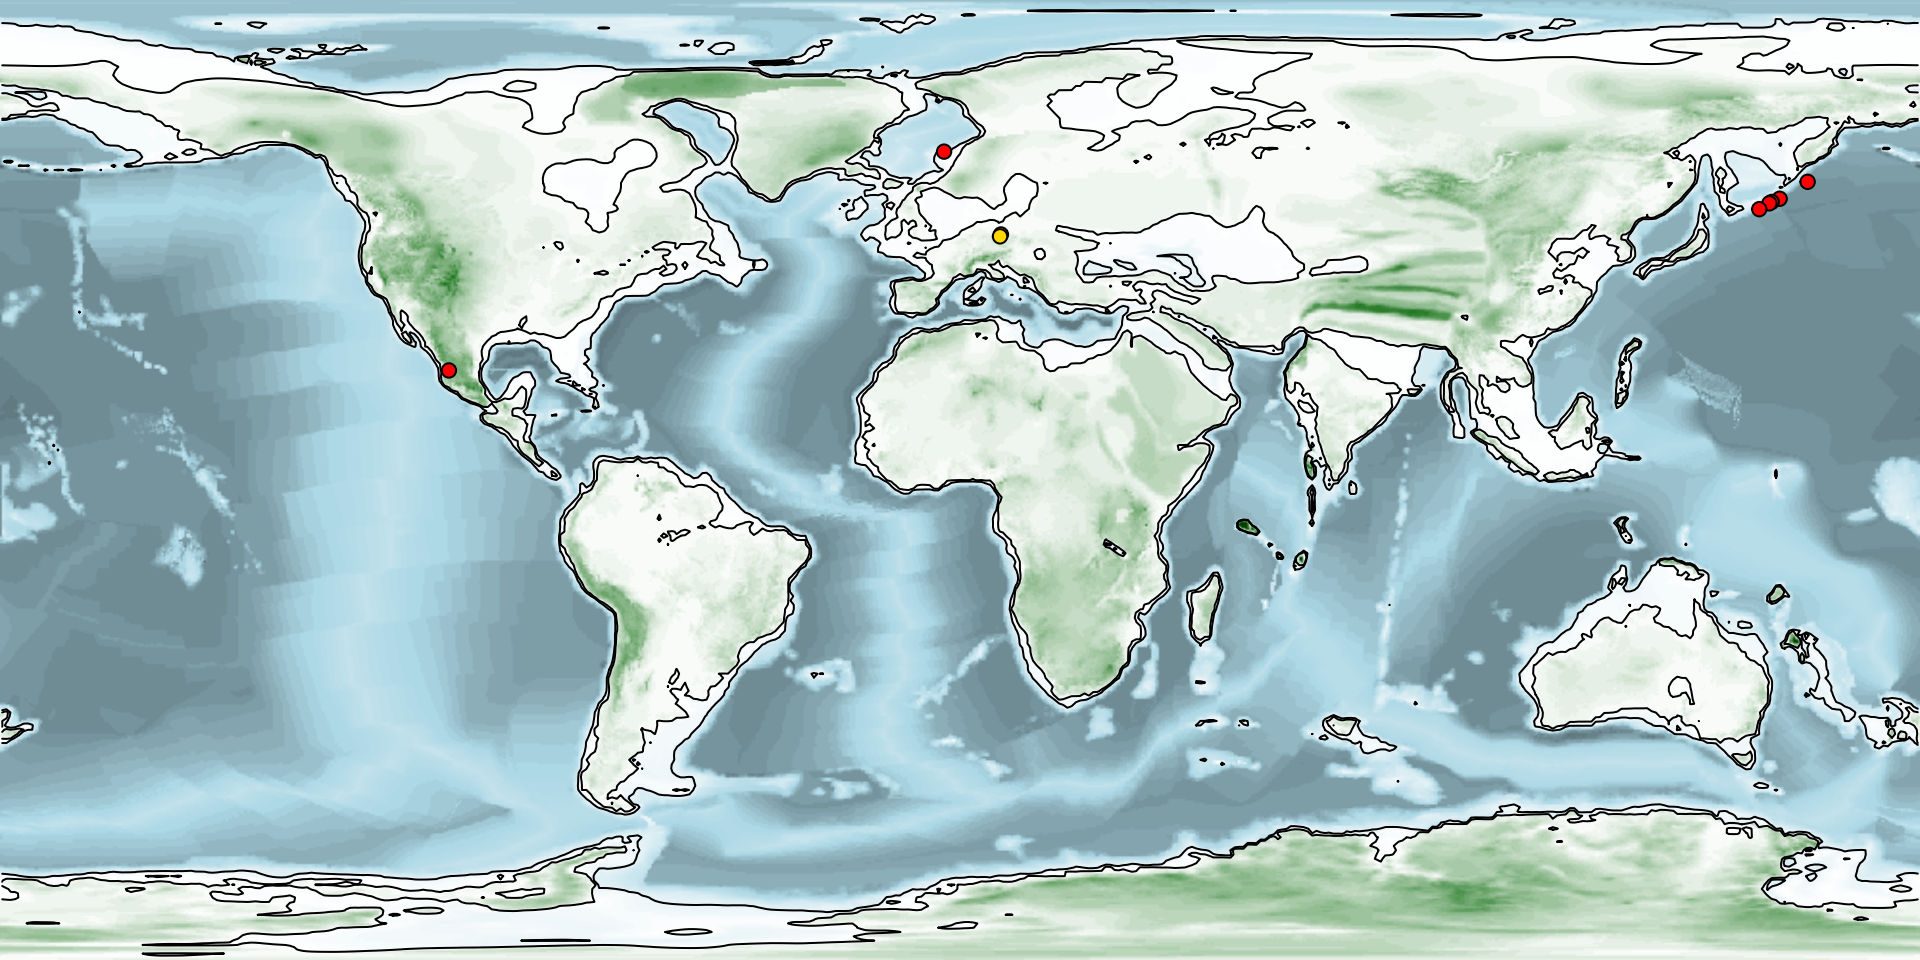

Supplement: Supplementary file 38 [file cp-20-2629-2024-supplement.zip]

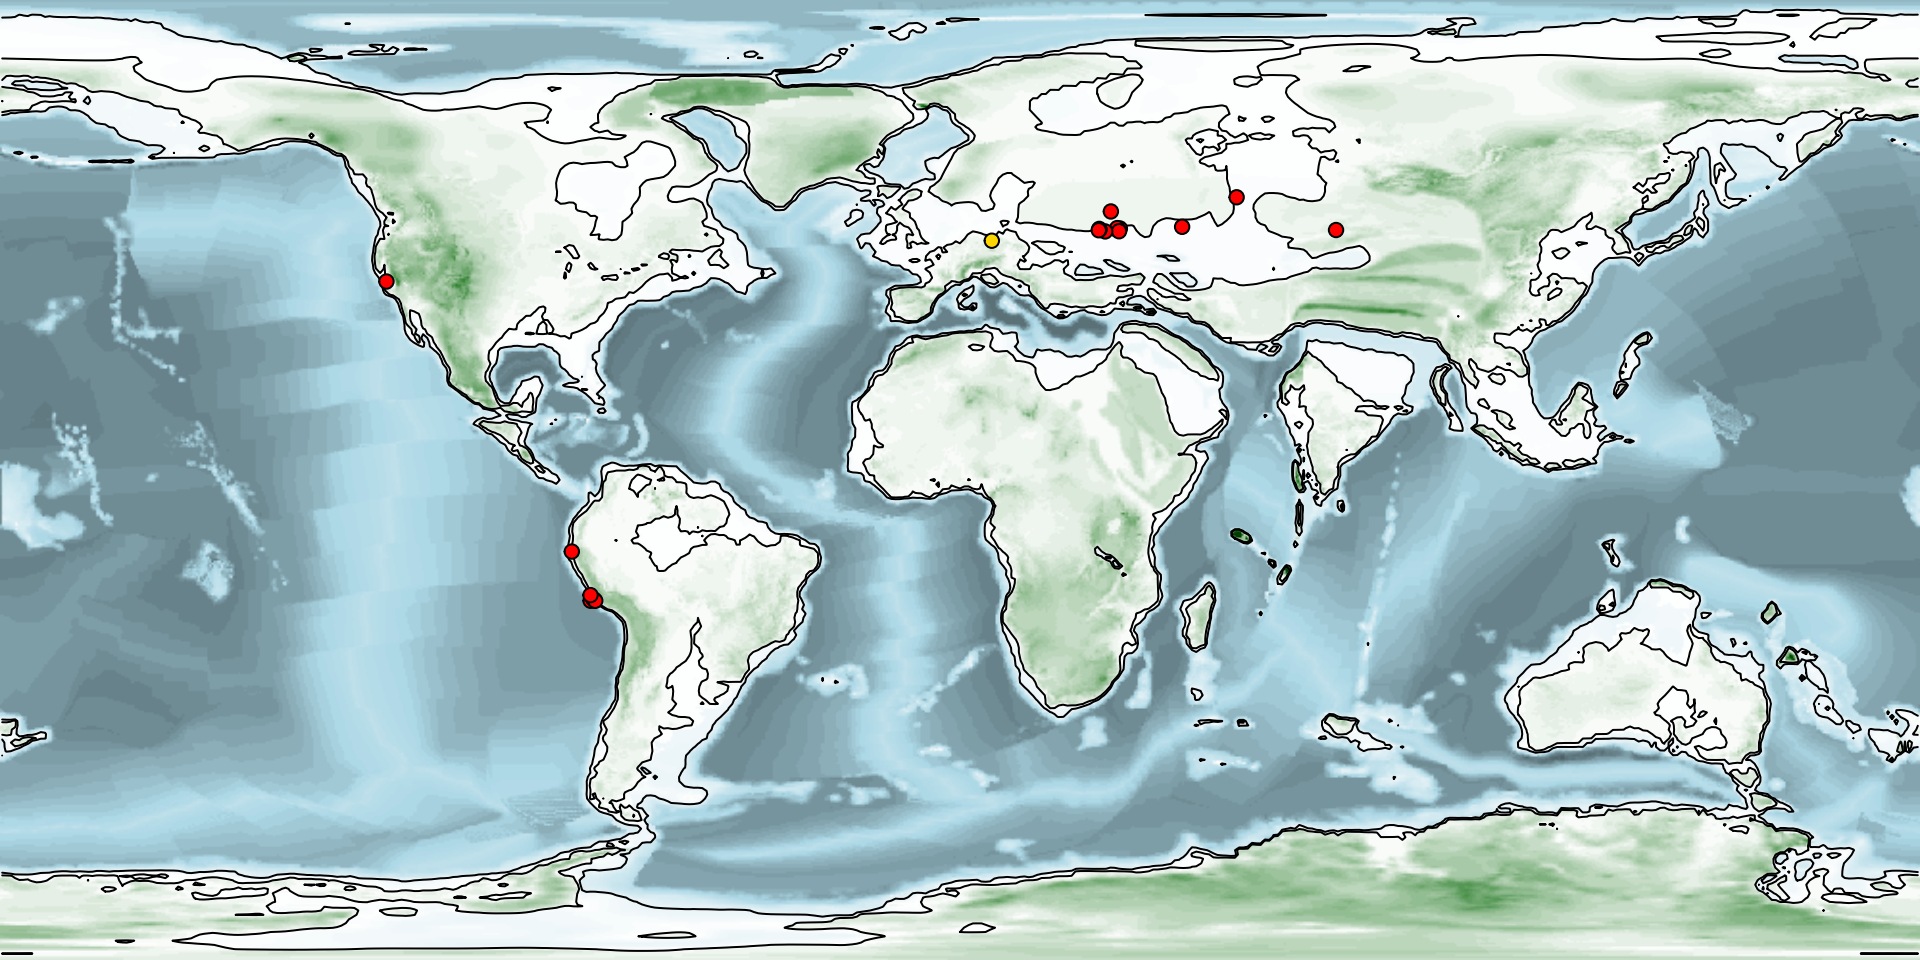

Supplement: Supplementary file 39 [file cp-20-2629-2024-supplement.zip]

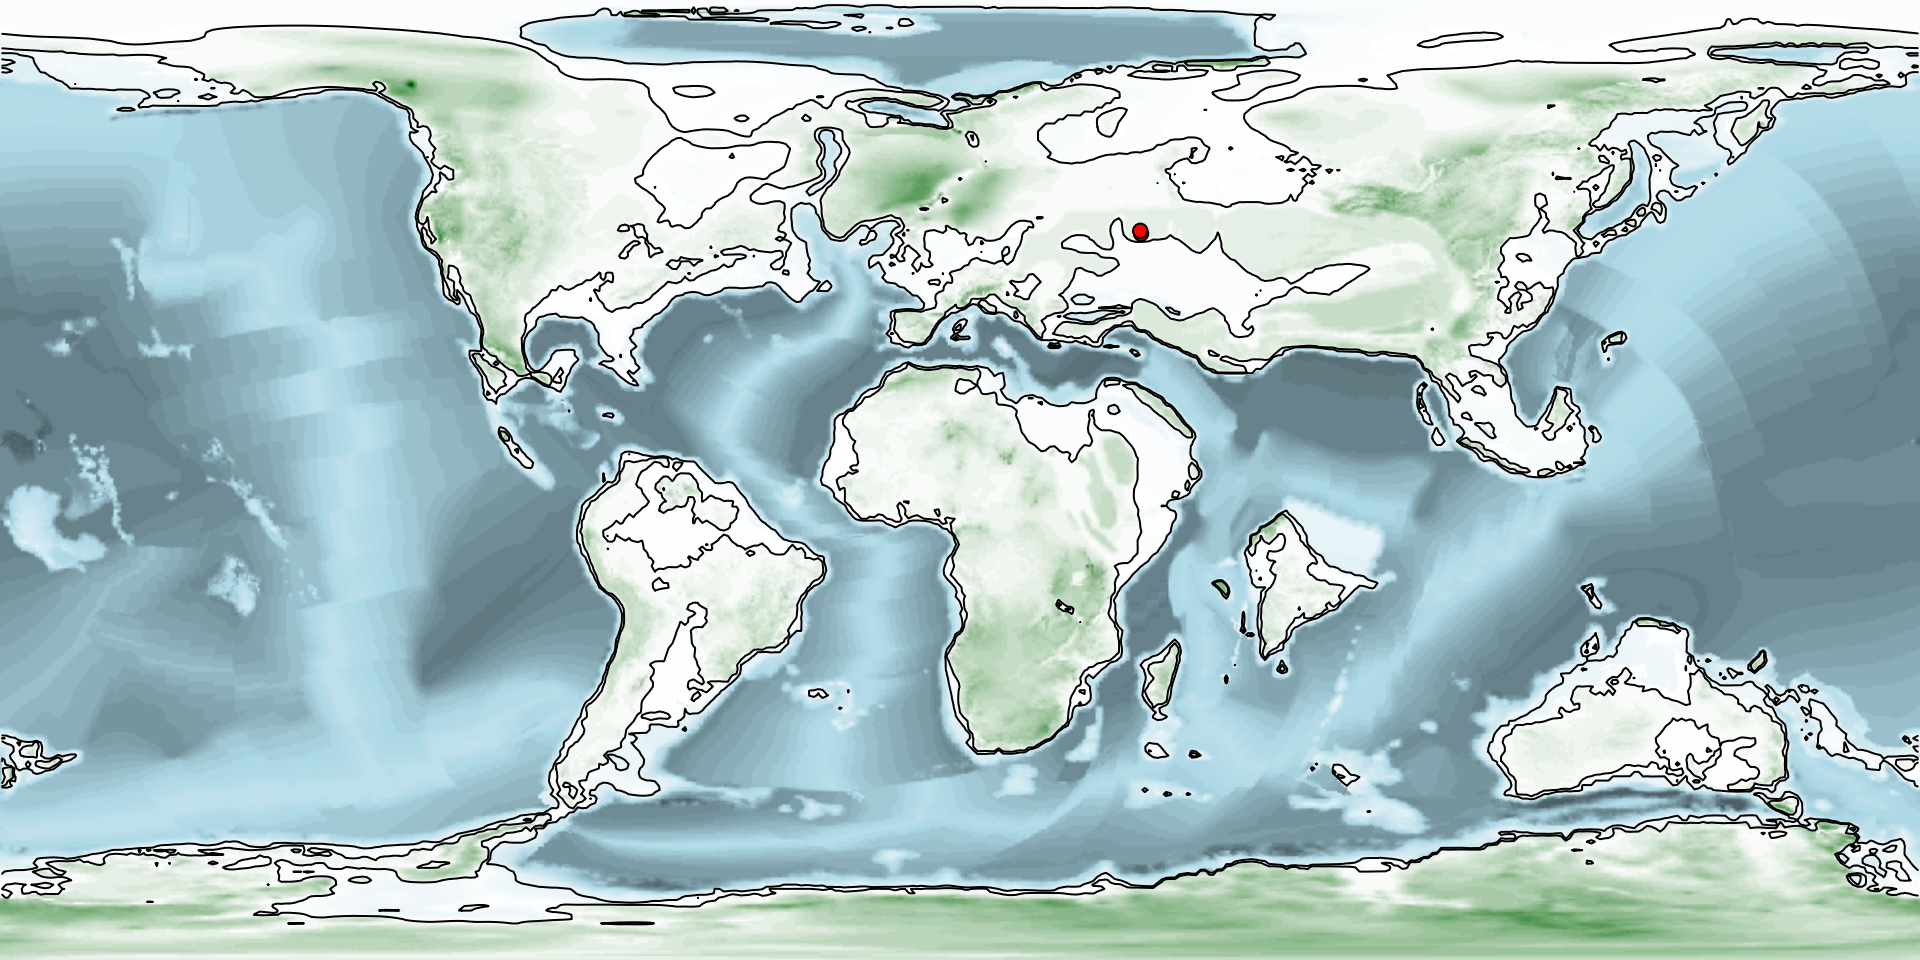

Supplement: Supplementary file 40 [file cp-20-2629-2024-supplement.zip]

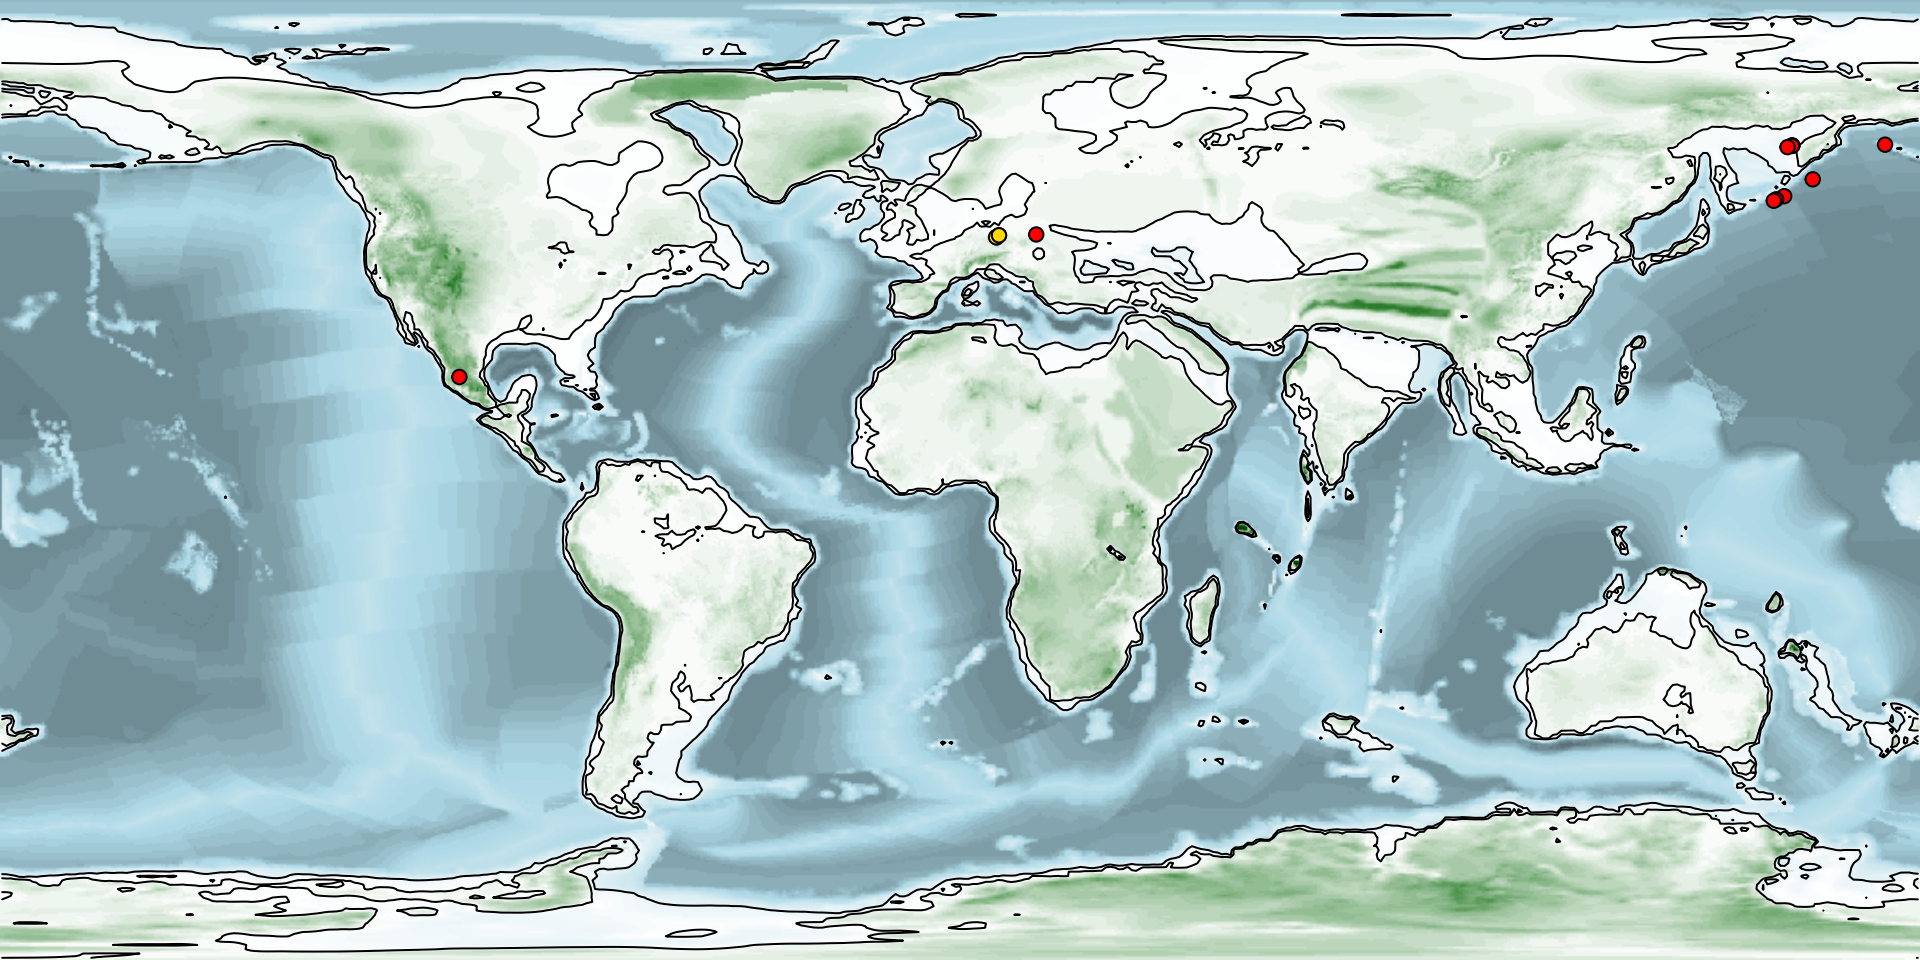

Supplement: Supplementary file 41 [file cp-20-2629-2024-supplement.zip]

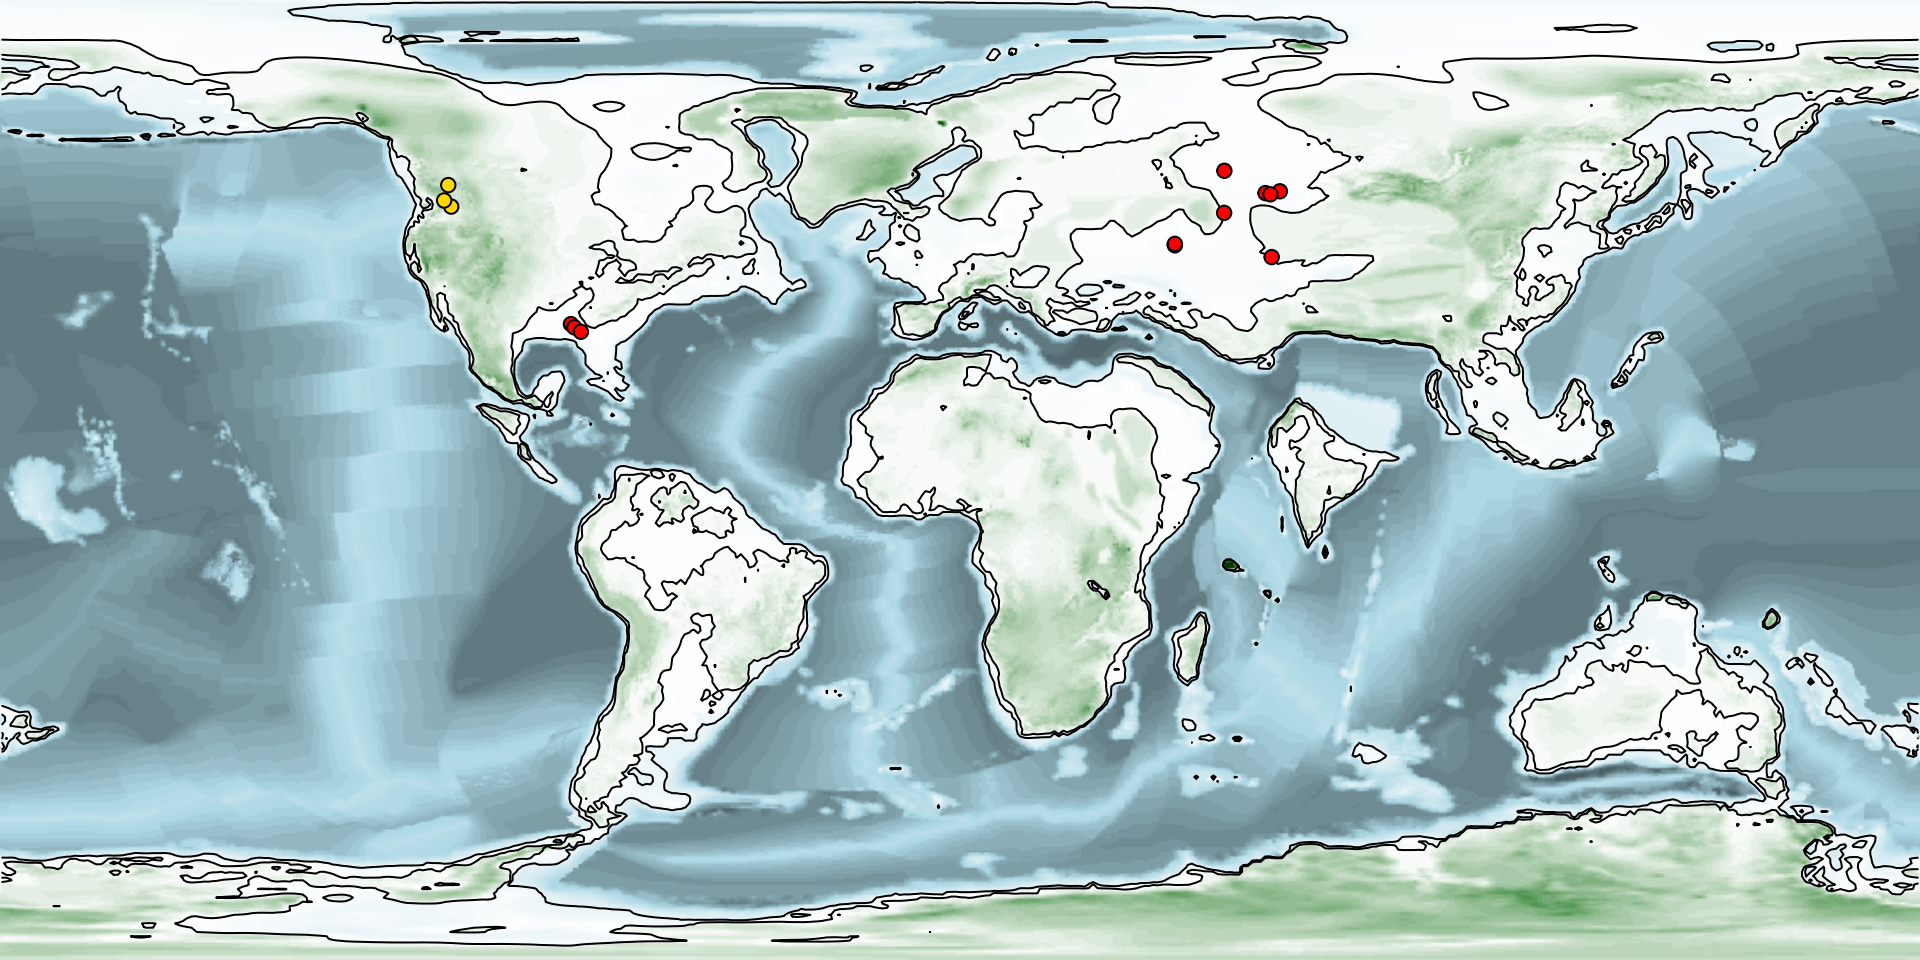

Supplement: Supplementary file 42 [file cp-20-2629-2024-supplement.zip]

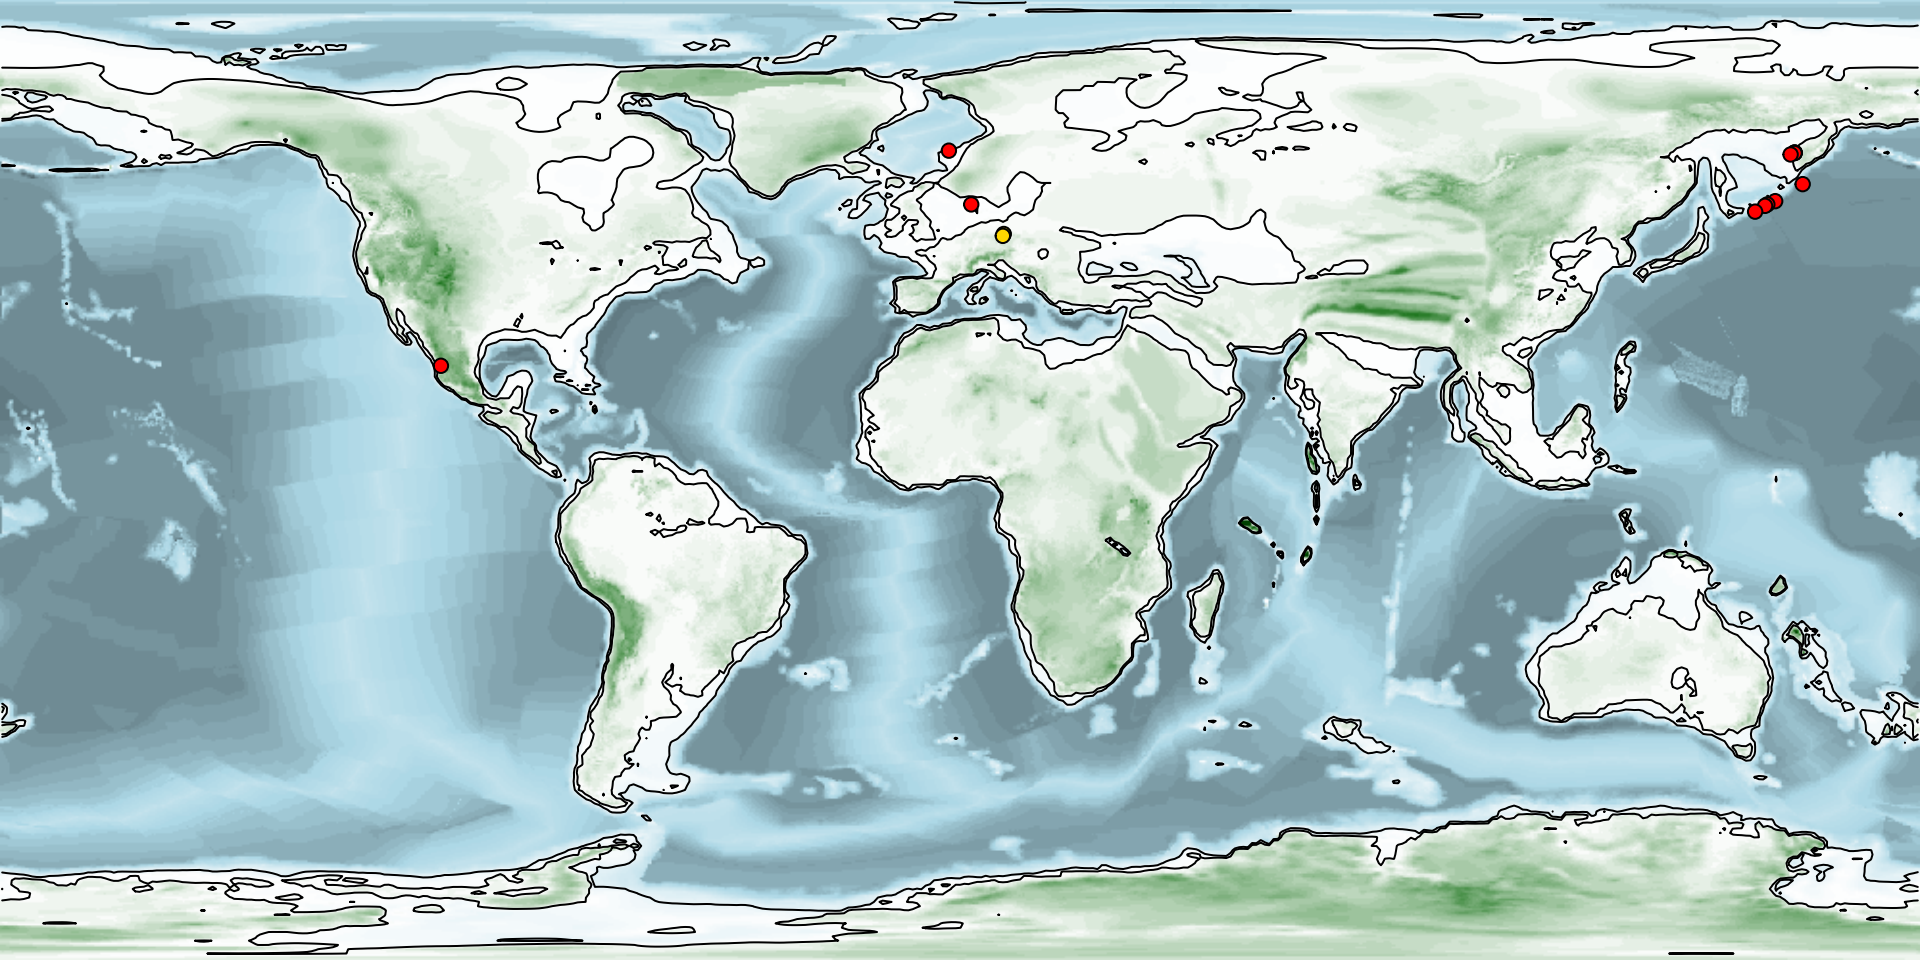

Supplement: Supplementary file 43 [file cp-20-2629-2024-supplement.zip]

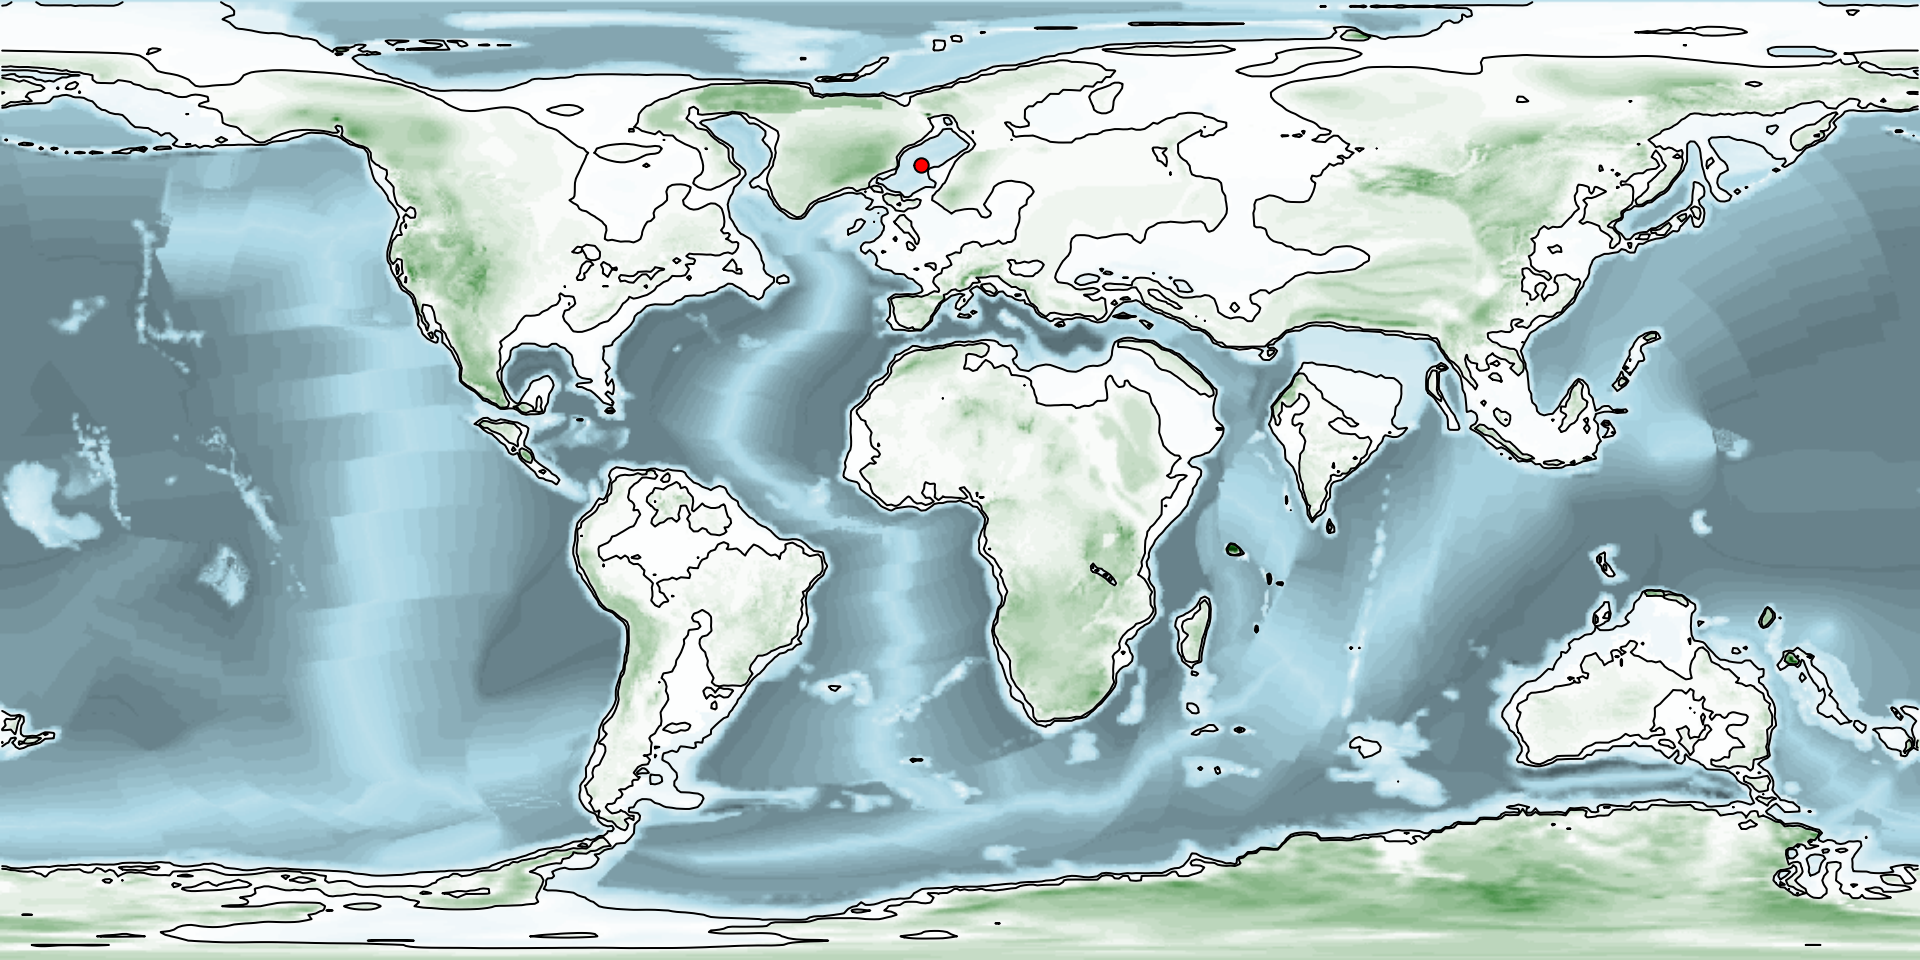

Supplement: Supplementary file 44 [file cp-20-2629-2024-supplement.zip]
